# Supplementary material for: Transcript Profile Analyses of Maize Silks Reveal Effective Activation of Genes Involved in Microtubule-Based Movement, Ubiquitin-Dependent Protein Degradation, and Transport in the Pollination Process
Source: PLoS One. 2013 Jan 3;8(1):e53545. doi: 10.1371/journal.pone.0053545 (PMC3536752; doi:10.1371/journal.pone.0053545)
Supplement: Table S2 — Genes expressed at four developmental stages of maize silk. (XLS) [file pone.0053545.s002.xls]

## Sheet: Table S2
					Genes expressed at four developmental stages of maize silk

## Sheet: 2A
	Genes expressed in IMS
Locus	Uniq_reads_num	Length	Coverage	RPKM
GRMZM2G016890	19963	2092	0.9383	1884.81
GRMZM2G340251	16205	2648	0.8769	1208.74
GRMZM2G153292	16048	1889	0.9455	1678
GRMZM2G056039	12610	2498	0.9203	997.071
GRMZM2G168651	11410	1607	0.8432	1402.4
GRMZM2G146308	9083	901	0.9512	1991.17
GRMZM2G112165	8245	2919	0.8153	557.905
GRMZM5G834758	7979	1571	0.9593	1003.17
GRMZM2G419891	7743	1976	0.9949	773.973
GRMZM2G364069	7603	2146	0.4725	699.775
GRMZM2G152466	7506	2297	0.7614	645.433
GRMZM2G330019	7379	2766	0.915	526.925
GRMZM2G409726	6377	2382	0.7716	528.784
GRMZM2G012631	6158	2668	0.9869	455.887
GRMZM2G154397	5873	2526	0.772	459.23
GRMZM2G031311	5807	2434	0.984	471.232
GRMZM2G026218	5666	4245	0.9802	263.634
GRMZM2G445602	5430	2435	0.9384	440.458
GRMZM2G004382	5364	2076	0.9147	510.346
GRMZM2G155532	5163	2767	0.9523	368.55
GRMZM5G815894	5162	1357	0.9167	751.349
GRMZM2G122479	5154	2473	0.9252	411.646
GRMZM2G153541	5127	1961	0.8251	516.403
GRMZM2G144387	4973	1127	0.9122	871.561
GRMZM2G067985	4962	2685	0.5356	365.019
GRMZM2G163081	4957	1513	0.8579	647.118
GRMZM2G020801	4913	3273	0.9517	296.486
GRMZM2G152908	4864	3149	0.9784	305.087
GRMZM2G086030	4857	5637	0.8886	170.186
GRMZM2G467799	4856	8676	0.9467	110.551
GRMZM2G080603	4832	1547	0.6031	616.936
GRMZM2G082855	4774	3756	0.9838	251.05
GRMZM2G026930	4736	1564	0.9763	598.106
GRMZM2G101875	4692	2330	0.9403	397.746
GRMZM2G166767	4623	3466	0.7926	263.45
GRMZM2G126397	4482	923	0.9523	959.121
GRMZM2G035405	4479	2932	0.9512	301.731
GRMZM2G134980	4437	1813	0.5863	483.387
AC195340.3	4409	3444	0.1832	252.86
GRMZM2G166944	4343	2114	0.789	405.778
GRMZM2G057646	4165	3127	0.9584	263.082
GRMZM2G102829	4124	2673	0.8743	304.735
GRMZM2G159032	4121	1410	0.9667	577.28
GRMZM2G122871	4092	1909	0.8612	423.383
GRMZM2G097059	4078	1186	0.8912	679.15
GRMZM2G011483	4072	3743	0.918	214.878
GRMZM2G377341	4055	7198	0.9555	111.271
GRMZM2G343543	3980	1886	0.9125	416.816
GRMZM5G851266	3975	2172	0.9986	361.477
GRMZM2G155111	3936	3487	0.9194	222.949
GRMZM2G041697	3880	5460	0.97	140.36
GRMZM2G071790	3771	1927	0.9196	386.525
GRMZM2G019266	3730	2363	0.9441	311.78
GRMZM2G057576	3708	5731	0.9131	127.795
GRMZM2G027995	3663	1916	0.9671	377.611
GRMZM2G102760	3655	3292	0.9368	219.296
GRMZM2G157727	3638	4059	0.9593	177.03
GRMZM2G048371	3528	1839	0.9271	378.922
GRMZM5G836222	3516	1247	0.9046	556.911
AC209208.3	3490	2967	0.8237	232.333
GRMZM2G472428	3463	6423	0.9925	106.492
GRMZM2G101711	3462	4566	0.9961	149.76
AC203173.3	3444	2532	0.9878	268.66
GRMZM5G858094	3434	7464	0.9778	90.8724
GRMZM2G163849	3422	7070	0.9248	95.6013
GRMZM2G165901	3381	1256	0.6433	531.69
GRMZM2G044306	3373	6143	0.9902	108.452
GRMZM2G020187	3357	2246	0.9608	295.219
GRMZM2G079348	3342	2788	0.5491	236.765
GRMZM2G150772	3339	5204	0.9892	126.731
GRMZM2G027955	3260	2538	0.881	253.705
GRMZM2G439201	3247	2117	0.41	302.946
GRMZM2G331368	3230	11519	0.9664	55.3849
GRMZM2G043489	3218	4104	0.8426	154.875
GRMZM2G553687	3218	5724	0.9741	111.043
GRMZM2G124317	3213	1218	0.7947	521.035
GRMZM2G078641	3204	3933	0.2471	160.906
GRMZM2G031545	3194	1283	0.7857	491.713
GRMZM2G358059	3157	1861	0.8608	335.067
GRMZM2G088309	3144	1228	0.9202	505.694
GRMZM2G069651	3131	2688	0.9327	230.068
GRMZM2G159397	3126	1730	0.9081	356.9
GRMZM2G076062	3119	2836	0.9552	217.226
GRMZM2G117707	3118	2779	0.6617	221.611
GRMZM2G033478	3109	6597	0.9955	93.0845
GRMZM2G026991	3080	6849	0.9853	88.8233
GRMZM2G092447	3076	3582	0.8448	169.615
GRMZM2G015875	3030	4034	0.9648	148.358
GRMZM2G123029	3029	2021	0.9416	296.03
GRMZM2G130230	2996	2115	0.8397	279.792
GRMZM2G111642	2985	4188	0.9176	140.78
GRMZM2G169270	2981	4826	0.8717	122.005
GRMZM2G093050	2950	3467	0.9475	168.063
GRMZM2G043822	2935	2103	0.9097	275.659
GRMZM2G099355	2924	7504	0.8782	76.964
GRMZM2G080530	2900	2562	0.9528	223.574
GRMZM2G105996	2877	1162	0.9251	489.032
GRMZM2G424181	2860	4857	0.9897	116.306
GRMZM2G155242	2859	2268	0.9652	248.986
GRMZM2G117198	2855	1633	0.94	345.321
GRMZM2G107101	2846	4571	0.9457	122.978
GRMZM2G115812	2822	7741	0.8657	72.0051
GRMZM2G016323	2815	3574	0.8903	155.57
GRMZM2G011742	2815	2643	0.9001	210.37
GRMZM2G126190	2808	1816	0.94	305.411
GRMZM2G042992	2808	4464	0.9491	124.244
GRMZM2G116034	2794	2541	0.7198	217.183
GRMZM2G075255	2791	2491	0.9237	221.304
GRMZM2G421857	2791	2598	0.7055	212.19
GRMZM2G411536	2778	11470	0.929	47.8379
GRMZM2G326643	2761	6328	0.969	86.1794
GRMZM2G015295	2749	2241	0.8246	242.29
GRMZM2G024668	2745	2550	0.9737	212.621
GRMZM2G094497	2745	2063	0.9598	262.813
GRMZM2G023418	2726	4506	0.9789	119.492
GRMZM2G017187	2704	2579	0.981	207.09
GRMZM2G386643	2693	3540	0.9811	150.258
GRMZM2G014805	2661	4173	0.9724	125.95
GRMZM2G434173	2658	2497	0.7689	210.252
GRMZM2G146819	2653	4332	0.9868	120.963
GRMZM2G133802	2652	1821	0.8891	287.652
GRMZM2G149751	2630	3753	0.445	138.414
GRMZM2G123896	2589	1622	0.7176	315.271
GRMZM2G023232	2578	3133	0.9508	162.527
GRMZM2G108474	2568	1471	0.8083	344.815
GRMZM2G129034	2568	1616	0.7494	313.875
GRMZM2G083725	2566	1424	0.8034	355.918
GRMZM2G159744	2553	4590	0.959	109.86
GRMZM2G028980	2541	3863	0.9943	129.922
GRMZM2G096585	2530	2301	0.8805	217.174
GRMZM2G010637	2524	6355	0.9164	78.4471
GRMZM2G113696	2491	1520	0.5651	323.693
GRMZM2G701689	2491	3066	0.9925	160.474
GRMZM2G047310	2485	3851	0.8595	127.455
GRMZM2G347056	2475	2375	0.9491	205.833
GRMZM2G140051	2443	1713	0.8838	281.689
GRMZM2G085078	2440	7057	0.9011	68.2925
GRMZM2G406674	2392	3182	0.7011	148.479
GRMZM2G456570	2387	4635	0.8164	101.72
GRMZM2G113592	2383	3578	0.96	131.549
GRMZM2G030422	2377	4236	0.907	110.835
GRMZM2G096806	2370	3432	0.8741	136.397
GRMZM2G032003	2363	2560	0.8043	182.317
GRMZM2G064868	2358	3925	0.9654	118.661
GRMZM2G401308	2356	1580	0.5	294.525
AC207722.2	2347	1166	0.8756	397.574
GRMZM2G069687	2347	4931	0.9353	94.0116
GRMZM5G806358	2343	5464	0.6903	84.6964
GRMZM2G130095	2337	1985	0.9753	232.542
GRMZM2G089713	2327	3223	0.8306	142.607
GRMZM2G097812	2321	3029	0.996	151.349
GRMZM2G088212	2321	2178	0.9775	210.485
GRMZM2G335287	2316	5545	0.941	82.4974
GRMZM2G180625	2316	2060	0.5932	222.062
GRMZM2G326111	2293	1210	0.8198	374.302
GRMZM5G848945	2293	2811	0.9545	161.119
GRMZM2G102471	2279	1291	0.7328	348.675
GRMZM2G162755	2264	1880	0.9739	237.86
GRMZM2G463904	2261	3588	0.8891	124.466
GRMZM2G039455	2256	3704	0.902	120.302
GRMZM2G422464	2247	6222	0.9793	71.3307
GRMZM2G009479	2246	3118	0.9477	142.278
GRMZM2G021299	2229	11999	0.959	36.6917
GRMZM2G046804	2228	1963	0.7351	224.181
GRMZM2G328500	2218	2543	0.8002	172.274
GRMZM2G365160	2210	2100	0.9319	207.863
GRMZM2G141931	2210	2842	0.8881	153.593
GRMZM2G075320	2196	4953	0.9459	87.5724
GRMZM2G043338	2191	1123	0.8958	385.359
GRMZM5G837108	2167	1556	0.9499	275.076
GRMZM2G061135	2161	1715	0.8659	248.882
GRMZM2G087326	2153	1493	0.9652	284.831
GRMZM2G130987	2150	1797	0.9827	236.316
GRMZM2G108655	2148	4285	0.895	99.0118
GRMZM5G873455	2142	761	0.9488	555.953
GRMZM2G473788	2137	2751	0.8768	153.432
GRMZM2G111846	2131	7881	0.9377	53.4079
GRMZM2G375984	2120	2538	0.9271	164.986
GRMZM2G034985	2119	3349	0.9128	124.974
GRMZM2G053299	2114	2009	0.897	207.84
GRMZM2G116557	2114	3212	0.9384	129.997
GRMZM2G004528	2112	2306	0.6826	180.9
GRMZM2G348909	2111	2962	0.9899	140.769
GRMZM2G465169	2091	3455	0.5986	119.539
GRMZM2G064302	2082	2022	0.8947	203.377
GRMZM2G178398	2080	3613	0.9801	113.71
GRMZM2G433801	2075	7364	0.9489	55.6554
GRMZM2G051879	2070	1155	0.7117	353.991
GRMZM2G058910	2066	3761	0.7955	108.5
GRMZM2G441347	2066	2519	0.975	161.996
GRMZM2G135186	2065	1865	0.9099	218.698
GRMZM2G057000	2047	3182	0.8815	127.064
GRMZM2G082271	2043	4012	0.8258	100.58
GRMZM2G305046	2042	997	0.8937	404.542
GRMZM2G132060	2031	2327	0.8891	172.392
GRMZM2G065494	2018	3407	0.6918	116.991
GRMZM2G056252	2013	1961	0.823	202.754
GRMZM2G416388	2005	1788	0.9038	221.488
GRMZM2G352129	2005	2698	0.9229	146.783
GRMZM2G450920	2001	6755	0.9446	58.5093
GRMZM2G416069	2000	2003	0.9256	197.221
GRMZM2G144868	1995	2354	0.8539	167.394
GRMZM2G128877	1993	2325	0.9789	169.312
GRMZM5G829894	1986	1562	0.9027	251.132
GRMZM2G015989	1985	2635	0.8543	148.793
GRMZM2G375116	1985	3535	0.931	110.911
GRMZM2G091155	1979	1520	0.7974	257.161
GRMZM2G013318	1975	2511	0.9331	155.354
GRMZM2G074604	1971	2783	0.8132	139.887
GRMZM2G073725	1969	1781	0.8652	218.366
GRMZM2G030463	1968	2858	0.9465	136.009
GRMZM2G153162	1967	6145	0.9601	63.2246
GRMZM2G121210	1960	3061	0.9487	126.472
GRMZM2G020920	1946	4287	0.9874	89.6587
GRMZM2G115750	1941	1642	0.9245	233.483
GRMZM2G389233	1939	3609	0.9163	106.119
GRMZM2G113137	1937	4126	0.9564	92.7265
GRMZM2G430680	1936	6429	0.9575	59.4792
GRMZM2G174757	1929	2533	0.9684	150.418
GRMZM2G351018	1924	4688	0.9213	81.0626
GRMZM2G123558	1923	1275	0.9161	297.901
GRMZM2G157317	1923	1977	0.9676	192.121
GRMZM2G181151	1921	2279	0.8732	166.489
GRMZM2G126338	1914	3056	0.4846	123.706
AC207890.3	1914	2961	0.9872	127.675
GRMZM5G870752	1903	1178	0.9058	319.078
GRMZM2G064136	1902	680	0.6059	552.465
GRMZM2G104199	1902	2331	0.9807	161.165
GRMZM2G438895	1898	4792	0.943	78.2317
GRMZM2G055970	1898	1766	0.8952	212.28
GRMZM5G887054	1898	1182	0.8012	317.163
AC203535.4	1890	2778	0.9964	134.379
GRMZM2G083526	1887	2569	0.9323	145.081
GRMZM2G439950	1884	3536	0.9505	105.238
GRMZM2G129354	1883	2163	0.9565	171.948
GRMZM2G100146	1876	1366	0.8777	271.26
GRMZM2G540538	1873	1532	0.9615	241.481
GRMZM2G382914	1871	1985	0.7899	186.173
GRMZM2G378580	1865	3569	0.863	103.213
GRMZM2G334457	1864	3958	0.948	93.0194
GRMZM2G027723	1856	3924	0.9529	93.4227
GRMZM2G080270	1854	2494	0.9779	146.831
GRMZM2G131943	1851	2532	0.9009	144.393
GRMZM2G131443	1850	3988	0.9351	91.6262
GRMZM5G877316	1847	1762	0.9574	207.045
GRMZM2G033526	1841	2643	0.7764	137.581
GRMZM2G090274	1837	2020	0.9752	179.623
GRMZM2G058870	1831	5732	0.9754	63.0936
GRMZM2G123922	1815	3408	0.9566	105.191
GRMZM2G164020	1811	1622	0.783	220.532
GRMZM2G105631	1809	2399	0.8299	148.94
GRMZM2G027875	1804	2942	0.9109	121.115
GRMZM2G099860	1803	4077	0.9333	87.3491
GRMZM2G333980	1801	1449	0.9165	245.498
GRMZM2G141818	1801	4052	0.6594	87.7905
GRMZM2G360517	1797	5913	0.9439	60.0266
GRMZM5G844173	1796	3982	0.95	89.0858
GRMZM2G084540	1789	3601	0.8417	98.1275
GRMZM2G017525	1788	1795	0.907	196.746
GRMZM2G074906	1784	5484	0.7163	64.2541
GRMZM2G088088	1783	2476	0.956	142.234
GRMZM2G153977	1782	1232	0.7825	285.693
GRMZM2G324973	1775	3300	0.7624	106.24
GRMZM2G055331	1770	3938	0.9312	88.7771
GRMZM2G156673	1762	1736	0.6043	200.475
GRMZM2G012391	1760	2284	0.8796	152.202
GRMZM2G175818	1759	1364	0.9355	254.715
GRMZM2G133173	1759	2715	0.9389	127.967
GRMZM2G092451	1756	2603	0.9101	133.246
AC234203.1	1754	4491	0.9568	77.1418
GRMZM2G049269	1754	3238	0.8965	106.993
GRMZM2G124441	1743	2710	0.6952	127.037
GRMZM2G354604	1743	1322	0.8835	260.417
GRMZM2G047055	1742	2227	0.8181	154.501
GRMZM2G062076	1741	1304	0.7546	263.709
GRMZM2G057642	1738	1393	0.9024	246.435
GRMZM2G029219	1736	2179	0.9339	157.361
GRMZM2G464782	1734	1828	0.9502	187.36
GRMZM5G809695	1732	3508	0.8997	97.5195
GRMZM2G002559	1731	2638	0.848	129.606
GRMZM2G171518	1729	2086	0.8442	163.713
GRMZM2G134668	1727	2362	0.8878	144.416
GRMZM2G320013	1727	3442	0.9718	99.1025
GRMZM2G122810	1725	1711	0.9532	199.133
GRMZM2G394827	1724	1270	0.7969	268.125
GRMZM2G146472	1724	1522	0.8771	223.731
GRMZM2G059015	1722	3300	0.9539	103.068
GRMZM2G392975	1721	1674	0.7927	203.062
AC235535.1	1713	3342	0.939	101.24
GRMZM2G110153	1699	1210	0.9694	277.339
GRMZM2G125271	1697	1178	0.8497	284.538
GRMZM2G127729	1694	2848	0.9817	117.483
GRMZM2G025598	1694	2882	0.8661	116.097
GRMZM2G032252	1691	2592	0.9306	128.858
GRMZM2G165917	1691	2604	0.7945	128.264
GRMZM2G127609	1690	1809	0.6495	184.523
GRMZM2G130425	1683	2467	0.8918	134.747
GRMZM2G311165	1680	5205	0.6584	63.7517
GRMZM2G144030	1678	1617	0.4651	204.968
GRMZM2G330024	1678	5156	0.9527	64.281
GRMZM2G033208	1675	3653	0.6753	90.5667
GRMZM2G027451	1674	2035	0.63	162.478
GRMZM2G035985	1674	4170	0.8173	79.2908
GRMZM2G399320	1671	4309	0.91	76.5955
GRMZM2G341271	1669	3160	0.8972	104.321
GRMZM2G480002	1665	5453	0.9818	60.309
GRMZM2G326472	1660	4202	0.8962	78.0289
GRMZM2G105770	1659	3708	0.9399	88.371
GRMZM2G093096	1657	2158	0.9773	151.661
GRMZM5G851698	1655	1304	0.8773	250.682
GRMZM2G434277	1652	2736	0.9408	119.261
GRMZM2G314546	1651	5264	0.9233	61.949
AC155434.2	1648	5208	0.9649	62.5014
GRMZM2G134806	1647	1359	0.9029	239.374
GRMZM2G038964	1645	1591	0.8492	204.22
GRMZM2G019919	1643	2910	0.9907	111.519
GRMZM2G113408	1634	2677	0.7912	120.561
GRMZM2G447745	1633	5941	0.9204	54.2913
GRMZM2G338259	1631	3192	0.8102	100.924
GRMZM2G140328	1626	3559	0.9612	90.2393
GRMZM2G446050	1625	5975	0.7828	53.7179
GRMZM2G035017	1622	1469	0.5936	218.088
GRMZM2G010085	1621	3322	0.9127	96.3799
GRMZM2G314769	1620	1145	0.8288	279.456
GRMZM2G031846	1620	2665	0.9614	120.066
GRMZM2G047093	1617	3465	0.981	92.1744
GRMZM2G171068	1611	6075	0.9002	52.3784
GRMZM5G835323	1611	1250	0.7272	254.559
GRMZM2G114162	1608	6466	0.9139	49.1195
GRMZM2G147716	1601	1522	0.8515	207.769
GRMZM2G006107	1600	2983	0.9621	105.942
AC233866.1	1599	1344	0.9792	234.992
GRMZM2G142088	1595	3013	0.921	104.56
GRMZM2G375222	1588	4849	0.9788	64.6847
GRMZM2G145088	1583	4169	0.983	74.9985
GRMZM2G467169	1582	3479	0.9554	89.8163
GRMZM2G110735	1578	2808	0.8216	110.998
GRMZM2G160316	1577	2395	0.9081	130.056
GRMZM2G080466	1575	1557	0.6063	199.8
GRMZM2G016655	1573	2767	0.9736	112.285
GRMZM5G826714	1571	2080	0.9567	149.182
GRMZM2G138268	1571	1812	0.8725	171.246
GRMZM2G409865	1570	2098	0.9909	147.808
GRMZM2G132759	1570	1284	0.7625	241.512
GRMZM2G025592	1567	3809	0.8532	81.2571
AC197672.3	1567	6978	0.9719	44.3549
GRMZM2G153924	1567	1736	0.8099	178.288
GRMZM2G582965	1566	2037	0.9553	151.846
GRMZM2G384327	1566	2122	0.9237	145.764
GRMZM2G035520	1565	3499	0.9666	88.3433
GRMZM2G114570	1563	2689	0.8278	114.808
GRMZM2G181551	1562	1534	0.8631	201.122
GRMZM2G116273	1561	1337	0.6986	230.608
GRMZM2G126453	1558	3171	0.9814	97.0453
GRMZM2G061969	1557	3144	0.9415	97.8159
GRMZM2G022180	1557	2427	0.6902	126.713
GRMZM2G083253	1556	1868	0.5605	164.527
GRMZM2G451716	1556	3960	0.9851	77.61
GRMZM2G080274	1555	1108	0.7843	277.2
GRMZM2G168629	1554	4460	0.8823	68.8208
AC218972.3	1551	2598	0.9315	117.917
GRMZM2G059212	1549	2438	0.9729	125.493
GRMZM2G068755	1549	6523	0.9347	46.9037
GRMZM2G099657	1546	1683	0.7986	181.438
GRMZM2G162992	1539	2577	0.9371	117.958
GRMZM2G094123	1538	1984	0.9723	153.115
GRMZM2G038284	1537	2042	0.7468	148.669
GRMZM2G093119	1533	4243	0.946	71.3629
GRMZM2G316191	1532	7924	0.8747	38.1872
GRMZM2G108285	1532	1005	0.9343	301.09
GRMZM2G091119	1528	2331	0.9477	129.475
GRMZM2G079089	1528	1409	0.6537	214.198
GRMZM2G105571	1527	1735	0.936	173.837
GRMZM2G106424	1525	1539	0.8655	195.72
GRMZM2G039263	1521	2051	0.9449	146.476
GRMZM2G149153	1521	7521	0.977	39.9445
GRMZM2G165944	1520	4079	0.9488	73.6026
GRMZM2G108348	1518	1542	0.6265	194.442
GRMZM2G125044	1513	3315	0.8525	90.1485
GRMZM2G078826	1513	2914	0.9719	102.554
GRMZM2G038281	1512	3426	0.8584	87.1701
GRMZM2G164352	1509	2271	0.9621	131.243
GRMZM2G134256	1509	1922	0.8481	155.074
GRMZM2G054136	1508	1362	0.7841	218.689
GRMZM2G155384	1504	3343	0.936	88.8617
GRMZM2G418604	1504	3641	0.9874	81.5888
GRMZM2G174896	1501	1957	0.9714	151.493
GRMZM2G070487	1501	2931	0.7946	101.151
GRMZM2G115975	1497	3229	0.8959	91.5708
GRMZM2G370715	1497	4703	0.9532	62.871
GRMZM2G109039	1496	2062	0.8647	143.3
GRMZM5G805387	1494	1976	0.5815	149.337
GRMZM2G130586	1493	3155	0.948	93.4682
GRMZM2G084465	1492	1714	0.7433	171.934
GRMZM2G095124	1491	3204	0.9657	91.9154
GRMZM2G180988	1491	3654	0.9048	80.5958
GRMZM2G172932	1489	1876	0.7708	156.771
GRMZM2G164956	1485	3725	0.6872	78.7415
GRMZM2G414915	1484	2665	0.9629	109.987
GRMZM2G414002	1484	5869	0.9138	49.9428
GRMZM2G179523	1483	2591	0.9672	113.052
GRMZM2G154218	1483	1782	0.647	164.375
GRMZM2G004703	1478	1069	0.8756	273.086
GRMZM2G052078	1478	4930	0.9519	59.2149
GRMZM2G166694	1470	3274	0.858	88.6833
GRMZM2G370081	1469	3498	0.8582	82.9479
GRMZM2G072205	1466	2375	0.9229	121.92
GRMZM2G100242	1465	5158	0.986	56.0996
GRMZM2G063806	1464	3409	0.9683	84.8237
GRMZM2G102161	1462	1215	0.8938	237.67
GRMZM2G152963	1461	4346	0.8797	66.3993
GRMZM2G105019	1458	1745	0.8241	165.031
GRMZM2G131334	1454	2848	0.935	100.839
GRMZM2G118243	1454	4785	0.8894	60.0186
GRMZM2G095593	1450	1348	0.8865	212.462
GRMZM2G086887	1447	2688	0.8586	106.327
GRMZM2G166524	1445	2361	0.9784	120.886
GRMZM2G116126	1444	4609	0.9809	61.8819
GRMZM2G018508	1443	3684	0.9601	77.366
GRMZM2G017835	1442	2651	0.9811	107.438
GRMZM2G066024	1441	1877	0.8023	151.636
GRMZM2G306806	1439	3854	0.9185	73.7484
GRMZM2G095727	1439	3454	0.9687	82.289
GRMZM2G408096	1438	2934	0.968	96.806
GRMZM2G410393	1435	6466	0.7246	43.8348
GRMZM2G153815	1434	2716	0.8859	104.285
GRMZM2G385287	1433	1387	0.5811	204.067
GRMZM2G589579	1432	3118	0.9503	90.7131
GRMZM2G046841	1429	1354	0.5835	208.457
GRMZM2G024151	1426	1906	0.7524	147.775
GRMZM2G082874	1418	1894	0.9456	147.877
GRMZM2G378906	1416	3430	0.8889	81.5403
GRMZM2G084819	1416	14668	0.9129	19.0676
GRMZM2G027851	1416	2654	0.9359	105.382
GRMZM2G097802	1415	2168	0.9636	128.914
GRMZM2G094712	1415	2163	0.8225	129.212
GRMZM2G089836	1414	2608	0.9693	107.089
GRMZM2G141587	1413	3353	0.9433	83.2361
GRMZM5G813627	1413	2417	0.9379	115.47
GRMZM2G139894	1412	3445	0.9791	80.956
GRMZM2G100229	1411	2430	0.9218	114.69
GRMZM2G125635	1410	2100	0.9595	132.618
GRMZM2G006042	1410	3202	0.9666	86.9763
GRMZM2G376074	1406	4124	0.9484	67.3395
GRMZM2G144995	1405	2067	0.8737	134.258
GRMZM2G109009	1405	3222	0.9721	86.1299
GRMZM2G125294	1404	6126	0.9576	45.2682
GRMZM2G124335	1404	2470	0.8538	112.273
GRMZM2G085568	1403	2415	0.6969	114.748
GRMZM2G175562	1403	1568	0.7761	176.732
EF517601.1	1403	2364	0.6409	117.223
GRMZM2G004959	1398	1225	0.8269	225.411
GRMZM2G174807	1396	1388	0.9878	198.655
GRMZM2G157019	1395	1319	0.8393	208.897
GRMZM2G090500	1393	3244	0.9473	84.8152
GRMZM2G144726	1392	2513	0.7501	109.408
GRMZM2G063060	1391	2890	0.8581	95.0676
GRMZM2G145236	1388	2752	0.9339	99.6195
GRMZM2G159724	1383	2489	0.8542	109.749
GRMZM5G839757	1382	1986	0.9794	137.446
GRMZM2G178822	1381	2638	0.9306	103.4
GRMZM2G143591	1381	3375	0.9013	80.8208
GRMZM5G881464	1379	3191	0.9759	85.3573
GRMZM2G415359	1377	1693	0.8624	160.65
GRMZM2G155954	1374	2178	0.9279	124.604
GRMZM2G043056	1374	2908	0.8669	93.3245
GRMZM5G892645	1373	2111	0.9119	128.465
GRMZM2G104400	1373	2626	0.8945	103.271
GRMZM2G073498	1369	2231	0.8879	121.201
GRMZM2G385925	1369	3448	0.9606	78.4223
GRMZM2G057450	1366	2114	0.9314	127.629
GRMZM2G030016	1366	1145	0.7528	235.64
GRMZM2G012030	1366	6999	0.7194	38.5494
GRMZM2G060886	1364	2198	0.8644	122.572
GRMZM2G169384	1363	1793	0.894	150.148
GRMZM2G345055	1362	3054	0.964	88.0869
GRMZM2G181359	1360	1723	0.9675	155.904
GRMZM2G079013	1359	3062	0.9768	87.6633
GRMZM2G011588	1357	2952	0.9485	90.796
GRMZM5G830436	1357	2041	0.9412	131.323
GRMZM2G308203	1356	2934	0.9738	91.2857
GRMZM2G009871	1353	2200	0.9741	121.473
GRMZM2G099452	1349	3088	0.9725	86.2855
GRMZM2G011070	1348	4285	0.9622	62.1359
GRMZM2G107082	1346	1660	0.956	160.155
GRMZM2G039454	1346	3691	0.9157	72.0285
GRMZM2G011355	1345	1739	0.4054	152.766
GRMZM2G013619	1341	1762	0.7287	150.323
GRMZM2G157018	1341	1001	0.9461	264.605
GRMZM2G156068	1336	1230	0.8455	214.538
GRMZM2G181192	1334	1402	0.9458	187.936
AC217358.3	1333	1935	0.8904	136.067
GRMZM2G472625	1330	2210	0.8149	118.867
GRMZM2G069095	1329	3105	0.8725	84.5409
GRMZM2G316635	1328	5107	0.8798	51.3612
GRMZM2G139874	1328	2010	0.8945	130.498
GRMZM2G113202	1327	3966	0.8593	66.0878
AC217050.4	1327	2667	0.4983	98.2768
GRMZM2G116135	1325	1070	0.915	244.588
GRMZM2G014240	1324	2894	0.9053	90.3634
GRMZM2G469523	1320	1126	0.9494	231.547
GRMZM2G017249	1320	1789	0.9978	145.736
GRMZM2G180283	1319	1570	0.958	165.939
AC233895.1	1315	1185	0.9899	219.185
GRMZM2G174619	1315	2185	0.9643	118.871
GRMZM2G350447	1315	5927	0.9332	43.8222
GRMZM2G010054	1313	4159	0.9495	62.3561
GRMZM2G035417	1312	2025	0.8025	127.971
GRMZM2G177631	1311	4406	0.7921	58.7708
GRMZM2G070054	1309	2183	0.9574	118.437
GRMZM2G059151	1309	2322	0.9139	111.348
GRMZM2G121649	1309	3066	0.8757	84.3278
GRMZM2G014914	1309	1957	0.6122	132.115
GRMZM2G124434	1308	1546	0.9411	167.11
GRMZM2G024576	1307	3466	0.998	74.4818
GRMZM2G423861	1304	4546	0.925	56.6567
GRMZM2G044027	1304	2234	0.6173	115.292
GRMZM2G387076	1303	1646	0.3913	156.357
GRMZM2G160237	1302	2146	0.884	119.835
GRMZM2G078985	1300	1444	0.8102	177.82
GRMZM2G079236	1299	2981	0.9195	86.0697
GRMZM2G021270	1299	4534	0.9729	56.5889
GRMZM2G312110	1298	8706	0.9541	29.4482
GRMZM2G085577	1298	2881	0.9684	88.9887
GRMZM2G090087	1296	2132	0.993	120.066
GRMZM2G001895	1296	6485	0.9278	39.4728
GRMZM2G068217	1294	4719	0.9697	54.1611
GRMZM5G886969	1293	1969	0.9198	129.705
GRMZM2G008356	1291	3382	0.9589	75.3973
GRMZM2G417455	1287	3244	0.9923	78.3612
GRMZM2G017351	1287	1817	0.9312	139.903
GRMZM5G850455	1285	1265	0.9628	200.639
GRMZM2G060296	1283	2322	0.9354	109.136
GRMZM2G102499	1280	2206	0.5902	114.606
GRMZM2G124886	1278	3688	0.9317	68.4452
GRMZM2G073755	1274	1652	0.5999	152.322
GRMZM2G104325	1271	3579	0.8066	70.1435
GRMZM5G803952	1270	970	0.9258	258.604
GRMZM2G472346	1270	1869	0.9363	134.214
GRMZM2G118403	1270	5495	0.9887	45.6498
GRMZM2G061096	1270	2608	0.9064	96.1832
GRMZM2G035741	1268	1780	0.7596	140.703
GRMZM2G051917	1268	2706	0.946	92.5539
GRMZM2G430600	1267	1954	0.8342	128.072
GRMZM2G111818	1267	3859	0.9344	64.8493
GRMZM2G363038	1264	4873	0.9251	51.2335
GRMZM2G172369	1263	3453	0.9279	72.2454
GRMZM5G872147	1262	2507	0.9202	99.4279
GRMZM2G461356	1261	2972	0.9277	83.8049
AC149475.2	1260	4569	0.8531	54.4694
GRMZM2G079823	1260	2709	0.9572	91.8681
GRMZM2G101446	1260	1182	0.6201	210.551
GRMZM2G016447	1259	1708	0.8718	145.593
GRMZM2G169688	1259	2801	0.9614	88.7802
GRMZM2G083716	1258	2879	0.7714	86.3063
GRMZM2G409312	1258	1849	0.9778	134.384
GRMZM2G137348	1258	3537	0.8502	70.2504
GRMZM2G171426	1258	852	0.9167	291.638
GRMZM5G830403	1257	1318	0.9545	188.375
GRMZM2G303374	1256	1992	0.2992	124.538
GRMZM2G069916	1255	2521	0.8977	98.3273
GRMZM2G479885	1255	1558	0.9166	159.103
GRMZM2G163138	1252	2816	0.8569	87.8163
GRMZM2G042118	1252	1393	0.6949	177.524
GRMZM2G024612	1249	8129	0.9712	30.3479
GRMZM2G056270	1248	1608	0.8626	153.296
GRMZM2G181104	1248	2417	0.9396	101.986
GRMZM2G025242	1245	1637	0.8662	150.219
GRMZM2G702026	1244	2832	0.9237	86.7622
GRMZM2G409224	1243	5922	0.8889	41.4578
AC199526.5	1242	2259	0.5286	108.595
GRMZM2G439339	1241	6614	0.9282	37.0605
GRMZM5G859592	1241	1072	0.9235	228.655
GRMZM2G001327	1240	2595	0.4378	94.3817
GRMZM2G179097	1239	3173	0.9448	77.1267
GRMZM2G003306	1238	921	0.8002	265.5
GRMZM2G013890	1238	3239	0.9454	75.4941
GRMZM2G025095	1238	1923	0.9126	127.158
GRMZM2G107116	1237	4665	0.9413	52.3747
GRMZM2G036765	1236	2793	0.9291	87.4079
GRMZM2G362850	1236	3642	0.9357	67.0319
GRMZM2G166035	1233	1751	0.8407	139.085
GRMZM5G821988	1229	2262	0.9854	107.316
GRMZM2G036034	1225	3563	0.7915	67.9084
GRMZM2G033570	1225	2707	0.9209	89.3822
GRMZM2G099167	1223	1984	0.8881	121.755
GRMZM2G063850	1223	2761	0.8794	87.491
GRMZM2G073567	1220	1636	0.9358	147.292
GRMZM2G027663	1219	2669	0.9963	90.2108
GRMZM5G810275	1219	1744	0.9742	138.058
GRMZM2G421829	1214	3970	0.9607	60.3992
GRMZM2G066460	1214	1365	0.8645	175.667
GRMZM2G166658	1211	2272	0.8768	105.278
GRMZM2G013324	1209	2838	0.9718	84.1429
GRMZM2G305027	1206	1101	0.8629	216.353
GRMZM2G104017	1205	1786	0.6702	133.263
GRMZM5G866843	1203	2317	0.9694	102.552
GRMZM2G143354	1203	2108	0.9274	112.719
GRMZM2G156785	1203	1230	0.6951	193.181
GRMZM2G047813	1203	1646	0.4745	144.357
GRMZM2G012319	1203	4260	0.8472	55.7775
GRMZM2G462803	1202	6114	0.8078	38.8313
GRMZM2G342515	1201	1161	0.6658	204.322
GRMZM2G056645	1201	8354	0.9496	28.3957
GRMZM2G090338	1200	2420	0.964	97.942
GRMZM2G060540	1200	1789	0.9799	132.487
GRMZM2G167932	1199	1794	0.8946	132.008
GRMZM2G106308	1199	3051	0.9476	77.6212
GRMZM5G858454	1199	3201	0.7604	73.9838
GRMZM2G091481	1199	2242	0.7538	105.63
GRMZM2G160032	1198	2613	0.8875	90.5567
GRMZM2G433333	1198	5885	0.9271	40.2081
GRMZM2G148200	1198	2857	0.9107	82.8228
GRMZM2G086489	1197	2700	0.8522	87.5656
GRMZM2G056569	1196	1734	0.94	136.234
GRMZM2G166089	1195	2796	0.9456	84.4178
GRMZM2G179336	1194	3468	0.8512	68.0031
GRMZM5G840955	1194	1263	0.9367	186.726
GRMZM2G420713	1193	1714	0.5158	137.478
GRMZM2G161611	1192	1758	0.9107	133.925
GRMZM2G146589	1192	2585	0.9551	91.0792
GRMZM2G122135	1191	2270	0.9784	103.631
GRMZM2G078143	1191	1948	0.9174	120.761
GRMZM2G172244	1188	1097	0.7475	213.901
GRMZM2G060987	1188	1977	0.8184	118.69
GRMZM2G178227	1186	2042	0.6827	114.718
GRMZM2G012501	1186	5122	0.8467	45.735
GRMZM2G068471	1185	2420	0.6558	96.7178
GRMZM2G089743	1184	1777	0.9747	131.604
GRMZM2G002416	1183	1705	0.8721	137.045
GRMZM2G151252	1182	1745	0.6562	133.791
GRMZM2G054123	1181	1838	0.8406	126.913
GRMZM2G335521	1180	1015	0.9409	229.625
GRMZM2G017414	1180	3289	0.7787	70.8633
GRMZM5G814700	1180	1810	0.9249	128.768
GRMZM2G021483	1179	4691	0.9024	49.6423
GRMZM2G084181	1178	5156	0.992	45.1269
GRMZM2G014788	1178	3986	0.9877	58.3729
GRMZM2G092947	1174	5260	0.9376	44.0845
GRMZM2G423456	1173	4319	0.9199	53.6436
GRMZM2G010868	1171	1704	0.4577	135.735
GRMZM2G061562	1170	3776	0.9131	61.2008
GRMZM2G130375	1170	3083	0.8531	74.9576
GRMZM2G063676	1169	3386	0.8875	68.1916
GRMZM2G106213	1167	2210	0.886	104.299
GRMZM2G074589	1166	2247	0.9706	102.494
GRMZM2G125411	1164	2532	0.8874	90.8014
GRMZM2G032409	1164	2211	0.9905	103.984
GRMZM2G001652	1163	3697	0.9129	62.1346
GRMZM2G026793	1163	1716	0.8596	133.865
GRMZM2G115674	1161	1891	0.9032	121.267
GRMZM2G177781	1161	2587	0.9606	88.6419
GRMZM2G167031	1161	3671	0.9297	62.4671
GRMZM2G109425	1160	2079	0.9909	110.206
GRMZM2G034362	1159	3733	0.993	61.3238
GRMZM2G073521	1158	2931	0.9724	78.0362
GRMZM2G147811	1157	4439	0.9223	51.4815
GRMZM5G864414	1154	2755	0.9837	82.7347
GRMZM2G019236	1153	3864	0.9273	58.938
GRMZM2G157470	1152	1673	0.9737	136.007
GRMZM2G083459	1151	1995	0.9198	113.956
GRMZM2G351125	1149	4361	0.9353	52.04
GRMZM2G154523	1149	1780	0.8697	127.498
GRMZM2G008410	1149	1900	0.8132	119.445
GRMZM2G048294	1147	4073	0.9349	55.6227
GRMZM2G124239	1146	2806	0.9398	80.6678
GRMZM2G082823	1146	3121	0.8971	72.5261
GRMZM2G168762	1144	1331	0.9016	169.766
GRMZM2G116086	1143	2974	0.9028	75.9117
GRMZM2G418515	1143	5385	0.8722	41.9241
GRMZM2G100225	1143	1259	0.7975	179.318
AC207628.4	1143	5469	0.1042	41.2802
GRMZM2G005938	1143	2210	0.9312	102.154
GRMZM2G099295	1142	1406	0.9374	160.429
GRMZM2G070075	1142	3004	0.975	75.0878
GRMZM2G085530	1140	3503	0.9301	64.2788
GRMZM2G181362	1139	3731	0.9587	60.2978
GRMZM2G001500	1137	2654	0.9367	84.618
GRMZM2G033130	1134	3621	0.823	61.8569
GRMZM5G835213	1132	2521	0.6914	88.6905
GRMZM5G825854	1131	2735	0.9854	81.6787
GRMZM2G147145	1130	2412	0.8321	92.5347
GRMZM2G036464	1127	1629	0.9306	136.649
GRMZM2G092578	1125	1098	0.7596	202.373
GRMZM5G827266	1122	1042	0.5134	212.681
GRMZM2G310115	1120	3289	0.9453	67.2601
GRMZM2G317900	1120	3231	0.9814	68.4675
GRMZM2G101874	1119	2408	0.9207	91.7861
GRMZM5G831993	1118	1838	0.9423	120.143
GRMZM2G402002	1118	3537	0.9649	62.4324
GRMZM2G118355	1118	1120	0.6652	197.164
GRMZM2G106133	1117	1193	0.9807	184.934
GRMZM2G060045	1117	4718	0.911	46.7626
GRMZM2G147422	1115	2365	0.9091	93.1209
GRMZM2G091715	1111	868	0.7005	252.812
GRMZM2G410479	1111	5510	0.9309	39.8259
GRMZM2G158568	1110	2285	0.5479	95.9489
GRMZM2G343916	1110	3866	0.9933	56.7106
GRMZM2G057823	1109	1697	0.9146	129.078
GRMZM2G152686	1108	2231	0.9399	98.0942
GRMZM2G089406	1107	5242	0.9752	41.7113
GRMZM2G375504	1106	2872	0.9464	76.0631
GRMZM2G144971	1103	5683	0.9506	38.3355
GRMZM2G162688	1102	2194	0.9371	99.2084
GRMZM2G153393	1101	2703	0.8912	80.4534
GRMZM2G060213	1100	3967	0.974	54.7689
GRMZM2G126821	1098	2042	0.88	106.206
GRMZM2G051792	1097	3803	0.9227	56.9749
GRMZM2G151193	1097	1785	0.8835	121.387
GRMZM2G161868	1096	2068	0.6794	104.68
GRMZM2G032049	1095	3194	0.9336	67.7146
GRMZM2G095252	1095	1326	0.9291	163.107
GRMZM2G041878	1094	2908	0.978	74.3064
GRMZM2G469111	1093	2745	0.9741	78.6468
AC205703.4	1093	3462	0.9471	62.3586
GRMZM2G112805	1093	1357	0.9381	159.09
GRMZM2G112285	1092	819	0.9353	263.355
GRMZM2G135588	1092	2272	0.8596	94.9331
GRMZM2G122937	1091	1333	0.7802	161.658
GRMZM2G013114	1091	3335	0.9526	64.6148
GRMZM5G829840	1090	1601	0.8988	134.474
GRMZM2G384439	1090	2959	0.8892	72.7587
GRMZM2G081102	1089	1034	0.8946	208.023
GRMZM2G126545	1087	2540	0.7787	84.5277
GRMZM2G304362	1085	3366	0.863	63.6677
GRMZM2G177324	1085	2684	0.9244	79.8455
GRMZM2G164696	1084	1805	0.918	118.619
GRMZM2G317584	1083	2458	0.9764	87.0262
GRMZM2G049141	1081	6055	0.969	35.2626
GRMZM2G128176	1081	6450	0.8101	33.1031
GRMZM2G054221	1081	1769	0.8966	120.698
GRMZM2G366392	1080	2055	0.8706	103.804
GRMZM2G161335	1080	1811	0.9713	117.79
GRMZM5G813217	1080	2747	0.9694	77.6548
GRMZM2G449355	1080	3800	0.9682	56.1363
GRMZM2G019183	1080	4551	0.8266	46.8727
GRMZM2G106263	1080	2270	0.7978	93.9726
GRMZM2G336815	1080	1739	0.9396	122.667
GRMZM2G156986	1079	2458	0.9748	86.7047
GRMZM2G321767	1077	4286	0.8563	49.6326
GRMZM5G850966	1077	596	0.9295	356.922
GRMZM2G341732	1076	2811	0.9353	75.6057
GRMZM2G076705	1075	2745	0.9756	77.3516
GRMZM2G100913	1075	2297	0.9512	92.4381
GRMZM5G829778	1074	1660	0.8976	127.791
GRMZM2G081812	1074	1699	0.9052	124.857
GRMZM2G021331	1074	2290	0.8607	92.6344
GRMZM2G415215	1073	7897	0.9549	26.8374
AC199782.5	1072	1648	0.1044	128.482
GRMZM2G014750	1072	2068	0.7273	102.388
GRMZM2G150484	1071	3373	0.9348	62.7157
GRMZM2G061681	1070	3471	0.9499	60.8881
GRMZM2G044800	1070	865	0.8798	244.327
GRMZM2G017229	1069	1996	0.9469	105.784
GRMZM2G040477	1068	1473	0.8764	143.209
GRMZM2G003424	1068	2762	0.8168	76.3749
GRMZM2G029194	1065	4200	0.9479	50.0845
GRMZM2G054300	1064	2013	0.5951	104.4
GRMZM2G137694	1064	1855	0.9536	113.292
GRMZM2G437119	1063	2247	0.8656	93.4401
GRMZM2G099337	1062	5106	0.9651	41.0816
GRMZM2G071589	1062	2557	0.9085	82.0346
GRMZM2G112336	1062	3910	0.8688	53.6477
GRMZM2G316967	1062	3804	0.9508	55.1426
GRMZM2G369939	1062	2194	0.9562	95.6073
GRMZM2G062914	1061	1779	0.9162	117.799
GRMZM2G103079	1059	5403	0.9948	38.7137
GRMZM2G081380	1058	2628	0.957	79.5177
GRMZM2G363535	1058	5101	0.9837	40.967
GRMZM2G077233	1057	3870	0.6571	53.947
GRMZM2G046932	1057	2716	0.9433	76.8685
GRMZM2G344924	1056	3141	0.9519	66.4048
GRMZM2G029186	1056	4584	0.947	45.5012
GRMZM2G083243	1056	2010	0.898	103.77
GRMZM2G019050	1054	3290	0.9429	63.2773
GRMZM2G114459	1053	7418	0.9391	28.0379
GRMZM2G157462	1050	3384	0.9409	61.2861
GRMZM2G088231	1047	2239	0.9669	92.3625
GRMZM2G448104	1047	4264	0.9383	48.499
GRMZM2G137479	1045	2012	0.9607	102.587
GRMZM2G135283	1043	2224	0.8332	92.6302
GRMZM2G001084	1043	3072	0.751	67.0604
GRMZM2G329300	1042	4651	0.9015	44.2512
GRMZM2G171387	1042	1005	0.8338	204.788
GRMZM2G043350	1041	1931	0.7628	106.481
GRMZM2G010342	1041	5035	0.9762	40.8371
GRMZM2G321725	1039	2109	0.7568	97.3066
GRMZM2G013457	1039	649	0.9692	316.209
GRMZM2G156145	1038	3812	0.829	53.7833
GRMZM2G457381	1037	3435	0.9659	59.6287
GRMZM2G145715	1037	2069	0.8763	98.9969
GRMZM2G178576	1035	2021	0.4399	101.153
GRMZM2G096548	1034	2103	0.8902	97.1146
GRMZM2G114706	1034	2610	0.9613	78.2498
GRMZM2G066222	1033	1234	0.6856	165.344
GRMZM2G480171	1031	3813	0.9434	53.4066
AC233949.1	1030	2538	0.8522	80.1584
GRMZM2G178294	1030	3120	0.9628	65.2058
GRMZM5G800112	1030	903	0.9291	225.296
GRMZM2G107499	1029	3079	0.6924	66.0099
GRMZM2G110378	1027	2004	0.737	101.222
GRMZM2G016894	1025	2357	0.8999	85.8949
GRMZM2G103430	1024	2032	0.9537	99.5359
GRMZM2G146951	1024	2476	0.9685	81.6869
GRMZM2G030784	1024	1700	0.7012	118.975
GRMZM2G393471	1024	7061	0.9392	28.6442
GRMZM2G377369	1023	3517	0.9426	57.4522
GRMZM2G082174	1023	1994	0.9152	101.334
GRMZM2G166671	1022	2778	0.9536	72.6644
GRMZM2G151041	1021	3889	0.9131	51.8551
GRMZM2G146246	1020	1758	0.7804	114.6
GRMZM2G143008	1020	2305	0.9705	87.4043
GRMZM2G178968	1020	1167	0.8792	172.637
GRMZM2G104310	1019	3858	0.8103	52.1693
GRMZM2G146115	1018	1730	0.9665	116.226
AC198481.3	1018	2736	0.9828	73.4911
GRMZM2G089484	1017	2581	0.9702	77.8281
GRMZM2G064390	1017	2267	0.9312	88.608
GRMZM2G172258	1017	2617	0.9339	76.7575
GRMZM2G113720	1016	1450	0.6138	138.398
GRMZM2G168149	1016	1376	0.9019	145.841
GRMZM2G071630	1016	1696	0.8939	118.324
GRMZM2G341747	1015	3552	0.9749	56.4412
GRMZM2G477694	1015	3630	0.9455	55.2284
GRMZM2G179737	1015	1565	0.954	128.102
GRMZM2G147500	1014	1748	0.9325	114.578
GRMZM2G032163	1014	2871	0.9774	69.7603
GRMZM2G009845	1014	2553	0.9495	78.4495
GRMZM2G401869	1012	6555	0.9472	30.4938
GRMZM2G176397	1011	3788	0.8997	52.7162
GRMZM2G065532	1011	3063	0.923	65.194
GRMZM2G123371	1010	2949	0.7335	67.6472
GRMZM2G058522	1009	1552	0.8177	128.411
GRMZM5G869246	1008	1260	0.9857	158.013
GRMZM2G005459	1007	1966	0.8861	101.169
GRMZM2G435373	1006	1839	0.9462	108.049
GRMZM2G104294	1006	2673	0.8298	74.3365
GRMZM2G134385	1005	2782	0.9551	71.353
GRMZM2G181251	1005	4007	0.9102	49.5393
GRMZM2G304575	1005	923	0.9036	215.064
GRMZM2G167085	1005	1524	0.8976	130.252
GRMZM2G083437	1004	3274	0.9838	60.5701
GRMZM2G062354	1004	2848	0.9575	69.6301
GRMZM2G166963	1004	1200	0.6308	165.255
GRMZM2G163277	1003	5544	0.9313	35.7339
GRMZM5G872068	1002	1489	0.9201	132.916
GRMZM2G033876	1002	4308	0.9619	45.9405
GRMZM2G167872	1000	1672	0.9522	118.132
GRMZM2G126691	999	3847	0.9561	51.2916
GRMZM2G077307	999	3454	0.9175	57.1277
GRMZM2G149406	999	4720	0.8248	41.8049
GRMZM2G019325	998	815	0.9153	241.867
GRMZM2G464000	998	2968	0.939	66.4156
GRMZM2G095921	998	3253	0.9148	60.5968
GRMZM2G107696	998	3900	0.8459	50.544
GRMZM2G151387	997	2964	0.9656	66.4386
GRMZM2G415846	997	2276	0.9925	86.5219
GRMZM2G053458	996	1443	0.729	136.332
GRMZM2G321753	994	7094	0.9735	27.6757
GRMZM5G862540	994	1975	0.9803	99.4083
GRMZM2G056661	994	6099	0.8259	32.1907
GRMZM2G117870	993	3838	0.8775	51.1031
GRMZM2G027886	993	1965	0.9155	99.8137
GRMZM2G118917	993	3213	0.9412	61.0438
GRMZM2G347583	993	4955	0.9637	39.583
GRMZM2G065757	992	2521	0.5137	77.7217
GRMZM2G007681	991	5107	0.935	38.3276
GRMZM2G359038	990	2356	0.9261	82.9972
GRMZM2G104632	990	1760	0.9102	111.103
GRMZM2G110509	988	1813	0.7044	107.637
GRMZM2G103546	986	2559	0.9812	76.1044
GRMZM2G164562	986	1671	0.991	116.548
AC208110.2	986	4132	0.9206	47.1324
GRMZM2G145280	985	1036	0.8668	187.793
GRMZM2G169820	985	3885	0.9192	50.0782
GRMZM2G128914	985	2253	0.8779	86.3532
GRMZM2G172342	985	902	0.7395	215.691
GRMZM2G141679	985	2178	0.8935	89.3268
GRMZM2G152862	985	1923	0.8326	101.172
GRMZM2G047949	984	3544	0.8888	54.8409
GRMZM2G083095	984	2205	0.9524	88.1434
GRMZM2G327635	984	2934	0.7911	66.2427
GRMZM2G383623	983	4518	0.9137	42.9745
GRMZM2G172330	979	2774	0.9358	69.7075
GRMZM2G318475	978	1400	0.8979	137.979
GRMZM2G017654	978	4440	0.964	43.507
GRMZM2G043383	977	2116	0.8516	91.1973
GRMZM2G010302	977	1657	0.8811	116.46
GRMZM2G168096	977	6322	0.9736	30.5241
GRMZM2G132796	975	2659	0.8778	72.4252
GRMZM2G053781	973	2354	0.9469	81.6413
GRMZM2G165747	973	2834	0.9368	67.8135
GRMZM2G387890	972	3148	0.9508	60.9867
GRMZM2G009655	972	3548	0.9667	54.1111
GRMZM2G357804	971	2832	0.9926	67.7219
GRMZM2G137839	971	1354	0.7674	141.646
AC226230.2	970	4027	0.9747	47.5766
GRMZM2G165357	970	2098	0.6401	91.3208
GRMZM2G429982	969	1218	0.8054	157.137
GRMZM2G414496	969	3057	0.7537	62.6083
GRMZM2G023798	967	2688	0.9304	71.056
GRMZM2G138511	967	2753	0.9804	69.3783
GRMZM2G113928	967	2394	0.9256	79.7821
GRMZM2G166659	966	1831	0.6849	104.206
GRMZM2G414043	965	4725	0.9005	40.3393
GRMZM2G179421	965	2462	0.8408	77.4181
GRMZM5G852185	965	1637	0.5082	116.435
GRMZM2G324390	965	5311	0.965	35.8884
GRMZM2G051974	964	2749	0.9709	69.2637
GRMZM2G044143	963	8574	0.9276	22.1843
GRMZM2G012031	963	5502	0.9404	34.5708
GRMZM2G031360	963	4806	0.6269	39.5773
GRMZM2G111138	963	3062	0.9491	62.119
GRMZM2G121612	962	4008	0.9536	47.4079
AC196475.3	962	1902	0.9338	99.9005
GRMZM2G074158	960	3506	0.9601	54.0832
GRMZM2G000718	960	1403	0.928	135.15
GRMZM2G119175	960	2149	0.9013	88.2344
GRMZM2G132547	959	2543	0.932	74.4862
GRMZM2G313027	959	4306	0.934	43.9894
GRMZM2G462325	958	4113	0.7588	46.0055
GRMZM2G024354	958	1022	0.8493	185.148
GRMZM2G072088	957	4033	0.9437	46.8691
GRMZM2G399073	957	3370	0.768	56.09
GRMZM2G103230	956	3767	0.9596	50.1263
GRMZM2G116620	955	1386	0.9315	136.095
GRMZM2G102596	955	1403	0.809	134.446
GRMZM2G036609	955	5897	0.872	31.9872
GRMZM2G042074	954	3944	0.9597	47.7765
GRMZM2G062499	954	1797	0.9577	104.858
GRMZM2G472696	952	831	0.8857	226.276
GRMZM2G052088	951	1627	0.8789	115.451
GRMZM2G092741	950	2212	0.9295	84.8285
GRMZM2G167554	948	1937	0.8782	96.6678
GRMZM5G864319	947	2641	0.9091	70.8247
GRMZM2G127453	945	2333	0.8624	80.0056
GRMZM2G082191	944	4778	0.8292	39.0238
GRMZM2G451314	942	1922	0.8876	96.8057
GRMZM5G871143	942	3296	0.939	56.4504
GRMZM2G059039	941	2347	0.8722	79.1917
GRMZM2G107984	941	2324	0.9045	79.9755
GRMZM2G034083	941	1782	0.927	104.3
GRMZM2G056079	940	3283	0.9522	56.5536
GRMZM2G001887	940	991	0.9354	187.352
GRMZM2G095348	938	3442	0.9904	53.8264
GRMZM2G097249	938	3600	0.9586	51.464
GRMZM5G826911	937	2219	0.8499	83.4038
GRMZM2G013821	937	1061	0.8539	174.433
GRMZM2G012041	936	3955	0.9818	46.7447
GRMZM2G147243	936	2320	0.8522	79.6877
GRMZM2G140667	936	1312	0.7538	140.911
GRMZM2G176698	936	4892	0.8669	37.7914
GRMZM2G553314	935	2542	0.9406	72.6506
GRMZM2G007885	935	2849	0.7087	64.822
GRMZM2G104377	934	2755	0.9699	66.962
GRMZM2G073054	933	3066	0.9592	60.1053
GRMZM2G123587	933	5721	0.9754	32.2117
GRMZM2G173700	931	2802	0.9882	65.6273
GRMZM2G171688	931	2574	0.8629	71.4405
GRMZM2G024571	930	4598	0.883	39.95
GRMZM2G098577	926	3141	0.8727	58.2299
GRMZM2G341027	926	2439	0.9512	74.9899
GRMZM2G132903	925	2845	0.935	64.2189
GRMZM2G374574	925	6139	0.9383	29.761
GRMZM2G703490	924	1462	0.9535	124.833
GRMZM2G161913	924	4021	0.9346	45.388
GRMZM2G402936	924	1326	0.7383	137.636
GRMZM2G442195	923	2568	0.8162	70.9921
GRMZM2G063192	923	2071	0.9054	88.0288
GRMZM2G101760	923	3453	0.9508	52.7969
GRMZM2G050984	922	2354	0.983	77.362
GRMZM2G022206	922	1025	0.7893	177.668
GRMZM2G421279	921	857	0.7981	212.267
GRMZM2G042089	921	2160	0.913	84.2188
GRMZM2G133937	920	5468	0.9687	33.2325
GRMZM2G020940	920	1548	0.8521	117.387
GRMZM2G302913	919	3580	0.9385	50.7032
GRMZM2G131473	919	1922	0.9527	94.4421
GRMZM2G165817	919	1685	0.9163	107.726
GRMZM2G053652	919	1062	0.8635	170.921
GRMZM2G108149	918	3340	0.9452	54.2875
GRMZM2G157061	917	3109	0.9472	58.2575
GRMZM2G066528	917	895	0.8749	202.372
GRMZM2G024882	916	4365	0.989	41.449
GRMZM2G078314	916	1126	0.4636	160.679
GRMZM2G104418	915	1634	0.9259	110.604
GRMZM2G474798	914	8784	0.8911	20.5521
GRMZM2G022777	913	2505	0.6998	71.989
GRMZM2G052435	912	3891	0.9489	46.2953
GRMZM2G011101	910	3347	0.9137	53.7018
GRMZM2G132623	908	1368	0.4781	131.1
GRMZM2G028307	908	2453	0.967	73.1125
GRMZM2G143568	908	2946	0.9627	60.8774
GRMZM2G139977	908	6022	0.9419	29.7816
GRMZM2G095763	908	2598	0.9403	69.0319
GRMZM2G151087	907	1511	0.9385	118.562
GRMZM2G146267	906	4485	0.8736	39.8996
GRMZM5G833124	906	2163	0.8955	82.7323
GRMZM2G099628	905	2729	0.9362	65.5011
GRMZM2G156568	905	2049	0.8336	87.2388
GRMZM2G003963	904	1730	0.8503	103.211
AC215244.3	903	1558	0.9589	114.478
GRMZM2G024811	902	2097	0.9251	84.9594
GRMZM2G163912	902	2060	0.8029	86.4854
GRMZM5G868433	902	1363	0.8914	130.712
GRMZM2G084149	901	1880	0.9622	94.6608
GRMZM2G163888	900	3110	0.9299	57.1591
GRMZM2G416120	900	2409	0.8888	73.792
GRMZM2G022365	899	2453	0.724	72.3878
GRMZM2G141258	899	6058	0.9211	29.3112
GRMZM2G135978	899	2449	0.8371	72.506
GRMZM2G055619	898	5813	0.4499	30.5126
GRMZM2G153722	898	6166	0.9205	28.7658
GRMZM2G045987	897	3151	0.8867	56.2273
GRMZM2G412611	897	4688	0.9324	37.7927
GRMZM2G335126	897	7014	0.9535	25.2598
GRMZM2G083689	896	2970	0.9865	59.5875
GRMZM5G892758	896	2686	0.8984	65.8878
GRMZM2G098298	896	1571	0.9013	112.651
GRMZM2G099187	895	2931	0.6506	60.3129
GRMZM2G386971	895	2713	0.9536	65.1593
GRMZM2G433942	895	1836	0.8922	96.2839
GRMZM2G317652	895	2804	0.9765	63.0447
GRMZM2G071441	894	3471	0.8709	50.8729
GRMZM2G152470	894	1943	0.7761	90.8799
GRMZM2G316113	892	4409	0.3577	39.9602
GRMZM2G137236	892	3916	0.8636	44.991
GRMZM2G128658	891	3101	0.9255	56.7517
GRMZM2G108829	891	2734	0.6968	64.3699
GRMZM5G806449	891	1974	0.9362	89.1526
GRMZM2G018775	890	4047	0.6395	43.437
GRMZM5G899800	890	1509	0.8701	116.494
GRMZM5G824944	890	2344	0.8929	74.9956
GRMZM2G441583	889	3795	0.9726	46.2693
GRMZM2G127665	889	3914	0.4443	44.8626
GRMZM2G104025	889	1394	0.8429	125.963
GRMZM2G481843	889	1768	0.8054	99.3168
GRMZM2G450163	888	2430	0.9033	72.1789
GRMZM2G014902	888	2901	0.9197	60.4601
GRMZM2G006474	887	4637	0.837	37.7824
GRMZM2G023585	887	2134	0.8988	82.098
GRMZM5G829738	887	2468	0.9716	70.9875
GRMZM2G095865	884	3148	0.8415	55.4652
GRMZM2G151236	884	3684	0.9349	47.3954
GRMZM2G406830	884	3654	0.8437	47.7845
GRMZM2G335638	884	3639	0.9008	47.9815
GRMZM2G173124	884	2200	0.8695	79.3657
GRMZM2G138676	884	2523	0.9263	69.2051
GRMZM2G424832	884	4055	0.8937	43.0591
GRMZM2G045070	882	2915	0.8549	59.7631
GRMZM2G019121	882	2159	0.8726	80.6899
GRMZM2G102000	881	3603	0.8818	48.2964
GRMZM2G003762	881	1733	0.6872	100.411
GRMZM2G001645	881	2554	0.8504	68.1331
GRMZM2G036092	881	1501	0.8674	115.931
GRMZM5G881775	881	2107	0.6545	82.5876
GRMZM2G063340	880	1168	0.6122	148.814
GRMZM2G067546	879	2731	0.9509	63.5727
GRMZM2G352415	877	1637	0.9682	105.817
GRMZM2G444808	877	4342	0.8699	39.8945
GRMZM2G412150	875	4110	0.9275	42.0503
GRMZM2G154595	874	1648	0.9393	104.751
GRMZM2G155123	874	3632	0.9199	47.5301
AC155377.1	874	5390	0.9564	32.0277
GRMZM2G073571	874	2496	0.8578	69.1624
GRMZM2G027862	873	1374	0.7962	125.496
GRMZM2G068476	872	2634	0.9757	65.3889
GRMZM5G863385	872	2643	0.9213	65.1662
GRMZM2G541193	872	2664	0.9932	64.6525
GRMZM2G044963	871	1084	0.7611	158.706
GRMZM2G143651	871	2232	0.6416	77.0774
GRMZM2G159369	870	1798	0.7414	95.5725
GRMZM2G046924	870	1861	0.813	92.3371
GRMZM2G375904	870	2600	0.8235	66.092
GRMZM5G832989	870	2386	0.9677	72.0198
GRMZM2G134396	870	2969	0.9734	57.8778
GRMZM2G019999	870	1618	0.8807	106.205
GRMZM2G176647	870	3659	0.9369	46.9635
GRMZM5G855347	868	3395	0.7193	50.4991
GRMZM2G052890	867	1287	0.9751	133.059
GRMZM2G017257	867	4294	0.9464	39.8805
GRMZM2G352159	866	3181	0.9745	53.7722
GRMZM2G124576	866	2570	0.8611	66.5561
GRMZM2G004057	865	2592	0.8924	65.915
GRMZM2G092895	865	2270	0.8899	75.2651
GRMZM2G128057	865	2920	0.8301	58.5109
GRMZM2G117582	864	1848	0.4535	92.3454
GRMZM2G070542	864	2840	0.7067	60.0895
GRMZM5G827171	863	2221	0.8343	76.7477
GRMZM2G055276	863	1908	0.5136	89.3379
GRMZM2G153792	863	4527	0.9733	37.6533
GRMZM2G141399	862	6035	0.8855	28.212
GRMZM2G469795	862	4935	0.9704	34.5003
GRMZM2G344967	862	6776	0.9596	25.1268
GRMZM2G175419	861	1523	0.9823	111.662
GRMZM2G152421	861	2024	0.7969	84.0226
GRMZM2G128737	861	3878	0.7705	43.8529
GRMZM2G050647	860	3770	0.8647	45.0568
GRMZM2G041275	860	2276	0.9622	74.6328
GRMZM2G155931	860	938	0.8316	181.092
GRMZM2G139617	859	2195	0.8711	77.2969
GRMZM2G099630	858	3835	0.9528	44.1901
GRMZM2G132468	858	2580	0.9566	65.6857
GRMZM2G109121	858	2357	0.9504	71.9004
GRMZM2G060702	858	2272	0.3499	74.5903
GRMZM2G091258	857	3657	0.91	46.287
AC217401.3	857	2060	0.8845	82.1707
GRMZM2G166281	855	2328	0.5524	72.5415
GRMZM2G177621	855	2524	0.9695	66.9083
GRMZM2G000923	854	1093	0.8875	154.327
GRMZM2G078379	853	4793	0.9798	35.1516
GRMZM2G009448	851	1325	0.8838	126.858
GRMZM2G110714	851	3172	0.9637	52.9907
GRMZM2G048067	851	4894	0.9579	34.3454
AC194970.5	851	2166	0.7295	77.6023
GRMZM2G464976	850	4146	0.8985	40.4942
GRMZM5G895175	849	3548	0.9191	47.2637
GRMZM2G469162	849	4107	0.9715	40.8307
GRMZM2G348666	848	4087	0.8838	40.9821
GRMZM2G128171	848	2208	0.6517	75.8578
GRMZM2G308707	848	3190	0.9248	52.5059
GRMZM2G443814	848	4100	0.89	40.8522
GRMZM2G167809	847	1768	0.8682	94.6247
GRMZM2G452633	847	1756	0.9858	95.2713
GRMZM2G085246	846	2693	0.9825	62.0494
GRMZM2G110185	846	1844	0.9067	90.6176
GRMZM2G054821	846	3397	0.9155	49.1901
GRMZM2G146292	845	5169	0.9569	32.2889
GRMZM2G060726	845	2211	0.9616	75.4868
AC215690.3	844	1179	0.9958	141.394
GRMZM2G167957	844	1725	0.9791	96.6399
GRMZM2G029583	843	1943	0.8461	85.6955
GRMZM2G153704	843	5052	0.7318	32.9585
AC233961.1	840	2571	0.9821	64.5328
GRMZM2G177263	840	1661	0.7604	99.8879
GRMZM2G118003	840	2170	0.8604	76.458
GRMZM2G139374	839	2150	0.9293	77.0774
GRMZM2G113174	839	1957	0.9724	84.6788
GRMZM2G010406	839	1912	0.965	86.6717
GRMZM2G142640	839	861	0.8653	192.47
GRMZM2G107654	837	1906	0.9465	86.7373
GRMZM5G845736	837	843	0.6963	196.111
GRMZM2G110233	837	2596	0.7092	63.6831
GRMZM2G168330	835	706	0.9391	233.607
GRMZM2G134284	835	4147	0.8032	39.77
GRMZM2G038032	834	1398	0.9285	117.832
GRMZM2G150616	833	1437	0.9395	114.496
GRMZM2G117401	832	3472	0.8736	47.3311
GRMZM5G879278	832	2327	0.8956	70.6204
GRMZM2G100288	831	3368	0.88	48.734
GRMZM2G180575	831	2327	0.7761	70.5355
GRMZM2G111720	830	3993	0.8067	41.0565
GRMZM2G169095	830	2569	0.8848	63.8142
GRMZM2G474459	830	9064	0.1333	18.0868
GRMZM2G050193	830	2100	0.8986	78.066
GRMZM5G825524	830	2906	0.9322	56.4139
GRMZM2G064374	829	2200	0.9677	74.4278
GRMZM2G117642	829	1009	0.8811	162.281
GRMZM2G037698	828	2279	0.9162	71.7611
GRMZM2G016511	828	1149	0.8886	142.336
GRMZM2G127312	827	1271	0.9371	128.518
GRMZM2G009335	827	1914	0.9451	85.3428
GRMZM2G014180	827	2022	0.9436	80.7844
GRMZM2G146697	826	3560	0.9295	45.8283
GRMZM2G078569	826	3062	0.7962	53.2817
GRMZM2G162426	826	3685	0.924	44.2737
GRMZM2G049342	826	4146	0.9221	39.3508
GRMZM2G121221	825	1763	0.6194	92.4283
GRMZM2G081462	825	2113	0.7492	77.1184
GRMZM2G459746	825	3369	0.8976	48.3678
GRMZM2G082916	825	4837	0.9285	33.6885
GRMZM2G064695	824	1952	0.8873	83.3779
GRMZM2G077596	823	4192	0.9728	38.7777
GRMZM2G325575	822	1867	0.6722	86.9623
GRMZM2G171921	822	1887	0.9777	86.0406
GRMZM2G179301	822	1901	0.6092	85.4069
AC189879.3	821	2955	0.847	54.8768
GRMZM5G804382	821	1609	0.931	100.784
GRMZM2G038401	821	3100	0.8552	52.31
GRMZM5G851807	821	2558	0.9832	63.3937
GRMZM2G009849	821	4980	0.8518	32.5625
GRMZM2G029258	821	3926	0.9279	41.3044
GRMZM2G041381	821	1977	0.3728	82.0238
GRMZM5G891159	820	4616	0.8932	35.0874
GRMZM2G088753	820	3191	0.9129	50.7563
GRMZM2G141704	818	4754	0.284	33.9858
GRMZM2G331533	818	3405	0.8758	47.4504
GRMZM2G138230	817	4698	0.8963	34.3489
GRMZM2G005887	817	1929	0.7646	83.6552
GRMZM2G131756	817	3198	0.9203	50.46
GRMZM2G432722	816	3203	0.9797	50.3195
GRMZM2G049347	816	2142	0.9323	75.2444
GRMZM2G360339	815	815	0.854	197.516
GRMZM2G060611	815	3205	0.8955	50.2265
GRMZM2G179465	814	2616	0.9021	61.4596
GRMZM2G478709	814	2407	0.9219	66.7962
GRMZM2G098884	813	2348	0.9634	68.3905
GRMZM2G078832	813	2525	0.975	63.5964
GRMZM2G158872	813	3297	0.913	48.7052
GRMZM2G162786	813	2585	0.9447	62.1203
GRMZM2G028986	812	968	0.6798	165.685
GRMZM2G054559	812	3274	0.8561	48.987
GRMZM2G149321	812	2083	0.9942	76.9963
GRMZM2G042502	812	2323	0.9311	69.0415
GRMZM2G104847	812	2451	0.9547	65.4359
GRMZM2G025387	811	2055	0.8871	77.9493
GRMZM2G150160	811	1744	0.9071	91.8497
GRMZM5G855672	811	1185	0.984	135.178
GRMZM2G136803	810	1816	0.9879	88.0993
GRMZM2G066101	810	2859	0.9318	55.9595
AC149829.2	810	3075	0.8488	52.0287
GRMZM2G009936	810	1048	0.5496	152.661
GRMZM2G006130	810	3931	0.4093	40.6991
GRMZM2G033138	809	2885	0.9861	55.3868
GRMZM2G166507	809	4172	0.8641	38.3008
GRMZM2G162184	809	3400	0.9803	46.9973
GRMZM2G105004	809	3979	0.905	40.1585
GRMZM5G854613	808	2045	0.9853	78.0407
GRMZM2G032339	807	1575	0.9733	101.204
GRMZM2G163939	807	912	0.8366	174.776
GRMZM2G550865	807	2089	0.8875	76.3024
GRMZM2G069886	805	4472	0.9108	35.5547
GRMZM2G012690	805	1725	0.8928	92.1744
GRMZM2G125728	804	2633	0.9047	60.3127
GRMZM2G116204	804	1097	0.8049	144.761
GRMZM2G053239	804	2392	0.9548	66.3893
GRMZM5G820122	804	3366	0.8642	47.1786
GRMZM2G126038	804	2781	0.8087	57.1029
GRMZM2G118286	802	2591	0.8966	61.1379
GRMZM2G080937	800	2465	0.8763	64.1027
GRMZM2G355771	800	4352	0.9864	36.3082
GRMZM2G063942	800	2345	0.7659	67.383
GRMZM2G057380	800	4903	0.9209	32.2279
GRMZM5G878615	800	2538	0.7124	62.2589
GRMZM2G065928	800	2286	0.8626	69.1221
GRMZM2G109284	799	3260	0.9258	48.4097
GRMZM2G087186	799	2506	0.8484	62.9751
GRMZM2G141432	799	1560	0.509	101.164
GRMZM2G154007	798	1856	0.9671	84.9236
GRMZM2G063328	798	1576	0.8744	100.012
GRMZM2G127949	798	2424	0.9447	65.024
GRMZM2G018416	798	2895	0.9661	54.445
GRMZM2G145360	797	4083	0.9241	38.5551
GRMZM2G026065	797	2419	0.9686	65.0767
GRMZM5G887631	796	2793	0.9019	56.2918
GRMZM2G145905	796	3002	0.9837	52.3728
GRMZM2G146173	796	925	0.9124	169.971
GRMZM2G098496	796	1435	0.9436	109.563
GRMZM2G314133	796	5197	0.8999	30.2527
AC209206.3	795	3279	0.9594	47.8883
GRMZM2G126120	795	3907	0.8928	40.1908
GRMZM2G009443	794	3270	0.9526	47.9597
GRMZM2G113156	794	2217	0.9319	70.7389
GRMZM5G834205	794	2090	0.8043	75.0374
GRMZM2G022383	793	3304	0.9413	47.4063
GRMZM2G098076	793	2352	0.96	66.5946
GRMZM2G069765	793	2361	0.9212	66.3408
GRMZM2G099056	792	3073	0.9095	50.9056
GRMZM2G098859	790	4849	0.8812	32.1794
AC209835.4	790	1398	0.216	111.615
GRMZM2G701082	789	2080	0.7923	74.9233
GRMZM2G008263	789	2799	0.7974	55.6772
GRMZM5G866100	789	1903	0.9322	81.892
GRMZM2G153769	789	1669	0.9641	93.3736
GRMZM2G107571	789	2974	0.9001	52.401
GRMZM2G395844	788	1205	0.5651	129.164
GRMZM2G172101	787	4279	0.8563	36.3275
GRMZM2G178618	787	3115	0.9512	49.9022
GRMZM2G034025	787	7747	0.9273	20.0652
GRMZM2G022061	787	2476	0.92	62.7809
GRMZM2G088511	787	659	0.305	235.881
GRMZM2G099363	787	2185	0.665	71.1421
GRMZM2G030167	786	1270	0.8772	122.242
GRMZM2G178650	786	2421	0.9157	64.1255
GRMZM2G094388	786	1213	0.8838	127.987
GRMZM2G362718	785	3479	0.9388	44.5675
GRMZM2G091632	785	2967	0.9858	52.2583
GRMZM2G130854	785	2358	0.9279	65.7551
GRMZM2G179941	785	3717	0.9319	41.7139
GRMZM2G463730	784	4174	0.8493	37.0994
GRMZM2G070422	784	1696	0.944	91.3048
GRMZM2G092959	784	2183	0.9372	70.9358
AC206259.3	784	3704	0.6822	41.8069
GRMZM2G040079	783	4099	0.9671	37.73
GRMZM2G118014	783	2828	0.8929	54.6872
GRMZM2G075637	783	1487	0.7861	104.005
GRMZM2G416308	783	2507	0.8628	61.6894
GRMZM2G175642	783	1805	0.9623	85.6817
GRMZM2G012964	781	3686	0.8345	41.8503
GRMZM2G028353	781	4227	0.8957	36.4941
GRMZM2G148709	781	2304	0.9097	66.9533
GRMZM2G126266	781	2181	0.967	70.7292
GRMZM2G114182	781	4532	0.8901	34.038
GRMZM2G050649	780	2229	0.8654	69.1175
GRMZM2G149768	779	2283	0.3732	67.3961
GRMZM2G025340	779	3741	0.9428	41.1295
GRMZM2G030915	778	1408	0.581	109.139
GRMZM2G049329	777	3017	0.9483	50.8685
GRMZM2G303655	777	2632	0.9533	58.3094
GRMZM2G132847	777	5073	0.9152	30.2524
GRMZM2G045330	776	3408	0.5692	44.9744
GRMZM2G422750	776	2217	0.5873	69.1352
GRMZM2G116658	775	3968	0.9289	38.5774
GRMZM2G075900	775	3569	0.9	42.8902
GRMZM2G000816	773	1854	0.9455	82.3518
GRMZM2G019363	773	1512	0.9021	100.979
GRMZM2G004459	772	2534	0.927	60.1747
GRMZM2G050218	772	1869	0.8502	81.5852
GRMZM2G009464	771	2224	0.8876	68.4736
GRMZM2G063949	771	1708	0.921	89.16
GRMZM2G173943	771	2131	0.871	71.4618
GRMZM2G058039	770	2324	0.8997	65.4422
GRMZM2G125148	769	2466	0.5166	61.5937
GRMZM2G179024	768	2524	0.9497	60.1001
GRMZM2G171604	768	1808	0.9447	83.9008
GRMZM2G073814	768	2378	0.8516	63.79
GRMZM2G012416	768	1960	0.9219	77.3942
GRMZM2G103137	768	2249	0.8599	67.4489
GRMZM2G090300	767	2144	0.8932	70.66
GRMZM5G853245	767	1905	0.9801	79.525
GRMZM2G054162	767	4060	0.8953	37.3141
AF466202.2	766	3033	0.6894	49.8838
GRMZM2G462613	766	3661	0.9142	41.3269
GRMZM2G109472	766	4100	0.7427	36.9019
GRMZM2G428242	766	7874	0.7758	19.2148
GRMZM2G166646	765	2051	0.9742	73.6714
GRMZM2G015384	765	2380	0.7273	63.4874
GRMZM2G086093	764	3047	0.8592	49.525
GRMZM2G329144	764	1018	0.9283	148.234
GRMZM2G176707	763	2125	0.8019	70.92
GRMZM2G099317	763	1881	0.715	80.1197
GRMZM2G701688	762	3729	0.9228	40.3614
GRMZM2G004377	762	2532	0.8231	59.4422
GRMZM2G159285	762	1503	0.9155	100.138
GRMZM2G058675	762	2342	0.8629	64.2645
GRMZM2G029559	761	1726	0.9085	87.0858
GRMZM2G154489	761	2306	0.8981	65.1821
GRMZM2G098058	761	1628	0.8679	92.328
GRMZM2G107757	760	1566	0.7497	95.8573
GRMZM2G063162	760	4493	0.6888	33.4103
GRMZM2G071089	759	1637	0.8125	91.5791
GRMZM2G032336	759	3254	0.9554	46.071
GRMZM5G864266	759	4070	0.8948	36.8342
GRMZM2G109383	759	2445	0.8425	61.3149
GRMZM5G848768	758	1977	0.8579	75.7296
GRMZM2G154312	758	1768	0.6985	84.6818
GRMZM2G057186	758	2184	0.9171	68.552
GRMZM2G019267	758	2431	0.8124	61.5868
GRMZM2G092327	757	2650	0.846	56.4226
GRMZM2G077208	757	1270	0.5205	117.732
GRMZM2G103955	757	1756	0.8838	85.148
GRMZM2G063909	757	1830	0.9322	81.7049
GRMZM2G084881	757	1995	0.8266	74.9474
GRMZM2G336962	756	4693	0.8873	31.8181
GRMZM2G002002	756	4877	0.9174	30.6177
GRMZM2G138178	756	3229	0.9167	46.2442
GRMZM2G154366	756	4384	0.9484	34.0608
GRMZM2G035118	755	3705	0.9636	40.2496
GRMZM2G022258	754	4062	0.8865	36.6636
GRMZM2G420310	754	2126	0.9172	70.0505
GRMZM2G060583	754	4213	0.9926	35.3495
GRMZM2G003038	754	1654	0.8761	90.0408
GRMZM2G045314	753	2360	0.8517	63.0211
GRMZM2G052658	752	4087	0.8515	36.3426
GRMZM5G871419	752	2736	0.9978	54.2882
GRMZM2G101515	752	3080	0.9737	48.2248
GRMZM2G034828	752	3725	0.9144	39.8745
GRMZM2G101523	752	3573	0.9771	41.5708
GRMZM5G813206	752	4110	0.9314	36.1393
GRMZM5G860498	751	909	0.9945	163.185
GRMZM2G140577	751	2864	0.8436	51.7929
GRMZM2G170798	751	3858	0.8512	38.4486
GRMZM5G808775	750	1486	0.961	99.6887
AC233910.1	750	2253	0.0826	65.7512
GRMZM2G160174	750	1337	0.8527	110.798
GRMZM2G177828	749	769	0.7412	192.379
GRMZM2G099186	749	1402	0.9757	105.521
GRMZM5G811797	749	2095	0.822	70.6157
GRMZM2G057402	749	8637	0.9225	17.1286
GRMZM2G111872	748	1563	0.8311	94.5248
GRMZM2G007276	748	1079	0.8767	136.925
GRMZM2G051677	748	1679	0.8696	87.9942
GRMZM2G129238	748	2067	0.9357	71.4767
GRMZM2G128056	747	2032	0.9518	72.6106
GRMZM2G012284	747	1623	0.9082	90.9087
GRMZM2G011631	746	5826	0.9346	25.2913
GRMZM2G096972	746	4281	0.7963	34.4189
GRMZM2G107815	746	2175	0.9237	67.7459
GRMZM2G123540	746	1899	0.9573	77.592
GRMZM2G065908	746	1576	0.7341	93.4945
AC210013.4	745	1890	0.8561	77.857
GRMZM2G125544	744	2148	0.9255	68.4135
GRMZM2G081188	744	2491	0.9089	58.9933
GRMZM2G385931	744	2698	0.8988	54.4671
GRMZM2G078725	744	2543	0.8742	57.787
GRMZM2G074479	744	1837	0.632	79.9958
GRMZM2G145854	744	2868	0.887	51.2386
GRMZM2G389118	743	4259	0.9401	34.4576
GRMZM2G453794	743	2076	0.9947	70.6911
GRMZM2G011923	742	2390	0.659	61.321
GRMZM2G181002	741	4359	0.902	33.5764
GRMZM2G014444	741	1229	0.8365	119.088
GRMZM2G169182	740	2782	0.8889	52.5385
GRMZM2G073934	740	2084	0.9199	70.1354
GRMZM2G039600	739	4943	0.9189	29.5296
GRMZM2G118344	739	4779	0.9303	30.5429
GRMZM2G132077	738	1099	0.9199	132.636
GRMZM2G077851	738	1775	0.6259	82.1223
GRMZM2G017016	738	2372	0.9743	61.4533
GRMZM2G127756	737	2503	0.9405	58.1581
GRMZM2G702426	737	1015	0.8847	143.418
GRMZM2G138987	737	2710	0.8982	53.7157
GRMZM2G167856	737	1773	0.8398	82.1036
AC155622.2	736	1194	0.9958	121.752
GRMZM2G149802	736	4933	0.9329	29.4693
AC233870.1	736	1944	0.9408	74.7799
GRMZM2G055936	735	866	0.8383	167.638
GRMZM2G001191	735	2619	0.9801	55.4313
GRMZM2G086069	735	1334	0.9303	108.827
GRMZM5G804327	734	1476	0.9654	98.223
GRMZM2G156251	734	2336	0.893	62.0621
GRMZM2G703415	733	4478	0.948	32.3313
GRMZM2G137965	733	2123	0.8832	68.1957
GRMZM2G429169	733	3012	0.8884	48.0676
GRMZM2G336065	733	2199	0.5143	65.8388
AC234158.1	733	4926	0.8719	29.3909
GRMZM2G080746	732	2583	0.9082	55.9745
GRMZM2G105772	732	1699	0.8776	85.0983
GRMZM2G125516	731	1951	0.9539	74.0054
GRMZM2G436092	731	1749	0.9731	82.5526
GRMZM2G460406	731	1630	0.862	88.5795
GRMZM2G003307	731	2079	0.9731	69.449
GRMZM2G468260	731	2615	0.7235	55.214
GRMZM2G023289	731	2474	0.9236	58.3608
GRMZM2G097068	730	3295	0.8886	43.7593
GRMZM2G074300	730	2080	0.601	69.3207
GRMZM2G147849	730	2411	0.8743	59.8038
GRMZM2G412470	730	2783	0.8685	51.8099
GRMZM2G082640	730	1654	0.8392	87.1747
GRMZM2G142072	730	3375	0.9487	42.7221
GRMZM2G004997	729	2388	0.9317	60.2971
GRMZM2G130440	729	1915	0.9687	75.1903
GRMZM2G057935	728	4151	0.9036	34.6403
GRMZM5G883417	728	1567	0.9904	91.7626
GRMZM2G002786	726	1226	0.8605	116.963
GRMZM2G432774	726	2622	0.9619	54.6899
GRMZM2G137528	726	1863	0.8572	76.971
GRMZM2G131912	725	2163	0.7517	66.2041
GRMZM2G462062	725	3996	0.9299	35.8357
GRMZM2G098622	725	2450	0.9098	58.4488
GRMZM2G059580	724	1829	0.8726	78.1859
GRMZM2G088060	724	1427	0.4856	100.212
GRMZM5G888696	724	2422	0.8538	59.0429
GRMZM2G065394	723	2039	0.874	70.0365
GRMZM2G083173	723	2893	0.9419	49.362
GRMZM2G082998	723	1644	0.8248	86.864
GRMZM2G090422	722	1109	0.8106	128.591
GRMZM5G842695	722	2160	0.9171	66.0217
GRMZM2G119071	722	1256	0.6346	113.541
GRMZM2G025074	722	2296	0.9686	62.111
GRMZM2G073535	722	2115	0.6619	67.4264
GRMZM2G044398	722	1915	0.8809	74.4683
GRMZM2G465833	721	2263	0.8144	62.9295
GRMZM2G006673	721	2341	0.9752	60.8327
GRMZM2G022856	721	6115	0.7874	23.2885
GRMZM2G110406	720	3118	0.9407	45.61
GRMZM2G040387	720	2357	0.9351	60.336
GRMZM2G339336	720	1322	0.851	107.573
GRMZM2G071071	720	2619	0.9042	54.3001
GRMZM2G440916	719	3608	0.9748	39.361
GRMZM2G100864	719	3210	0.8545	44.2412
GRMZM2G177928	718	1894	0.8437	74.8769
GRMZM2G047404	718	1703	0.8086	83.2747
GRMZM2G026231	718	2369	0.9553	59.8636
GRMZM2G010960	718	4930	0.899	28.7661
GRMZM2G029107	718	1097	0.8259	129.277
GRMZM2G121262	717	1910	0.8152	74.1462
AC196426.3	717	2235	0.9848	63.3643
GRMZM2G379964	717	2986	0.9267	47.4278
GRMZM2G096070	717	2623	0.7884	53.9913
GRMZM5G815009	717	1074	0.8715	131.862
GRMZM2G057251	717	1429	0.8593	99.1038
GRMZM2G023652	716	1932	0.9244	73.1997
GRMZM2G027932	716	5422	0.8912	26.083
GRMZM2G368448	716	4559	0.8125	31.0204
GRMZM2G085926	716	1548	0.876	91.3577
GRMZM2G012434	715	2600	0.7981	54.317
GRMZM2G097739	715	2957	0.719	47.7593
GRMZM2G058913	714	3138	0.9474	44.9416
GRMZM2G066575	714	4309	0.9689	32.7284
GRMZM2G005980	714	2363	0.9365	59.6812
GRMZM2G118467	714	2645	0.952	53.3182
GRMZM2G087531	714	3913	0.8985	36.0406
GRMZM2G365035	713	2003	0.9621	70.3092
GRMZM2G018950	713	2086	0.8509	67.5116
GRMZM2G133919	713	4190	0.5819	33.6108
GRMZM2G086237	713	3390	0.9159	41.5425
GRMZM2G148744	713	1082	0.7689	130.156
GRMZM2G170567	712	1674	0.9881	84.0094
GRMZM2G092258	712	2187	0.9726	64.3035
GRMZM2G063617	712	1031	0.5887	136.403
GRMZM2G028521	712	3130	0.7754	44.9303
AC190909.3	711	1593	0.7834	88.1571
GRMZM2G069911	711	1248	0.8261	112.527
GRMZM2G057441	711	3681	0.875	38.1511
GRMZM5G804783	711	2116	0.9513	66.3678
GRMZM2G137558	710	2697	0.9292	51.9973
GRMZM2G018126	710	2404	0.9493	58.3347
GRMZM2G142409	710	1533	0.7945	91.4786
GRMZM2G355572	710	2208	0.8419	63.513
GRMZM2G019686	709	853	0.8816	164.173
GRMZM2G070323	708	3627	0.855	38.5557
GRMZM2G145104	708	3715	0.8662	37.6424
GRMZM2G097289	708	3148	0.8529	44.4224
GRMZM2G004699	708	1798	0.8276	77.7762
GRMZM2G126019	708	2373	0.952	58.9303
GRMZM2G174202	708	1846	0.9193	75.7539
GRMZM5G824600	707	1867	0.7434	74.796
GRMZM2G084767	707	3161	0.9582	44.1772
GRMZM2G479744	707	2343	0.9872	59.6006
GRMZM2G006080	707	3172	0.9341	44.024
GRMZM2G019358	707	2353	0.8738	59.3473
GRMZM2G005126	707	3789	0.9454	36.8551
GRMZM2G474769	706	2422	0.9344	57.575
GRMZM2G131793	706	2364	0.9112	58.9876
GRMZM5G886952	706	2461	0.9752	56.6626
GRMZM2G152768	705	3147	0.9009	44.2482
GRMZM2G070045	705	2503	0.7847	55.6329
GRMZM2G143450	704	2775	0.911	50.1087
GRMZM2G074585	704	1320	0.7621	105.342
AC234515.1	704	1335	0.997	104.158
GRMZM2G157679	704	3170	0.8858	43.8649
GRMZM2G056145	704	3554	0.879	39.1254
GRMZM5G830695	704	1942	0.8764	71.6023
GRMZM2G119640	703	2397	0.9241	57.9283
GRMZM2G021621	703	1685	0.7816	82.406
GRMZM2G151195	703	3905	0.9808	35.558
GRMZM2G142019	703	3691	0.9266	37.6196
GRMZM2G033805	703	3211	0.938	43.2433
GRMZM2G330218	702	3956	0.9601	35.0497
GRMZM2G058289	701	2640	0.8303	52.4466
GRMZM2G157384	701	1514	0.7629	91.4525
GRMZM2G021069	700	3028	0.959	45.661
GRMZM2G128491	700	1264	0.9106	109.384
GRMZM2G392649	700	2922	0.7604	47.3174
GRMZM2G070360	699	1282	0.8619	107.694
GRMZM2G015073	699	4496	0.8703	30.7082
AC235541.1	699	3009	0.9651	45.8837
GRMZM2G124353	699	2213	0.8545	62.3877
GRMZM2G416751	698	2312	0.9334	59.6308
GRMZM2G139341	698	2757	0.942	50.006
GRMZM2G177224	698	2085	0.9707	66.123
GRMZM2G105250	698	3408	0.902	40.4538
GRMZM2G155312	698	4336	0.8835	31.7958
GRMZM2G096470	697	2951	0.9573	46.6516
GRMZM2G132303	697	1915	0.7123	71.8898
GRMZM2G479684	697	798	0.7544	172.518
GRMZM2G075628	697	4895	0.9671	28.1244
GRMZM2G101271	697	2042	0.8325	67.4187
GRMZM2G043435	696	3912	0.8602	35.141
GRMZM2G141784	696	1796	0.9521	76.5431
GRMZM2G128319	696	3095	0.8743	44.4173
GRMZM2G036169	696	2734	0.9045	50.2822
GRMZM2G087233	696	1380	0.6942	99.617
GRMZM2G145175	696	1538	0.8309	89.3833
GRMZM2G122999	696	2324	0.9144	59.153
GRMZM2G084812	695	1317	0.9772	104.232
GRMZM5G801875	693	2165	0.9326	63.2235
GRMZM2G124532	693	4147	0.9224	33.0067
GRMZM2G068710	692	2062	0.9476	66.2858
GRMZM2G173536	692	2166	0.8356	63.1031
GRMZM2G164663	692	2593	0.8777	52.7117
GRMZM2G574858	692	3618	0.8472	37.7782
GRMZM2G133764	692	3299	0.7293	41.4312
AC234185.1	691	1908	0.9072	71.5324
GRMZM2G052148	691	2955	0.9526	46.1874
GRMZM2G177812	691	2688	0.9528	50.7753
GRMZM2G077837	691	1564	0.7621	87.2659
GRMZM2G479608	690	1204	0.951	113.195
GRMZM2G139441	690	1586	0.9584	85.9309
GRMZM2G102560	690	2508	0.7803	54.3407
GRMZM2G061928	690	1806	0.6268	75.4631
GRMZM2G096486	689	1265	0.9194	107.58
GRMZM2G146670	689	1421	0.9254	95.7698
GRMZM2G006178	689	2380	0.9282	57.1802
GRMZM2G018103	687	1822	0.8611	74.4752
GRMZM2G127798	687	2594	0.7498	52.3106
GRMZM2G000593	685	2105	0.9843	64.275
GRMZM2G041876	685	3212	0.9399	42.1229
GRMZM2G061419	684	2106	0.9069	64.1506
AC233893.1	684	2349	0.5002	57.5144
GRMZM2G002825	684	1377	0.6231	98.1128
GRMZM2G028929	684	1571	0.7575	85.997
GRMZM2G126253	684	2669	0.9247	50.6187
GRMZM2G140867	683	1385	0.8736	97.4034
GRMZM2G121683	683	2585	0.8348	52.1871
GRMZM2G553379	683	1668	0.8615	80.8775
GRMZM2G101480	682	1195	0.8167	112.725
GRMZM2G106960	682	1415	0.7152	95.1987
GRMZM2G177273	682	1911	0.9372	70.4899
GRMZM2G006707	682	3054	0.9709	44.1081
GRMZM2G136443	682	3379	0.8535	39.8657
GRMZM2G154621	682	3990	0.9013	33.761
GRMZM2G001297	681	2720	0.9419	49.4517
GRMZM2G107872	681	1687	0.9318	79.7325
GRMZM2G168166	681	2350	0.983	57.2378
GRMZM2G367834	681	1929	0.9336	69.7298
GRMZM2G130889	680	2503	0.8406	53.6601
GRMZM2G171179	679	2033	0.7009	65.9684
GRMZM2G081745	679	3745	0.9076	35.8114
GRMZM2G381744	679	2412	0.8876	55.6027
AC205521.3	679	2256	0.945	59.4476
GRMZM2G104649	678	1532	0.8205	87.4126
GRMZM2G092112	678	1915	0.9582	69.9301
GRMZM2G003385	678	2321	0.7574	57.6976
GRMZM2G005493	678	2126	0.9214	62.9897
GRMZM2G125648	677	1517	0.8115	88.1468
GRMZM2G107362	676	1790	0.9078	74.5928
GRMZM2G099352	676	1325	0.7691	100.771
GRMZM2G429241	675	4994	0.9694	26.6968
GRMZM2G700926	674	2329	0.863	57.1602
GRMZM2G074017	674	817	0.8433	162.945
GRMZM2G132991	674	4056	0.8964	32.822
GRMZM2G055992	674	3071	0.875	43.3494
GRMZM2G449123	674	4375	0.7646	30.4288
GRMZM2G340749	674	2587	0.9552	51.4596
GRMZM2G443668	673	3947	0.9311	33.6784
GRMZM2G078022	673	1189	0.8873	111.799
GRMZM2G100511	673	2349	0.8591	56.5894
GRMZM2G303631	673	2712	0.6534	49.015
GRMZM2G044060	673	2812	0.9335	47.2719
GRMZM2G153615	672	2557	0.799	51.9089
GRMZM2G138425	672	3546	0.7008	37.4312
GRMZM2G173852	672	4728	0.8758	28.0734
GRMZM5G824439	672	3392	0.939	39.1306
GRMZM2G094595	672	1636	0.7592	81.1315
GRMZM2G470740	672	2431	0.9046	54.5994
GRMZM2G010011	671	2323	0.9105	57.0528
GRMZM2G030596	671	2785	0.9013	47.5883
GRMZM2G005552	671	1385	0.9805	95.6921
GRMZM2G149428	670	1594	0.7459	83.0214
GRMZM2G105587	670	791	0.8293	167.302
GRMZM2G391000	670	2483	0.9642	53.2968
GRMZM2G012628	670	2254	0.7378	58.7116
GRMZM2G058276	669	2087	0.9027	63.3151
GRMZM2G042231	668	2456	0.9821	53.7219
GRMZM2G081158	667	3951	0.936	33.3443
GRMZM2G048455	667	2038	0.7846	64.6435
GRMZM2G153181	667	1967	0.9232	66.9769
GRMZM5G895313	667	1109	0.7962	118.795
GRMZM2G146616	667	2883	0.8609	45.6967
GRMZM2G045688	667	2394	0.9461	55.0307
GRMZM2G081155	667	2311	0.9546	57.0071
GRMZM2G005947	667	2167	0.7084	60.7953
GRMZM2G174926	666	2781	0.9169	47.3017
GRMZM2G009282	666	3343	0.8809	39.3497
GRMZM2G149717	666	2470	0.8377	53.2575
GRMZM2G102845	665	4127	0.9028	31.8266
GRMZM2G099522	665	1101	0.4332	119.299
GRMZM2G063792	665	2267	0.9215	57.9393
GRMZM2G130800	665	2451	0.8911	53.5897
GRMZM2G121022	665	2416	0.9189	54.3661
GRMZM2G018837	665	2370	0.9148	55.4213
GRMZM2G415327	665	1697	0.5934	77.4004
GRMZM2G121186	664	1430	0.9531	91.7139
GRMZM2G045275	664	3050	0.9564	43.0003
GRMZM2G085254	663	2175	0.8598	60.2085
GRMZM2G124371	663	3671	0.9684	35.6724
GRMZM2G055960	663	3427	0.8226	38.2123
GRMZM2G424053	663	1208	0.7276	108.405
GRMZM2G006493	662	1979	0.9414	66.0717
GRMZM2G000264	662	2152	0.8146	60.7602
GRMZM5G899349	662	2086	0.9444	62.6826
GRMZM2G363460	661	1839	0.9668	70.9942
GRMZM2G042636	661	1900	0.8411	68.7149
GRMZM2G120975	661	3722	0.9447	35.0775
GRMZM2G158153	661	3164	0.5575	41.2637
GRMZM2G301071	660	2989	0.9304	43.6135
GRMZM2G150257	659	1795	0.9827	72.5144
GRMZM2G175510	659	2295	0.8863	56.7161
GRMZM2G087207	658	1978	0.8787	65.7057
GRMZM2G092129	658	2044	0.9687	63.5841
GRMZM2G052875	658	2408	0.9556	53.9725
GRMZM2G149520	658	2607	0.8408	49.8526
GRMZM2G477325	658	1019	0.5034	127.543
GRMZM2G031917	658	3707	0.9202	35.0596
GRMZM2G329177	658	4729	0.8807	27.4827
GRMZM2G011636	657	2107	0.7186	61.5891
GRMZM2G045090	657	4092	0.9655	31.7127
GRMZM2G330302	657	1804	0.9629	71.9337
GRMZM2G027282	657	1776	0.6554	73.0677
GRMZM2G097043	657	2740	0.9799	47.3607
GRMZM2G073750	656	3969	0.9332	32.6457
GRMZM2G143462	656	1857	0.9289	69.7743
GRMZM2G351582	656	2096	0.9179	61.8181
GRMZM2G104373	656	1764	0.8764	73.4528
GRMZM2G446872	655	6086	0.8891	21.2575
GRMZM2G087712	655	3391	0.9183	38.152
GRMZM2G177974	655	2364	0.9759	54.7264
GRMZM2G018275	654	1393	0.9612	92.7321
GRMZM2G432566	654	3283	0.9095	39.3469
GRMZM2G033894	654	1826	0.948	70.7425
GRMZM2G156800	654	3512	0.7722	36.7813
GRMZM2G003043	654	4386	0.9298	29.4518
GRMZM2G358050	653	3507	0.8674	36.7774
GRMZM2G074898	653	1088	0.6949	118.546
GRMZM2G066578	652	2489	0.9	51.74
GRMZM2G158359	652	3387	0.8692	38.0221
GRMZM2G075624	652	960	0.7115	134.147
GRMZM2G137930	651	1755	0.4125	73.2668
GRMZM2G102347	650	1559	0.9339	82.3513
GRMZM2G015090	650	2037	0.8645	63.0269
GRMZM2G026442	650	4043	0.8709	31.7551
GRMZM2G174644	649	2003	0.9376	63.9981
GRMZM2G098999	649	2661	0.867	48.1729
GRMZM2G168706	648	2351	0.9149	54.4409
GRMZM2G104918	647	1924	0.54	66.4206
GRMZM5G866947	647	917	0.9182	139.36
GRMZM2G008490	647	3415	0.8512	37.4211
GRMZM2G114675	647	2222	0.8861	57.5127
GRMZM5G863656	647	422	0.7796	302.827
GRMZM2G069410	647	1621	0.9334	78.836
GRMZM2G117346	647	4484	0.8918	28.4998
GRMZM2G109509	647	4235	0.8189	30.1755
GRMZM2G018197	646	1835	0.7777	69.5344
GRMZM2G352431	646	6054	0.9181	21.0763
GRMZM2G175272	646	1271	0.9001	100.39
GRMZM2G001514	646	2114	0.6632	60.3574
GRMZM2G037177	645	1133	0.9206	112.443
GRMZM2G022269	645	2349	0.8203	54.235
GRMZM2G083836	645	2505	0.6878	50.8575
GRMZM2G068277	645	1524	0.8471	83.5946
GRMZM2G358311	645	3898	0.9423	32.6829
GRMZM2G080912	645	2771	0.6153	45.9755
GRMZM2G353548	645	3342	0.8875	38.1203
GRMZM2G048012	645	2479	0.9508	51.3909
GRMZM2G159720	645	3098	0.9755	41.1227
GRMZM2G053803	645	2695	0.82	47.272
GRMZM2G160702	645	3207	0.9417	39.725
GRMZM2G109624	643	2069	0.9203	61.3838
GRMZM2G030125	643	2256	0.9224	56.2957
GRMZM2G447455	643	3400	0.7938	37.3538
GRMZM2G143625	643	1525	0.9869	83.2807
GRMZM2G366150	643	2473	0.9507	51.3559
GRMZM2G464754	642	7329	0.8376	17.3019
GRMZM2G323622	642	2486	0.8616	51.0079
GRMZM2G145951	642	1450	0.8986	87.4521
GRMZM2G041328	641	4228	0.7566	29.9451
GRMZM2G114793	641	2352	0.8397	53.83
GRMZM2G032505	641	1641	0.9001	77.153
GRMZM2G070807	641	2790	0.8047	45.3792
GRMZM2G000531	640	1607	0.8874	78.6624
GRMZM2G145300	640	3926	0.9294	32.1983
GRMZM2G140590	640	2509	0.9247	50.3828
GRMZM2G120304	639	1401	0.9322	90.0878
GRMZM2G048494	639	2411	0.9598	52.3488
GRMZM2G040762	639	4670	0.9518	27.0263
GRMZM2G041765	639	1811	0.9023	69.6924
GRMZM2G047995	639	2651	0.6839	47.6096
GRMZM2G147726	638	1998	0.3794	63.0708
GRMZM2G063864	638	1357	0.9086	92.8633
GRMZM2G173341	638	2057	0.6631	61.2618
GRMZM2G104430	638	1920	0.9234	65.6331
GRMZM2G047855	638	1711	0.8843	73.6502
GRMZM2G107473	638	1440	0.9451	87.5108
GRMZM2G117900	637	1928	0.9108	65.2583
GRMZM2G100639	637	2838	0.8136	44.3333
GRMZM2G456568	636	3377	0.7397	37.1988
GRMZM2G311051	636	2114	0.9622	59.4231
GRMZM2G067511	636	1050	0.8457	119.639
GRMZM2G327394	635	3646	0.9682	34.4002
GRMZM5G845755	635	2040	0.7642	61.4818
GRMZM5G808624	635	2504	0.9437	50.089
GRMZM2G359333	635	3536	0.8778	35.4703
GRMZM2G156643	635	2563	0.8213	48.936
GRMZM2G175076	634	1315	0.8251	95.2285
GRMZM2G082390	634	1119	0.6854	111.908
GRMZM2G079908	634	866	0.7102	144.602
GRMZM2G093359	634	1828	0.8939	68.5041
GRMZM2G134628	633	2629	0.865	47.5572
GRMZM2G362557	633	2449	0.7632	51.0526
GRMZM2G109448	632	1679	0.427	74.3481
GRMZM2G126682	632	1880	0.8069	66.3992
GRMZM2G388892	632	3822	0.9383	32.661
GRMZM2G024310	632	1157	0.7277	107.891
GRMZM2G099454	632	1227	0.8672	101.736
GRMZM2G407249	632	1720	0.3715	72.5758
GRMZM2G366698	632	3236	0.8922	38.5755
GRMZM2G119426	631	2554	0.7377	48.7991
GRMZM2G038050	631	4784	0.899	26.052
GRMZM2G331032	631	2011	0.9632	61.9756
GRMZM2G152328	631	1989	0.5907	62.6611
GRMZM2G146358	630	2350	0.5047	52.9512
GRMZM2G150648	630	2178	0.8375	57.1329
GRMZM2G115049	630	1316	0.9301	94.5558
GRMZM2G307252	630	1979	0.8747	62.8779
GRMZM2G149556	629	993	0.6324	125.114
GRMZM2G006942	629	2742	0.9311	45.3092
GRMZM2G115000	629	3123	0.959	39.7816
GRMZM2G024484	629	2024	0.9239	61.3823
GRMZM2G153594	629	3378	0.9446	36.7785
GRMZM2G175867	629	2133	0.9489	58.2456
GRMZM2G028700	628	4075	0.8692	30.4393
GRMZM2G136665	628	4244	0.9319	29.2272
GRMZM2G396846	628	1830	0.8923	67.7816
GRMZM5G893913	628	2871	0.9073	43.2046
GRMZM2G070273	628	3872	0.9042	32.0352
GRMZM2G013750	628	1815	0.7504	68.3418
GRMZM2G147791	628	642	0.6215	193.209
GRMZM2G020912	627	3751	0.924	33.0159
GRMZM5G844195	627	2934	0.9451	42.2096
GRMZM2G037923	627	2890	0.7526	42.8522
GRMZM2G168913	627	1708	0.9725	72.5075
GRMZM2G010095	627	3490	0.9218	35.4851
GRMZM2G423337	627	2064	0.8702	60.0014
GRMZM2G028096	627	1981	0.9258	62.5153
GRMZM2G063369	626	3042	0.9004	40.6461
GRMZM2G322024	626	5538	0.92	22.3267
GRMZM2G151536	625	2469	0.9081	49.9991
GRMZM2G017089	625	2159	0.9662	57.1782
GRMZM2G136296	625	4026	0.7951	30.6626
GRMZM2G328988	625	5489	0.8165	22.49
GRMZM2G148913	625	3346	0.8757	36.8941
GRMZM5G838579	625	896	0.9955	137.777
GRMZM2G174730	624	1536	0.862	80.2411
GRMZM2G095299	624	1254	0.8844	98.2857
GRMZM2G140726	624	2879	0.8763	42.8101
GRMZM2G103812	624	2097	0.7949	58.7746
GRMZM2G034276	624	3335	0.866	36.9566
GRMZM2G156756	623	3573	0.9547	34.4396
GRMZM5G877500	623	1566	0.963	78.5778
GRMZM2G465333	622	915	0.9388	134.268
GRMZM2G139822	622	1876	0.9318	65.4879
GRMZM2G060800	622	2425	0.7744	50.662
GRMZM2G139892	622	3490	0.8633	35.2021
GRMZM5G835235	622	2098	0.6864	58.5583
GRMZM5G885644	621	2853	0.9467	42.9925
GRMZM2G101463	621	2074	0.8848	59.1407
GRMZM2G160428	621	2823	0.9249	43.4494
GRMZM2G104375	621	1732	0.9873	70.8185
GRMZM2G056732	621	1782	0.8199	68.8315
GRMZM2G041980	621	1505	0.8445	81.5002
GRMZM2G101958	620	1057	0.667	115.856
GRMZM2G083475	620	3800	0.8747	32.2264
GRMZM2G464401	620	2099	0.6865	58.3422
GRMZM2G060824	620	4033	0.8535	30.3645
GRMZM2G392798	620	3451	0.9542	35.4854
GRMZM2G162525	620	3635	0.4663	33.6892
GRMZM2G008058	620	2029	0.7802	60.355
GRMZM2G436835	620	2336	0.7954	52.423
GRMZM2G159388	619	1347	0.8998	90.7667
AC185226.4	619	2790	0.9462	43.8218
GRMZM2G465764	619	5649	0.6468	21.6432
GRMZM2G046005	619	2290	0.7572	53.3898
GRMZM2G103345	618	2775	0.751	43.9875
GRMZM2G092296	618	2098	0.5272	58.1817
GRMZM2G002948	618	1170	0.965	104.329
GRMZM2G052416	618	2038	0.9249	59.8946
GRMZM2G004534	618	2241	0.9197	54.4691
GRMZM2G121452	617	1546	0.8144	78.8277
GRMZM5G809587	617	2208	0.904	55.1937
GRMZM2G139407	617	1965	0.9313	62.0192
GRMZM5G850019	617	1276	0.9781	95.5076
GRMZM2G320689	616	4512	0.6157	26.9659
GRMZM2G431243	616	3165	0.8395	38.4424
GRMZM2G016817	616	1224	0.9069	99.4037
GRMZM2G048472	615	1975	0.9387	61.5051
GRMZM2G173354	615	1713	0.9247	70.9122
GRMZM2G021742	615	1678	0.854	72.3913
GRMZM2G073931	615	2506	0.818	48.4727
GRMZM2G077253	615	2498	0.9163	48.628
GRMZM2G100403	614	1516	0.9334	79.9968
GRMZM2G337659	614	4398	0.8856	27.5751
GRMZM2G413652	614	2186	0.9177	55.4781
GRMZM2G011219	614	2940	0.9044	41.25
GRMZM2G120918	613	765	0.4222	158.271
GRMZM2G058345	613	2660	0.8598	45.5179
GRMZM2G001457	613	2993	0.9599	40.4536
GRMZM2G134917	613	1791	0.7945	67.6033
GRMZM2G102858	612	2338	0.9542	51.7023
GRMZM2G161087	612	2689	0.9256	44.9535
GRMZM2G130079	612	886	0.6366	136.433
GRMZM2G176576	611	2341	0.8629	51.5517
GRMZM2G379929	611	1764	0.9501	68.4142
GRMZM2G129451	611	2526	0.8876	47.7762
GRMZM2G374065	611	2874	0.9478	41.9911
GRMZM2G031053	611	3271	0.7805	36.8947
GRMZM2G145827	611	2423	0.9026	49.8071
GRMZM2G179703	610	2547	0.8108	47.3047
GRMZM2G075942	610	2144	0.8755	56.1964
GRMZM2G152688	610	1636	0.915	73.6461
GRMZM2G049296	610	1514	0.8554	79.5806
GRMZM2G121776	610	2385	0.943	50.5178
GRMZM2G466139	610	4497	0.9344	26.7923
GRMZM2G180732	609	2813	0.9101	42.7613
GRMZM2G005456	609	1668	0.9976	72.1148
GRMZM2G062953	609	2619	0.9603	45.9288
GRMZM2G085086	608	1010	0.8851	118.901
GRMZM2G025832	608	1891	0.9376	63.5061
GRMZM2G044469	608	1566	0.9189	76.6858
GRMZM2G061745	608	1786	0.8119	67.2396
GRMZM2G009593	608	3756	0.8802	31.9728
GRMZM2G132936	607	3399	0.9	35.2729
GRMZM5G815358	607	1920	0.8521	62.444
GRMZM5G883043	607	2109	0.9621	56.848
GRMZM2G090904	607	1766	0.9179	67.8893
GRMZM2G022915	607	2373	0.9039	50.5236
GRMZM2G153274	607	3797	0.4554	31.5756
GRMZM2G163233	607	2112	0.7973	56.7673
GRMZM2G013100	607	3432	0.9615	34.9337
GRMZM2G558539	606	1582	0.8786	75.6605
GRMZM2G121790	605	1955	0.8762	61.124
GRMZM2G152663	605	2688	0.9234	44.4559
GRMZM2G126435	605	1989	0.9492	60.0792
GRMZM2G157621	605	3654	0.8719	32.7032
GRMZM2G032315	605	777	0.4903	153.793
GRMZM2G128865	605	1498	0.9259	79.7713
GRMZM2G479423	605	1808	0.4381	66.0937
GRMZM2G006297	604	3023	0.9808	39.4641
AC205419.3	604	3099	0.9845	38.4963
GRMZM2G398506	604	2237	0.9633	53.3303
GRMZM5G822591	604	1694	0.7332	70.425
GRMZM2G155321	604	2270	0.8551	52.555
GRMZM2G412899	603	2176	0.9871	54.7346
GRMZM2G114954	603	1012	0.0484	117.69
GRMZM2G432128	603	2347	0.6745	50.7467
GRMZM2G013794	602	3720	0.9054	31.9637
GRMZM2G005082	602	2066	0.9439	57.5532
GRMZM5G862565	601	5008	0.9145	23.7036
GRMZM2G087719	601	2372	0.6033	50.0453
GRMZM2G036502	601	1425	0.9832	83.3034
GRMZM2G007871	601	2375	0.9722	49.9821
GRMZM2G056357	601	2880	0.8972	41.2178
GRMZM2G033135	601	7199	0.8443	16.4894
GRMZM2G066867	600	2056	0.9168	57.641
GRMZM2G073275	600	891	0.8058	133.008
GRMZM2G161560	600	1070	0.8935	110.757
GRMZM2G064732	600	1725	0.9449	68.7014
GRMZM2G042582	600	1581	0.7306	74.9588
GRMZM2G157329	600	2261	0.8594	52.4148
GRMZM2G161337	600	2722	0.8505	43.5378
GRMZM2G067601	599	1465	0.7863	80.7593
GRMZM2G103721	599	3079	0.9253	38.4256
GRMZM2G473310	599	2946	0.9141	40.1603
GRMZM5G848857	598	1852	0.9066	63.7769
GRMZM2G047727	598	1157	0.6534	102.087
GRMZM2G152775	598	1976	0.5891	59.7747
GRMZM2G034572	597	3749	0.92	31.453
GRMZM2G152111	597	1836	0.8954	64.2251
GRMZM2G086904	597	910	0.5187	129.579
GRMZM2G424582	596	5382	0.8508	21.8729
GRMZM2G174738	596	1915	0.9295	61.4725
GRMZM2G477741	596	1900	0.8747	61.9578
GRMZM5G821637	596	2671	0.5605	44.0733
GRMZM2G098557	596	4369	0.8482	26.9443
GRMZM2G060253	596	2119	0.8891	55.5544
GRMZM2G063517	596	3080	0.9588	38.2207
GRMZM5G830874	595	3098	0.9277	37.9349
GRMZM2G021194	594	2978	0.8502	39.3972
GRMZM2G000039	594	3079	0.9363	38.1048
GRMZM2G169648	594	1987	0.9094	59.0462
GRMZM2G102625	594	3175	0.9742	36.9527
GRMZM2G010953	594	1373	0.8988	85.4514
GRMZM2G180704	593	2062	0.9675	56.8027
GRMZM5G823855	592	991	0.9294	117.992
GRMZM2G152549	592	2681	0.8941	43.6142
GRMZM2G177720	592	1069	0.5884	109.382
GRMZM2G025488	592	2399	0.9362	48.741
AC208327.4	592	2047	0.7811	57.1225
GRMZM2G077757	591	2464	0.9456	47.3751
GRMZM2G095326	591	5103	0.9571	22.8752
GRMZM2G155543	591	1743	0.6925	66.972
GRMZM2G173387	591	3227	0.8317	36.1736
GRMZM2G130746	591	1111	0.757	105.07
AC190609.3	590	2085	0.6676	55.892
GRMZM2G084521	590	1433	0.6162	81.3222
GRMZM2G422651	590	2301	0.9322	50.6452
GRMZM2G163514	590	743	0.9758	156.843
GRMZM2G111304	589	2774	0.9174	41.9384
GRMZM2G005310	589	3236	0.9175	35.9509
GRMZM5G864735	589	694	0.8847	167.633
GRMZM2G480809	589	4529	0.8854	25.6872
GRMZM2G141517	589	3722	0.8815	31.2566
GRMZM5G813584	589	880	0.9614	132.201
GRMZM2G040164	589	1350	0.8304	86.1757
GRMZM2G124377	589	3363	0.9001	34.5933
GRMZM2G312365	588	5329	0.9358	21.7939
GRMZM2G028156	588	2843	0.9128	40.8511
GRMZM2G176677	588	2495	0.8325	46.549
GRMZM2G172523	587	2595	0.9025	44.6791
GRMZM2G076827	587	1826	0.8182	63.4952
GRMZM2G002874	587	1603	0.8721	72.3282
GRMZM2G121303	587	1556	0.8233	74.513
GRMZM2G074790	586	2420	0.8029	47.8284
GRMZM2G326328	586	4639	0.9131	24.9503
AC231180.2	586	3297	0.28	35.1061
GRMZM2G119761	586	1962	0.8807	58.9932
GRMZM2G139038	586	3136	0.9283	36.9084
[truncated: 21,860 more rows]

## Sheet: 2B
	Genes expressed in MS
GeneID	Uniq_reads_num	Length	Coverage	RPKM
GRMZM2G168651	43520	1607	0.8519	7000.29
GRMZM2G136910	43383	1250	0.7152	8971.25
GRMZM2G402631	21790	978	0.9836	5759.19
GRMZM2G006937	19810	2794	0.8873	1832.74
GRMZM2G164229	17482	1778	0.5011	2541.57
GRMZM2G453805	16527	1355	0.9122	3152.81
GRMZM2G153292	16166	1889	0.9513	2212.15
GRMZM2G080603	13221	1547	0.6031	2209.11
GRMZM2G074604	13106	2783	0.8523	1217.31
GRMZM2G010868	12150	1704	0.4607	1843.1
GRMZM2G445602	12005	2435	0.97	1274.4
GRMZM2G101958	11810	1057	0.6973	2888.14
GRMZM2G092474	10853	1133	0.8764	2476.07
GRMZM2G112968	10633	1384	0.8829	1985.93
GRMZM2G029912	10388	2452	0.9731	1095.1
GRMZM2G079348	10151	2788	0.5312	941.151
GRMZM2G308860	9866	2366	0.997	1077.88
GRMZM2G009479	9647	3118	0.9606	799.76
GRMZM2G117989	9468	1320	0.6985	1854.08
GRMZM2G051943	9373	1246	0.9992	1944.48
GRMZM2G024668	9113	2550	0.9592	923.771
GRMZM2G005633	8614	1591	0.7806	1399.52
GRMZM2G056252	7494	1961	0.9291	987.823
GRMZM2G125032	7354	1279	0.9828	1486.27
GRMZM2G340251	7273	2648	0.8573	709.968
GRMZM2G419891	6894	1976	0.9833	901.836
GRMZM2G063162	6733	4493	0.6989	387.361
GRMZM2G310431	6095	2581	0.8225	610.42
GRMZM2G039639	5987	1184	0.8547	1307.08
GRMZM2G107839	5741	1094	0.5631	1356.48
GRMZM2G154397	5731	2526	0.7945	586.463
GRMZM2G177812	5681	2688	0.9859	546.31
GRMZM2G122276	5541	761	0.9855	1882.12
GRMZM2G080466	5493	1557	0.6198	911.936
GRMZM2G053206	5451	1372	0.9257	1026.99
GRMZM2G159397	5427	1730	0.8936	810.881
GRMZM2G409726	5257	2382	0.8039	570.479
GRMZM2G031790	5245	1935	0.9416	700.661
GRMZM2G450233	5022	2213	0.7063	586.595
GRMZM2G159285	4733	1503	0.9541	813.993
GRMZM2G083526	4542	2569	0.9696	457.011
GRMZM2G123029	4541	2021	0.9243	580.802
GRMZM2G069651	4417	2688	0.952	424.758
GRMZM2G117198	4328	1633	0.94	685.085
GRMZM2G116646	4292	1591	0.9679	697.321
GRMZM2G467893	4282	2424	0.894	456.622
GRMZM2G139874	4204	2010	0.9274	540.642
GRMZM2G457003	4201	3018	0.8999	359.813
GRMZM2G165901	4115	1256	0.6744	846.883
GRMZM2G098298	4103	1571	0.9217	675.101
GRMZM2G104400	4070	2626	0.9372	400.63
GRMZM2G012631	4040	2668	0.9831	391.416
GRMZM2G104325	3926	3579	0.8287	283.551
GRMZM2G700208	3919	1173	0.9991	863.616
GRMZM2G327595	3916	2335	0.7555	433.51
AC207722.2	3858	1166	0.8774	855.277
GRMZM2G083725	3841	1424	0.7416	697.232
AC209208.3	3818	2967	0.5366	332.63
GRMZM2G067985	3729	2685	0.5609	358.997
GRMZM2G416388	3666	1788	0.8473	529.991
GRMZM2G096585	3598	2301	0.8909	404.192
GRMZM2G061969	3575	3144	0.952	293.925
GRMZM2G432128	3541	2347	0.7422	389.992
GRMZM2G103342	3540	2120	0.8995	431.629
GRMZM2G166159	3526	2989	0.9057	304.93
GRMZM2G036217	3486	2339	0.9316	385.248
GRMZM2G158394	3484	1432	0.7402	628.895
GRMZM2G343543	3468	1886	0.8871	475.314
GRMZM2G029048	3467	2610	0.9241	343.365
GRMZM2G144387	3439	1127	0.8279	788.772
GRMZM2G014695	3411	2100	0.7562	419.861
AC215690.3	3382	1179	0.9966	741.486
AC195340.3	3366	3444	0.1251	252.635
GRMZM2G056039	3341	2498	0.8979	345.722
GRMZM2G330019	3333	2766	0.9154	311.477
GRMZM2G006894	3322	3409	0.9803	251.893
GRMZM2G092447	3316	3582	0.8364	239.294
GRMZM2G374971	3259	1319	0.6793	638.679
GRMZM2G091481	3221	2242	0.8426	371.363
GRMZM5G834758	3176	1571	0.9128	522.574
GRMZM2G156632	3156	619	0.8578	1317.92
GRMZM2G467799	3047	8676	0.959	90.7813
GRMZM2G097059	3031	1186	0.8803	660.609
GRMZM2G137329	3027	724	0.9834	1080.73
GRMZM2G020801	2992	3273	0.9569	236.297
GRMZM2G112165	2919	2919	0.8068	258.49
GRMZM2G123558	2911	1275	0.9804	590.167
GRMZM2G166281	2907	2328	0.5649	322.779
GRMZM2G180625	2906	2060	0.5553	364.646
GRMZM2G153541	2903	1961	0.8251	382.66
GRMZM2G105996	2903	1162	0.9398	645.779
GRMZM2G116273	2900	1337	0.7053	560.673
GRMZM2G091155	2885	1520	0.9711	490.62
GRMZM2G107101	2869	4571	0.946	162.242
GRMZM2G058675	2861	2342	0.924	315.772
GRMZM2G080530	2860	2562	0.9438	288.556
GRMZM2G102829	2857	2673	0.8911	276.283
GRMZM2G046804	2843	1963	0.7769	374.369
GRMZM2G331368	2805	11519	0.9689	62.945
GRMZM2G067546	2779	2731	0.9795	263.033
GRMZM2G141473	2773	4649	0.9325	154.182
GRMZM2G129034	2701	1616	0.8243	432.043
GRMZM2G102471	2670	1291	0.7777	534.599
GRMZM2G028521	2667	3130	0.8112	220.253
GRMZM2G010356	2666	1921	0.9771	358.737
GRMZM2G032003	2625	2560	0.8168	265.053
GRMZM2G700188	2624	2274	0.7427	298.275
GRMZM2G077233	2605	3870	0.6168	173.996
GRMZM2G099860	2595	4077	0.8808	164.528
GRMZM2G090338	2593	2420	0.9504	276.969
GRMZM2G073465	2587	2077	0.8657	321.961
GRMZM2G070863	2569	2500	0.8372	265.624
GRMZM2G142409	2554	1533	0.8402	430.648
GRMZM2G087150	2550	1805	0.7867	365.179
GRMZM2G360681	2542	3168	0.9814	207.412
GRMZM2G071154	2528	2103	0.9006	310.728
GRMZM2G477872	2527	4606	0.8999	141.816
GRMZM2G169182	2524	2782	0.9378	234.518
GRMZM2G123896	2524	1622	0.7109	402.237
GRMZM2G326111	2501	1210	0.8397	534.283
GRMZM2G152466	2498	2297	0.7479	281.109
GRMZM5G800586	2473	1700	0.9488	376.026
GRMZM2G147014	2448	1404	0.792	450.7
GRMZM2G157564	2424	2808	0.9765	223.141
GRMZM2G009335	2392	1914	0.9519	323.045
GRMZM2G122479	2384	2473	0.9418	249.187
GRMZM5G814700	2373	1810	0.926	338.893
GRMZM2G075255	2357	2491	0.9125	244.585
GRMZM2G055320	2341	2240	0.9009	270.145
GRMZM2G364069	2332	2146	0.473	280.894
GRMZM2G358059	2294	1861	0.8963	318.633
GRMZM5G899851	2291	2751	0.9764	215.267
GRMZM2G124353	2239	2213	0.854	261.527
GRMZM2G060583	2223	4213	0.9836	136.393
GRMZM2G061135	2221	1715	0.8647	334.755
GRMZM2G056068	2215	2636	0.7147	217.206
GRMZM2G354604	2200	1322	0.8873	430.164
GRMZM2G023232	2189	3133	0.9547	180.605
GRMZM2G009136	2169	1864	0.8267	300.786
GRMZM2G174807	2169	1388	0.9013	403.937
GRMZM2G406830	2157	3654	0.9576	152.59
GRMZM2G053458	2144	1443	0.8503	384.062
GRMZM2G415529	2140	5346	0.8429	103.473
GRMZM2G127087	2140	2017	0.9291	274.253
GRMZM2G131912	2125	2163	0.8465	253.949
GRMZM2G064302	2105	2022	0.8991	269.1
GRMZM2G011588	2102	2952	0.9685	184.06
GRMZM2G312110	2099	8706	0.9748	62.3214
GRMZM2G042313	2096	2526	0.9972	214.487
GRMZM2G127072	2084	1505	0.8618	357.935
GRMZM2G113696	2080	1520	0.5678	353.723
GRMZM2G153977	2077	1232	0.7849	435.782
GRMZM2G162486	2074	1383	0.8568	387.641
GRMZM2G085078	2064	7057	0.896	75.6019
GRMZM2G093405	2057	2002	0.8551	265.591
GRMZM2G122937	2034	1333	0.7907	394.425
GRMZM5G858094	2028	7464	0.9721	70.2327
GRMZM2G022206	2024	1025	0.8039	510.423
GRMZM2G134668	2021	2362	0.9153	221.172
GRMZM2G108474	2020	1471	0.811	354.962
GRMZM2G060800	2011	2425	0.8656	214.36
GRMZM2G003762	1998	1733	0.7282	298.016
GRMZM2G013002	1991	1857	0.8185	277.142
AC203173.3	1991	2532	0.9874	203.259
GRMZM2G079616	1990	1594	0.8908	322.707
GRMZM2G164974	1990	2214	0.9648	232.337
GRMZM2G129354	1988	2163	0.9552	237.576
GRMZM2G154007	1977	1856	0.9682	275.342
GRMZM2G044947	1973	1925	0.8945	264.935
GRMZM2G108849	1973	1790	0.8726	284.916
GRMZM5G855672	1971	1185	0.9679	429.944
GRMZM2G015542	1968	2915	0.6758	174.514
GRMZM2G057646	1965	3127	0.9603	162.434
GRMZM2G310115	1963	3289	0.4579	154.276
GRMZM2G001645	1961	2554	0.9338	198.472
AC234203.1	1952	4491	0.9655	112.352
GRMZM2G139786	1933	850	0.8682	587.836
GRMZM2G086489	1928	2700	0.88	184.581
GRMZM2G161335	1920	1811	0.984	274.048
GRMZM2G122871	1919	1909	0.835	259.844
GRMZM2G084881	1908	1995	0.8787	247.217
GRMZM2G149751	1906	3753	0.5548	131.277
GRMZM2G389233	1906	3609	0.8966	136.515
GRMZM2G128056	1905	2032	0.9503	242.334
GRMZM2G116140	1905	1756	0.676	280.423
GRMZM5G836222	1903	1247	0.9294	394.471
GRMZM2G153393	1899	2703	0.9012	181.603
GRMZM2G340656	1889	2894	0.8652	168.724
GRMZM2G157727	1887	4059	0.9325	120.17
GRMZM2G023786	1885	1433	0.8765	340.023
GRMZM2G108348	1877	1542	0.7017	314.647
GRMZM2G103812	1869	2097	0.856	230.385
GRMZM5G831102	1841	1647	0.9247	288.937
AC205502.4	1838	1614	0.8476	294.364
GRMZM2G112456	1824	2726	0.8734	172.959
GRMZM2G021299	1814	11999	0.9493	39.0783
GRMZM2G176647	1812	3659	0.9421	128.009
GRMZM2G156748	1804	2480	0.996	188.03
GRMZM2G023418	1800	4506	0.9862	103.258
GRMZM5G833699	1800	2848	0.8539	163.371
GRMZM2G106263	1796	2270	0.8044	204.514
GRMZM2G115750	1786	1642	0.9135	281.159
GRMZM2G181151	1785	2279	0.8455	202.459
GRMZM2G070659	1780	1836	0.6732	250.605
GRMZM2G058910	1779	3761	0.7626	122.269
GRMZM2G051879	1776	1155	0.6727	397.47
GRMZM5G800112	1774	903	0.9546	507.819
GRMZM2G476009	1774	1088	0.8603	421.471
GRMZM2G084819	1757	14668	0.9648	30.9631
GRMZM2G029219	1751	2179	0.9523	207.717
GRMZM2G479885	1747	1558	0.9345	289.847
GRMZM2G017110	1747	2100	0.99	215.039
GRMZM2G326643	1739	6328	0.9785	71.0357
GRMZM2G382914	1721	1985	0.7804	224.111
GRMZM2G088212	1720	2178	0.9513	204.133
GRMZM2G119886	1716	2003	0.8602	221.452
GRMZM2G325575	1715	1867	0.6883	237.445
GRMZM2G051782	1715	1757	0.934	252.311
GRMZM2G132903	1706	2845	0.9139	155.003
GRMZM2G041328	1704	4228	0.7091	104.178
GRMZM2G099454	1693	1227	0.9405	356.661
GRMZM2G001297	1692	2720	0.9757	160.796
GRMZM2G411536	1687	11470	0.9157	38.0185
GRMZM2G012391	1684	2284	0.9059	190.585
GRMZM2G377341	1680	7198	0.9583	60.331
GRMZM2G328500	1680	2543	0.7157	170.768
GRMZM2G375116	1679	3535	0.9502	122.773
GRMZM5G835323	1678	1250	0.6752	346.997
GRMZM2G045070	1674	2915	0.8755	148.443
GRMZM5G848768	1662	1977	0.9656	217.304
GRMZM2G142802	1662	1233	0.9505	348.427
GRMZM2G061681	1659	3471	0.9741	123.548
GRMZM2G084181	1655	5156	0.9955	82.9714
GRMZM2G088501	1654	1511	0.8934	282.953
GRMZM2G134256	1651	1922	0.8887	222.043
GRMZM2G110504	1648	899	0.9155	473.85
GRMZM2G082271	1642	4012	0.8258	105.793
GRMZM2G171518	1641	2086	0.8888	203.347
GRMZM2G145088	1638	4169	0.9787	101.561
AC196475.3	1637	1902	0.9395	222.475
GRMZM2G057823	1636	1697	0.8845	249.198
GRMZM2G305115	1636	2131	0.8278	198.446
GRMZM2G141931	1635	2842	0.8856	148.709
GRMZM2G072205	1626	2375	0.9158	176.97
GRMZM5G864319	1611	2641	0.9228	157.678
GRMZM2G155348	1609	2422	0.8993	171.722
GRMZM2G004511	1601	1443	0.8281	286.793
GRMZM2G059836	1598	831	0.9471	497.072
GRMZM2G132759	1598	1284	0.7928	321.703
GRMZM2G180951	1589	3220	0.995	127.559
GRMZM2G022180	1585	2427	0.7079	168.812
GRMZM2G033644	1584	2236	0.8663	183.116
GRMZM2G110735	1575	2808	0.813	144.986
GRMZM2G140667	1573	1312	0.7134	309.912
GRMZM2G015605	1565	803	0.6102	503.781
GRMZM2G034985	1564	3349	0.8585	120.716
GRMZM2G124317	1557	1218	0.7061	330.434
GRMZM2G098346	1552	1685	0.9964	238.087
GRMZM2G401664	1551	1827	0.9535	219.44
GRMZM2G165917	1541	2604	0.8084	152.97
GRMZM2G360517	1537	5913	0.9231	67.1907
GRMZM5G883741	1537	2083	0.9899	190.734
GRMZM2G178398	1532	3613	0.9646	109.606
GRMZM2G077197	1530	2459	0.9512	160.833
GRMZM2G014240	1528	2894	0.9067	136.48
GRMZM2G155532	1521	2767	0.9559	142.09
GRMZM2G117971	1519	782	0.546	502.105
GRMZM2G034764	1508	1893	0.8827	205.918
GRMZM2G030422	1499	4236	0.9013	91.4722
GRMZM2G058032	1498	1436	0.8997	269.65
GRMZM2G057576	1496	5731	0.8977	67.4752
GRMZM2G352129	1495	2698	0.8981	143.233
GRMZM2G553687	1492	5724	0.975	67.3771
GRMZM2G121333	1491	2140	0.9701	180.097
GRMZM2G035741	1490	1780	0.759	216.376
GRMZM2G060702	1490	2272	0.3746	169.52
GRMZM2G114793	1487	2352	0.8452	163.424
GRMZM2G108285	1487	1005	0.9443	382.462
GRMZM2G176595	1475	1218	0.8604	313.031
GRMZM2G163849	1475	7070	0.9239	53.9282
GRMZM2G004382	1471	2076	0.9133	183.159
GRMZM2G048324	1470	2279	0.8864	166.731
GRMZM2G152258	1470	1512	0.8519	251.309
GRMZM2G053299	1469	2009	0.899	189.01
GRMZM2G434173	1467	2497	0.7861	151.864
GRMZM2G012434	1465	2600	0.845	145.649
GRMZM2G181192	1465	1402	0.9736	270.105
AC208221.3	1459	744	0.6035	506.904
GRMZM2G124175	1458	1817	0.7144	207.418
GRMZM2G026991	1457	6849	0.9832	54.989
AC231745.1	1454	2796	0.5054	134.422
GRMZM2G056772	1453	808	0.9579	464.834
GRMZM2G081155	1453	2311	0.9732	162.521
GRMZM2G079682	1449	2067	0.897	181.205
GRMZM2G144030	1439	1617	0.4731	230.035
GRMZM2G002786	1435	1226	0.9315	302.555
GRMZM2G023387	1431	1417	0.8574	261.044
GRMZM2G003963	1430	1730	0.904	213.665
GRMZM5G854613	1429	2045	0.9971	180.627
GRMZM2G105571	1427	1735	0.951	212.602
AC209784.3	1420	2049	0.0239	179.139
GRMZM2G051270	1418	1993	0.6864	183.913
GRMZM2G032163	1416	2871	0.9892	127.489
GRMZM2G151041	1412	3889	0.9187	93.8512
GRMZM2G415359	1412	1693	0.7933	215.586
GRMZM2G317584	1409	2458	0.9557	148.174
GRMZM2G078033	1409	2411	0.8971	151.063
GRMZM2G093900	1406	2095	0.8205	173.478
GRMZM2G134396	1406	2969	0.9616	122.41
GRMZM2G163154	1404	2245	0.9595	161.657
GRMZM2G068217	1394	4719	0.9943	76.3583
GRMZM2G017249	1390	1789	0.9994	200.839
GRMZM2G003565	1389	2107	0.9032	170.404
GRMZM2G076062	1384	2836	0.9661	126.146
GRMZM5G833124	1377	2163	0.9205	164.559
GRMZM2G353024	1372	1925	0.7584	184.233
GRMZM2G399073	1372	3370	0.7935	105.237
GRMZM2G098496	1369	1435	0.9289	246.601
GRMZM2G041697	1369	5460	0.933	64.8118
GRMZM2G010302	1367	1657	0.9107	213.25
GRMZM2G062554	1363	2106	0.6472	167.294
GRMZM2G117942	1361	792	0.6616	444.198
GRMZM2G089713	1359	3223	0.8405	108.994
GRMZM2G048371	1358	1839	0.9315	190.88
GRMZM2G135470	1352	2085	0.9103	167.615
GRMZM2G005887	1346	1929	0.7818	180.367
GRMZM2G084779	1342	2890	0.9249	120.032
GRMZM2G078781	1342	3037	0.971	114.222
GRMZM2G094497	1339	2063	0.9312	167.774
GRMZM2G450163	1332	2430	0.9091	141.691
GRMZM5G844173	1329	3982	0.954	86.2714
GRMZM2G177631	1322	4406	0.8107	77.5586
GRMZM2G113592	1318	3578	0.9544	95.2178
GRMZM2G113137	1316	4126	0.984	82.4461
GRMZM2G016323	1314	3574	0.8615	95.0351
GRMZM2G012052	1313	894	0.9452	379.639
GRMZM2G168382	1304	1943	0.5167	173.479
GRMZM2G352415	1302	1637	0.9811	205.592
GRMZM2G088309	1300	1228	0.8607	273.645
GRMZM2G147716	1297	1522	0.8344	220.277
GRMZM2G701082	1295	2080	0.8543	160.935
GRMZM2G060940	1291	1415	0.9731	235.838
GRMZM2G428391	1291	2628	0.8729	126.983
GRMZM5G872068	1289	1489	0.9167	223.77
GRMZM2G116658	1288	3968	0.9609	83.9049
GRMZM2G363460	1287	1839	0.9744	180.901
GRMZM5G894233	1285	2704	0.7559	122.84
GRMZM2G095727	1284	3454	0.9838	96.0917
GRMZM5G879278	1283	2327	0.8939	142.519
GRMZM2G439201	1282	2117	0.4176	156.535
GRMZM5G864414	1278	2755	0.9869	119.909
GRMZM2G127665	1275	3914	0.4594	84.204
GRMZM5G802801	1271	2186	0.9909	150.293
GRMZM2G125544	1270	2148	0.9604	152.831
GRMZM2G019236	1269	3864	0.949	84.8922
GRMZM2G134027	1264	2749	0.8949	118.854
GRMZM2G479608	1264	1204	0.9759	271.371
GRMZM2G181362	1264	3731	0.9622	87.572
AC233866.1	1264	1344	0.9829	243.103
GRMZM5G835213	1264	2521	0.6767	129.604
GRMZM2G065757	1261	2521	0.5625	129.296
GRMZM2G101480	1260	1195	0.5707	272.55
GRMZM2G137409	1256	2877	0.9148	112.848
GRMZM2G126038	1255	2781	0.8468	116.65
GRMZM2G135588	1253	2272	0.8785	142.556
GRMZM2G014805	1251	4173	0.9614	77.4912
GRMZM2G044469	1249	1566	0.977	206.165
GRMZM2G038636	1246	1630	0.8847	197.594
GRMZM2G128877	1240	2325	0.9763	137.861
GRMZM2G456568	1239	3377	0.7643	94.8382
GRMZM2G169384	1237	1793	0.9264	178.333
GRMZM2G060296	1230	2322	0.9561	136.926
GRMZM2G152963	1228	4346	0.8663	73.0385
GRMZM2G031545	1225	1283	0.7825	246.804
GRMZM2G146246	1222	1758	0.7418	179.678
AC233882.1	1217	3921	0.9572	80.23
GRMZM2G047139	1212	2283	0.8314	137.227
GRMZM5G815894	1209	1357	0.9086	230.298
GRMZM2G066024	1206	1877	0.7949	166.083
GRMZM2G035417	1205	2025	0.7847	153.817
GRMZM2G087901	1204	2059	0.9563	151.152
GRMZM2G018103	1200	1822	0.876	170.246
GRMZM2G056270	1199	1608	0.8489	192.742
GRMZM2G130987	1195	1797	0.9917	171.895
GRMZM2G343916	1194	3866	0.9827	79.8336
GRMZM2G069162	1193	2816	0.7283	109.509
GRMZM5G806449	1192	1974	0.9377	156.089
GRMZM2G028393	1187	759	0.6891	404.252
GRMZM2G104294	1181	2673	0.8447	114.207
GRMZM2G018950	1179	2086	0.9108	146.097
GRMZM2G015419	1174	3098	0.9661	97.9558
GRMZM2G105004	1172	3979	0.9105	76.1372
GRMZM2G099355	1170	7504	0.8326	40.3029
GRMZM2G424181	1168	4857	0.9887	62.161
GRMZM2G016511	1167	1149	0.9382	262.539
GRMZM2G128171	1167	2208	0.6549	136.62
GRMZM2G066460	1165	1365	0.8711	220.616
GRMZM5G837108	1163	1556	0.9287	193.203
AC205703.4	1162	3462	0.9419	86.7606
GRMZM2G098239	1161	2246	0.8157	133.618
GRMZM2G152041	1161	817	0.9865	367.327
GRMZM2G006130	1161	3931	0.419	76.3436
GRMZM2G358827	1161	3647	0.8974	82.2886
GRMZM2G124434	1160	1546	0.9211	193.951
GRMZM2G111818	1158	3859	0.9658	77.567
GRMZM2G114954	1154	1012	0.3389	294.76
GRMZM2G395844	1153	1205	0.5195	247.335
GRMZM2G027995	1152	1916	0.8894	155.418
GRMZM2G116135	1151	1070	0.8766	278.058
GRMZM2G159724	1147	2489	0.8212	119.119
GRMZM2G308203	1147	2934	0.971	101.052
GRMZM2G392975	1145	1674	0.7664	176.804
GRMZM5G864266	1143	4070	0.9106	72.5931
GRMZM2G169372	1143	1041	0.781	283.817
GRMZM2G001457	1142	2993	0.9906	98.6285
GRMZM2G106424	1142	1539	0.8655	191.81
GRMZM2G043822	1137	2103	0.8897	139.754
GRMZM2G172369	1136	3453	0.9415	85.0403
GRMZM2G134628	1135	2629	0.8962	111.596
GRMZM2G145715	1134	2069	0.9029	141.676
GRMZM2G149952	1133	1870	0.8406	156.614
GRMZM2G134806	1133	1359	0.8882	215.503
GRMZM2G015295	1132	2241	0.7885	130.571
GRMZM2G011070	1130	4285	0.9363	68.1665
GRMZM2G359038	1127	2356	0.9126	123.649
GRMZM2G155384	1123	3343	0.9393	86.8334
GRMZM2G115812	1123	7741	0.6524	37.4995
GRMZM2G069542	1122	3422	0.9296	84.7532
GRMZM5G848945	1121	2811	0.9523	103.083
GRMZM2G157462	1120	3384	0.9421	85.5521
GRMZM2G055331	1120	3938	0.938	73.5166
GRMZM2G085111	1119	4221	0.9412	68.5264
GRMZM2G457562	1117	1658	0.6791	174.145
GRMZM2G471142	1117	2132	0.9006	135.428
GRMZM2G126453	1115	3171	0.9464	90.8912
GRMZM2G014914	1111	1957	0.6132	146.746
GRMZM2G017229	1109	1996	0.9439	143.62
GRMZM2G456000	1105	2635	0.9552	108.399
GRMZM2G105019	1100	1745	0.8464	162.945
GRMZM2G345055	1096	3054	0.909	92.7651
GRMZM2G082916	1095	4837	0.9524	58.5169
GRMZM2G095955	1094	2344	0.7231	120.643
GRMZM2G043338	1091	1123	0.9332	251.124
GRMZM2G044038	1090	2100	0.8962	134.168
GRMZM2G127798	1089	2594	0.7687	108.518
GRMZM2G104542	1086	2342	0.8804	119.863
GRMZM2G012030	1085	6999	0.7128	40.0716
GRMZM2G362850	1085	3642	0.9396	77.0075
GRMZM2G098577	1083	3141	0.9007	89.1259
GRMZM2G074906	1079	5484	0.6904	50.8589
GRMZM2G118800	1074	2036	0.9003	136.355
GRMZM5G826714	1072	2080	0.9322	133.222
GRMZM2G118003	1072	2170	0.8834	127.696
GRMZM2G079236	1070	2981	0.952	92.7823
GRMZM2G125294	1069	6126	0.9559	45.107
GRMZM2G180720	1069	1918	0.9614	144.07
GRMZM2G073979	1067	1323	0.9373	208.472
GRMZM2G042992	1064	4464	0.9453	61.6113
GRMZM2G421857	1064	2598	0.6978	105.863
GRMZM2G084465	1060	1714	0.6336	159.859
GRMZM2G167932	1056	1794	0.9164	152.154
GRMZM2G006178	1055	2380	0.9824	114.583
GRMZM2G024612	1053	8129	0.9628	33.4838
GRMZM2G162786	1053	2585	0.9304	105.296
GRMZM2G105387	1051	2247	0.4949	120.905
GRMZM2G134917	1050	1791	0.8001	151.543
GRMZM2G134980	1048	1813	0.5841	149.419
GRMZM2G048434	1047	1931	0.9363	140.155
GRMZM2G169005	1041	1345	0.881	200.065
GRMZM2G080731	1041	1505	0.8631	178.796
GRMZM2G375222	1040	4849	0.9821	55.4402
GRMZM2G142315	1040	1298	0.9961	207.11
GRMZM2G169270	1039	4826	0.8616	55.6508
GRMZM2G015989	1038	2635	0.8137	101.826
GRMZM2G179523	1035	2591	0.9819	103.256
GRMZM2G036765	1034	2793	0.9212	95.6958
GRMZM2G366532	1034	2542	0.9386	105.145
GRMZM2G055970	1033	1766	0.8403	151.2
GRMZM2G027098	1033	1283	0.8753	208.121
GRMZM2G095593	1033	1348	0.9228	198.086
GRMZM2G063060	1032	2890	0.8661	92.305
GRMZM2G019267	1031	2431	0.775	109.627
GRMZM2G430600	1027	1954	0.5138	135.859
GRMZM2G102000	1027	3603	0.8887	73.68
GRMZM2G341271	1026	3160	0.9089	83.9274
GRMZM2G123540	1023	1899	0.9784	139.25
GRMZM2G005562	1021	2629	0.8342	100.387
GRMZM2G416069	1017	2003	0.9241	131.245
GRMZM2G083847	1017	2314	0.8176	113.606
GRMZM2G133173	1017	2715	0.9042	96.8265
GRMZM2G007587	1016	2124	0.8682	123.647
GRMZM5G827266	1015	1042	0.4175	251.792
GRMZM2G178958	1015	2170	0.7092	120.906
GRMZM2G422464	1014	6222	0.9462	42.1261
GRMZM2G063676	1013	3386	0.9415	77.3332
GRMZM2G013619	1011	1762	0.7111	148.316
GRMZM2G111846	1011	7881	0.9311	33.1599
GRMZM2G043489	1009	4104	0.8355	63.5517
GRMZM2G103430	1009	2032	0.9414	128.354
GRMZM2G077307	1003	3454	0.9253	75.0623
GRMZM2G108277	1000	1716	0.3986	150.635
GRMZM2G096548	999	2103	0.9287	122.792
GRMZM2G092959	998	2183	0.9579	118.173
GRMZM2G020920	996	4287	0.9536	60.055
GRMZM2G067042	996	238	0.9748	1081.75
GRMZM2G165413	995	3534	0.9788	72.7779
GRMZM2G315375	995	4672	0.9651	55.0508
GRMZM2G438895	994	4792	0.9295	53.6183
GRMZM5G862817	994	1788	0.7959	143.702
GRMZM2G137558	990	2697	0.9162	94.885
GRMZM2G147884	990	3823	0.6157	66.9382
GRMZM2G077837	990	1564	0.7487	163.622
GRMZM2G394827	989	1270	0.7283	201.296
GRMZM2G073725	989	1781	0.8259	143.541
GRMZM2G125635	988	2100	0.9576	121.613
GRMZM2G150772	984	5204	0.9794	48.8766
GRMZM2G111269	983	2440	0.927	104.137
GRMZM2G063850	983	2761	0.8424	92.0302
GRMZM2G055643	982	2104	0.8964	120.645
GRMZM2G113408	981	2677	0.7419	94.7248
GRMZM2G058522	980	1552	0.7017	163.222
GRMZM2G157027	976	2395	0.9599	105.339
GRMZM2G058227	974	1610	0.8547	156.378
GRMZM2G374574	974	6139	0.9482	41.0114
GRMZM2G014395	973	1976	0.9388	127.283
GRMZM2G144155	972	2881	0.9361	87.21
GRMZM2G109039	969	2062	0.8545	121.473
GRMZM2G047310	968	3851	0.8265	64.9748
GRMZM2G116086	967	2974	0.9045	84.0483
GRMZM2G173536	967	2166	0.8883	115.401
AC233949.1	965	2538	0.8562	98.2831
GRMZM2G109560	964	3264	0.9424	76.3432
GRMZM2G036708	964	1771	0.8295	140.702
GRMZM2G145236	962	2752	0.932	90.3587
GRMZM2G017835	962	2651	0.9672	93.8012
GRMZM2G026065	959	2419	0.9144	102.477
GRMZM2G434277	957	2736	0.9302	90.4147
GRMZM2G015933	954	1130	0.7664	218.229
GRMZM5G877388	951	1393	0.6382	176.471
GRMZM2G013986	951	2810	0.9605	87.4817
GRMZM2G360339	947	815	0.8221	300.356
GRMZM2G001652	945	3697	0.9207	66.0732
GRMZM2G157018	943	1001	0.9401	243.512
GRMZM2G472428	942	6423	0.9611	37.9102
GRMZM2G077356	941	1585	0.8196	153.463
GRMZM2G131473	941	1922	0.948	126.555
GRMZM2G007195	935	3057	0.7615	79.0605
GRMZM2G324471	935	1502	0.8582	160.911
GRMZM2G107116	935	4665	0.949	51.8088
GRMZM2G150256	932	1894	0.9952	127.198
GRMZM2G083173	932	2893	0.9713	83.2743
GRMZM2G400173	932	3783	0.9107	63.6829
GRMZM2G019183	932	4551	0.8247	52.9361
GRMZM2G044306	932	6143	0.9541	39.2174
GRMZM2G154218	932	1782	0.6016	135.192
GRMZM2G089406	929	5242	0.9868	45.8102
GRMZM5G858454	929	3201	0.7501	75.0193
GRMZM2G158872	928	3297	0.9351	72.7566
GRMZM2G087326	927	1493	0.9277	160.496
GRMZM2G114570	927	2689	0.8271	89.1112
GRMZM2G010960	926	4930	0.9507	48.552
GRMZM2G303631	926	2712	0.642	88.2601
GRMZM2G074479	921	1837	0.4627	129.597
GRMZM2G113202	920	3966	0.8853	59.9623
AC155377.1	919	5390	0.9629	44.0727
GRMZM2G108780	919	1223	0.6247	194.237
AC207890.3	918	2961	0.9892	80.1397
GRMZM2G101446	917	1182	0.6286	200.537
GRMZM2G701689	916	3066	0.9609	77.2265
GRMZM2G088088	916	2476	0.96	95.6287
GRMZM5G823004	914	2314	0.9836	102.1
GRMZM2G116034	914	2541	0.7143	92.979
GRMZM2G109959	914	790	0.6177	299.063
GRMZM2G100620	909	1504	0.8218	156.228
GRMZM2G459746	907	3369	0.9231	69.5904
GRMZM2G130230	906	2115	0.8364	110.729
GRMZM5G840955	906	1263	0.9303	185.425
GRMZM2G094742	905	1245	0.5928	187.898
GRMZM2G181551	905	1534	0.8194	152.499
GRMZM2G066413	904	1770	0.8153	132.02
GRMZM2G004534	903	2241	0.9197	104.157
GRMZM5G889999	902	2930	0.9177	79.576
AC203535.4	899	2778	0.9928	83.6509
GRMZM2G030784	899	1700	0.6565	136.695
GRMZM2G128491	899	1264	0.9422	183.847
GRMZM2G130889	898	2503	0.8402	92.7382
GRMZM2G174757	898	2533	0.9617	91.6399
GRMZM2G005710	897	1285	0.9027	180.44
GRMZM5G813470	897	2430	0.9354	95.4178
AC199526.5	897	2259	0.1744	102.641
GRMZM2G062499	897	1797	0.9644	129.029
GRMZM2G057514	896	2024	0.8409	114.43
GRMZM2G093050	896	3467	0.9213	66.8032
GRMZM2G073535	896	2115	0.6969	109.507
GRMZM2G151087	896	1511	0.8921	153.28
GRMZM2G010884	895	1676	0.7798	138.036
GRMZM2G020484	895	2950	0.8492	78.4231
GRMZM2G009845	895	2553	0.9369	90.6182
GRMZM2G462140	894	1704	0.9184	135.616
GRMZM2G002825	893	1377	0.6057	167.633
GRMZM2G061928	893	1806	0.6002	127.814
GRMZM2G010909	893	1199	0.8524	192.52
GRMZM2G123922	893	3408	0.9372	67.7322
GRMZM2G117707	892	2779	0.6384	82.9697
GRMZM2G150484	892	3373	0.9229	68.3584
GRMZM2G055575	891	1905	0.8577	120.9
GRMZM2G101875	890	2330	0.9107	98.7364
GRMZM2G071172	890	3654	0.9302	62.96
GRMZM2G354610	889	2247	0.8856	102.269
GRMZM2G124335	889	2470	0.8445	93.0354
GRMZM2G009808	889	3621	0.8812	63.4624
GRMZM2G065494	888	3407	0.6522	67.3727
GRMZM2G473001	888	3540	0.9181	64.8415
GRMZM2G016655	887	2767	0.974	82.8624
GRMZM2G122277	887	3599	0.8038	63.7067
GRMZM2G059151	885	2322	0.8704	98.52
GRMZM5G831993	885	1838	0.9489	124.463
GRMZM2G052088	885	1627	0.8654	140.604
GRMZM2G061562	885	3776	0.9168	60.5835
GRMZM2G104017	884	1786	0.6674	127.942
GRMZM2G176465	883	4063	0.9166	56.1768
GRMZM2G365160	883	2100	0.92	108.689
GRMZM2G064868	883	3925	0.9544	58.152
GRMZM2G042074	882	3944	0.9815	57.8063
GRMZM2G163081	881	1513	0.8374	150.515
GRMZM2G067225	881	2380	0.7416	95.6846
GRMZM2G180324	880	1721	0.9733	132.174
GRMZM2G145518	879	1779	0.7988	127.719
GRMZM2G120304	877	1401	0.95	161.81
GRMZM2G153263	877	2182	0.8905	103.893
GRMZM2G070360	876	1282	0.9056	176.628
GRMZM2G085577	876	2881	0.9969	78.5967
GRMZM2G162688	875	2194	0.9503	103.09
GRMZM2G027663	875	2669	0.9741	84.7428
GRMZM5G877316	873	1762	0.9642	128.071
GRMZM2G446050	873	5975	0.7721	37.7676
GRMZM2G423456	871	4319	0.9407	52.1289
GRMZM2G375904	871	2600	0.8488	86.5941
GRMZM2G176253	871	2250	0.9236	100.064
GRMZM2G160316	870	2395	0.8998	93.8981
GRMZM2G347056	869	2375	0.9427	94.58
GRMZM2G010363	868	1789	0.8614	125.416
GRMZM2G153162	866	6145	0.9535	36.4283
GRMZM2G361064	866	1586	0.7371	141.143
GRMZM5G826911	865	2219	0.868	100.763
GRMZM2G101760	865	3453	0.8807	64.7534
GRMZM5G863385	864	2643	0.9323	84.5006
GRMZM2G468855	864	1385	0.8744	161.253
GRMZM2G361605	863	3997	0.7788	55.811
GRMZM5G854138	862	961	0.8543	231.861
GRMZM2G468260	859	2615	0.7235	84.9112
GRMZM2G102161	858	1215	0.9276	182.538
GRMZM2G062354	858	2848	0.9505	77.8737
GRMZM2G013114	858	3335	0.919	66.502
GRMZM2G180988	857	3654	0.922	60.6255
GRMZM2G335521	856	1015	0.931	217.997
GRMZM2G444801	856	2618	0.9572	84.5176
GRMZM2G146819	855	4332	0.9716	51.0177
GRMZM2G409865	854	2098	0.9952	105.219
GRMZM2G176307	853	2014	0.6351	109.48
GRMZM2G059015	852	3300	0.9312	66.7373
GRMZM2G014788	848	3986	0.9669	54.9923
GRMZM2G155111	847	3487	0.8856	62.7877
GRMZM2G074914	845	1893	0.8722	115.385
GRMZM5G801875	845	2165	0.9201	100.889
GRMZM2G341729	844	1785	0.5255	122.221
GRMZM2G127101	839	2362	0.8975	91.8175
GRMZM2G015875	838	4034	0.9462	53.6972
GRMZM2G439339	834	6614	0.8763	32.5946
GRMZM2G447745	834	5941	0.8404	36.2869
GRMZM2G054123	833	1838	0.7813	117.15
GRMZM5G871143	833	3296	0.8978	65.3283
GRMZM2G057441	832	3681	0.8807	58.4253
GRMZM2G053600	831	2201	0.9241	97.5943
GRMZM2G047093	831	3465	0.9688	61.9928
GRMZM2G123537	831	3884	0.9874	55.3051
GRMZM2G146697	831	3560	0.9475	60.3385
GRMZM2G107757	831	1566	0.7599	137.168
GRMZM2G008507	827	3303	0.9443	64.7203
GRMZM2G001895	827	6485	0.9107	32.9639
GRMZM2G106590	827	2121	0.834	100.788
GRMZM2G176397	826	3788	0.8994	56.3655
GRMZM2G135186	826	1865	0.8627	114.484
GRMZM2G033478	825	6597	0.9588	32.3259
GRMZM2G018275	824	1393	0.9368	152.904
GRMZM2G006080	823	3172	0.9571	67.0672
GRMZM2G041980	823	1505	0.8525	141.354
GRMZM2G095124	822	3204	0.9476	66.3166
GRMZM2G073498	821	2231	0.8817	95.1233
GRMZM2G149636	821	2218	0.9441	95.6808
GRMZM2G170798	820	3858	0.8409	54.9408
GRMZM2G107082	820	1660	0.9554	127.688
GRMZM2G166089	819	2796	0.9446	75.7164
GRMZM2G048472	818	1975	0.9696	107.061
GRMZM2G157470	818	1673	0.9151	126.386
GRMZM5G881464	816	3191	0.938	66.1008
GRMZM2G173067	816	1987	0.6975	106.154
GRMZM2G122666	813	1444	0.8345	145.535
GRMZM2G127729	813	2848	0.9477	73.7894
GRMZM2G025598	813	2882	0.8709	72.9189
GRMZM2G384327	813	2122	0.9317	99.0349
GRMZM2G138419	812	3753	0.9675	55.9269
GRMZM2G035985	811	4170	0.7463	50.2722
GRMZM2G431708	811	2982	0.9306	70.3002
GRMZM2G084063	811	1162	0.4587	180.409
GRMZM2G035222	810	1609	0.8484	130.128
GRMZM2G001500	809	2654	0.8662	78.7936
GRMZM2G072088	806	4033	0.9323	51.6595
GRMZM2G082390	806	1119	0.7373	186.187
GRMZM2G084149	804	1880	0.9266	110.546
GRMZM2G160585	803	2332	0.8808	89.0082
GRMZM2G082855	801	3756	0.9196	55.1252
GRMZM2G052869	799	1266	0.5632	163.138
GRMZM2G165944	798	4079	0.9657	50.5699
GRMZM2G060866	797	1605	0.896	128.359
GRMZM2G165998	797	1914	0.4781	107.637
GRMZM2G137348	797	3537	0.8391	58.2461
GRMZM2G019266	796	2363	0.953	87.0748
GRMZM2G075320	796	4953	0.9255	41.5421
GRMZM2G375984	796	2538	0.9243	81.0708
GRMZM2G108133	795	2224	0.8674	92.4008
GRMZM2G107815	795	2175	0.9706	94.4824
GRMZM2G156673	794	1736	0.5588	118.226
GRMZM2G147671	793	1715	0.902	119.523
GRMZM2G027723	793	3924	0.9516	52.2381
GRMZM2G002898	793	2176	0.8419	94.2014
GRMZM2G127453	792	2333	0.6177	87.7513
GRMZM5G824944	792	2344	0.93	87.3395
GRMZM2G141587	792	3353	0.9251	61.0569
GRMZM2G365374	791	2517	0.8927	81.2338
GRMZM2G111720	790	3993	0.8758	51.1412
GRMZM2G118037	790	939	0.7913	217.473
GRMZM2G386229	788	2933	0.8796	69.4476
GRMZM2G007404	786	1817	0.6219	111.818
GRMZM2G014004	786	2049	0.9561	99.1571
GRMZM2G168096	785	6322	0.9815	32.0966
GRMZM2G388608	783	821	0.9257	246.526
GRMZM2G448001	783	2381	0.9089	85.0052
GRMZM2G112805	783	1357	0.9609	149.151
GRMZM2G094388	783	1213	0.9002	166.857
GRMZM2G027875	782	2942	0.8797	68.708
GRMZM2G174549	782	1863	0.6833	108.502
GRMZM2G149153	781	7521	0.94	26.8422
GRMZM2G031107	780	1956	0.9279	103.079
GRMZM2G010342	780	5035	0.9678	40.0441
GRMZM2G110153	779	1210	0.9868	166.416
GRMZM2G130586	779	3155	0.9081	63.8236
GRMZM2G117836	778	3418	0.8956	58.837
GRMZM2G056645	777	8354	0.9066	24.042
GRMZM2G155837	776	3727	0.8162	53.8202
GRMZM2G058745	775	2136	0.8914	93.7872
AC211394.4	775	1980	0.9722	101.177
GRMZM2G013318	774	2511	0.9339	79.6778
GRMZM2G110378	774	2004	0.7375	99.8358
GRMZM2G119782	773	861	0.9024	232.07
GRMZM2G318475	773	1400	0.8157	142.723
GRMZM2G169688	773	2801	0.9182	71.3361
GRMZM2G011355	771	1739	0.3772	114.604
GRMZM2G316967	771	3804	0.9642	52.3911
GRMZM2G104876	771	2626	0.7018	75.8932
GRMZM2G179737	770	1565	0.9291	127.18
GRMZM2G314133	770	5197	0.914	38.2985
GRMZM2G010637	769	6355	0.8505	31.2791
GRMZM2G025242	768	1637	0.8858	121.271
GRMZM2G110423	768	2152	0.902	92.2491
GRMZM2G036609	768	5897	0.8801	33.6646
GRMZM2G346455	768	1710	0.8363	116.094
GRMZM2G057935	767	4151	0.9053	47.7624
GRMZM2G174644	767	2003	0.9286	98.9823
GRMZM2G478709	766	2407	0.9136	82.2614
GRMZM2G055619	765	5813	0.7309	34.0177
GRMZM2G039455	763	3704	0.9017	53.2472
GRMZM2G149576	762	2204	0.9242	89.3689
GRMZM2G406674	762	3182	0.6823	61.9011
GRMZM2G124886	762	3688	0.8961	53.4081
GRMZM2G094712	761	2163	0.7855	90.9434
GRMZM2G131969	761	1981	0.8228	99.2987
GRMZM2G024571	761	4598	0.8823	42.7818
GRMZM2G395508	760	1827	0.9184	107.527
GRMZM2G351018	759	4688	0.882	41.8502
GRMZM2G333980	759	1449	0.8916	135.399
GRMZM2G173747	758	948	0.8428	206.683
GRMZM5G866843	757	2317	0.965	84.4526
GRMZM2G025992	757	1570	0.6682	124.635
GRMZM2G119894	757	4676	0.9059	41.847
GRMZM2G458549	756	2186	0.8161	89.3953
GRMZM2G166694	756	3274	0.8696	59.6879
GRMZM2G435373	755	1839	0.9309	106.123
GRMZM5G874500	755	2113	0.9593	92.3614
GRMZM2G328988	754	5489	0.8619	35.5076
GRMZM2G370715	754	4703	0.9496	41.4419
GRMZM2G460406	753	1630	0.8908	119.413
GRMZM2G052100	752	936	0.6111	207.675
GRMZM2G311165	752	5205	0.6363	37.3457
GRMZM2G010871	752	2369	0.9409	82.0533
GRMZM2G179941	751	3717	0.9454	52.2265
GRMZM2G060213	751	3967	0.9249	48.9352
GRMZM5G813217	750	2747	0.9621	70.5742
GRMZM2G065083	750	1047	0.8262	185.165
GRMZM2G154958	750	1964	0.8727	98.7104
GRMZM2G147191	749	2433	0.9819	79.5762
GRMZM2G329144	749	1018	0.8919	190.185
GRMZM2G083810	748	1193	0.8248	162.071
GRMZM2G090245	748	917	0.9749	210.851
GRMZM2G106650	748	1952	0.7684	99.0524
GRMZM2G019404	748	3384	0.6421	57.1366
GRMZM2G071620	746	1784	0.7259	108.09
GRMZM2G448607	746	1365	0.9502	141.27
GRMZM2G017414	744	3289	0.8127	58.4726
GRMZM2G078641	743	3933	0.1838	48.8324
GRMZM2G127609	740	1809	0.6656	105.739
GRMZM2G166646	739	2051	0.9878	93.137
GRMZM2G127948	738	1815	0.6623	105.105
GRMZM2G066496	738	1463	0.8763	130.393
GRMZM2G089484	737	2581	0.9609	73.8113
GRMZM2G032807	737	1009	0.9713	188.808
GRMZM2G416484	736	3664	0.9492	51.9237
GRMZM5G874955	736	2382	0.9353	79.8692
GRMZM2G035405	735	2932	0.956	64.7987
GRMZM2G165357	735	2098	0.6873	90.5576
GRMZM2G099363	735	2185	0.6297	86.9519
GRMZM2G153815	735	2716	0.8855	69.9521
GRMZM2G104418	734	1634	0.9284	116.115
GRMZM2G150248	734	2244	0.8881	84.5506
GRMZM2G140590	734	2509	0.9442	75.6203
GRMZM2G018375	734	1655	0.8671	114.641
GRMZM2G140917	733	3453	0.9757	54.872
GRMZM2G181359	732	1723	0.975	109.817
GRMZM2G464137	732	1726	0.8621	109.626
GRMZM2G119696	732	3725	0.8341	50.7958
GRMZM2G093032	730	1980	0.9439	95.3018
GRMZM2G316191	729	7924	0.8243	23.7808
GRMZM2G129018	729	1939	0.9077	97.1836
GRMZM2G442658	728	2277	0.7277	82.6441
GRMZM2G144653	728	771	0.9403	244.073
GRMZM2G079308	727	2827	0.6809	66.474
GRMZM2G031352	726	3352	0.8079	55.9855
GRMZM2G159908	726	1951	0.8391	96.1884
GRMZM2G083437	726	3274	0.9734	57.3193
GRMZM2G083716	724	2879	0.7659	65.004
GRMZM2G044027	724	2234	0.6347	83.772
GRMZM5G803952	723	970	0.8897	192.668
GRMZM2G066618	723	2612	0.9361	71.5498
GRMZM2G164663	723	2593	0.8473	72.0741
GRMZM2G361256	723	4649	0.9621	40.1996
GRMZM2G057380	722	4903	0.907	38.0644
GRMZM2G153722	722	6166	0.9295	30.2675
GRMZM2G401308	720	1580	0.4892	117.793
GRMZM2G038783	720	1610	0.9373	115.598
GRMZM5G891159	719	4616	0.9051	40.263
GRMZM2G016802	718	2991	0.9582	62.0514
GRMZM2G138589	718	2491	0.8374	74.5065
GRMZM2G033876	718	4308	0.9649	43.0816
GRMZM2G057402	718	8637	0.9121	21.4884
GRMZM2G458728	715	3524	0.8868	52.4461
GRMZM2G144995	714	2067	0.8737	89.2896
GRMZM2G106960	714	1415	0.7392	130.432
GRMZM2G062914	714	1779	0.9365	103.745
GRMZM2G165931	714	2643	0.9818	69.8304
GRMZM2G081949	713	1660	0.8271	111.026
GRMZM2G335287	713	5545	0.8788	33.2377
GRMZM2G378906	711	3430	0.8819	53.582
GRMZM2G429113	711	3188	0.8601	57.6494
GRMZM2G126290	708	2651	0.9178	69.0346
GRMZM2G462613	707	3661	0.9071	49.9187
GRMZM2G158568	707	2285	0.5282	79.9791
GRMZM2G314546	706	5264	0.9109	34.6683
GRMZM2G451314	704	1922	0.845	94.6809
GRMZM2G144971	704	5683	0.9254	32.0212
GRMZM2G036092	703	1501	0.8974	121.065
GRMZM2G474798	703	8784	0.8476	20.6874
GRMZM2G404897	701	2333	0.8607	77.6688
GRMZM2G169820	701	3885	0.9027	46.6413
GRMZM2G031846	701	2665	0.8938	67.993
GRMZM2G304362	701	3366	0.866	53.8328
GRMZM2G020840	700	1576	0.835	114.811
GRMZM2G157061	699	3109	0.9386	58.1165
GRMZM2G142088	699	3013	0.8875	59.9682
GRMZM2G134797	699	1237	0.7526	146.067
GRMZM2G140339	699	1707	0.9695	105.849
GRMZM2G074792	698	2768	0.8385	65.1827
GRMZM2G048883	697	2928	0.8941	61.5326
GRMZM2G374065	697	2874	0.9541	62.6887
GRMZM2G073954	696	2635	0.948	68.2766
GRMZM2G154366	696	4384	0.969	41.0376
GRMZM2G147854	696	2118	0.9051	84.9428
GRMZM2G432722	695	3203	0.9466	56.0882
GRMZM2G169890	695	1546	0.5944	116.203
GRMZM2G079823	694	2709	0.9793	66.2207
GRMZM2G021110	693	1918	0.9416	93.3959
GRMZM2G074267	693	2684	0.8659	66.7412
GRMZM2G083176	692	2698	0.8143	66.2991
AC214360.3	692	2772	0.9867	64.5292
GRMZM2G139041	691	2318	0.8162	77.0562
GRMZM2G439311	691	2152	0.7923	83.0002
GRMZM2G109121	691	2357	0.9436	75.7812
GRMZM2G090300	690	2144	0.9095	83.1893
GRMZM2G063806	689	3409	0.9745	52.2439
GRMZM2G101523	689	3573	0.9656	49.8459
GRMZM2G125271	689	1178	0.8956	151.188
GRMZM2G033208	689	3653	0.6595	48.7543
GRMZM2G031824	689	2157	0.968	82.5681
GRMZM2G415215	688	7897	0.916	22.5201
GRMZM2G119361	687	2728	0.9545	65.0962
GRMZM2G110922	686	1656	0.9197	107.08
GRMZM2G438551	686	1002	0.8263	176.97
GRMZM2G107473	685	1440	0.9465	122.962
GRMZM2G029107	685	1097	0.8277	161.409
GRMZM2G042040	684	2491	0.4135	70.9783
GRMZM2G113062	684	1875	0.9045	94.297
GRMZM2G163888	684	3110	0.9199	56.8511
GRMZM2G330218	683	3956	0.9724	44.628
GRMZM2G115775	682	1449	0.8647	121.663
GRMZM2G407249	681	1720	0.3	102.344
GRMZM2G351125	680	4361	0.931	40.3057
GRMZM2G106906	680	1157	0.8116	151.921
GRMZM2G322348	679	3740	0.8869	46.929
GRMZM2G079668	679	2963	0.8097	59.2354
GRMZM2G467169	678	3479	0.948	50.3754
GRMZM2G395354	678	1258	0.9006	139.313
GRMZM5G851266	677	2172	0.9853	80.5698
AC149475.2	677	4569	0.6964	38.3011
GRMZM5G883417	677	1567	0.9911	111.677
GRMZM2G061096	676	2608	0.8972	67.0012
GRMZM2G037614	675	1796	0.7361	97.1495
GRMZM2G069095	674	3105	0.8599	56.1102
GRMZM2G148453	673	1485	0.8519	117.147
GRMZM2G119755	673	836	0.9749	208.09
GRMZM2G093313	672	2055	0.9976	84.528
GRMZM2G027451	672	2035	0.6152	85.3588
GRMZM2G029583	671	1943	0.8827	89.2674
GRMZM2G071790	671	1927	0.8967	90.0086
GRMZM2G043435	670	3912	0.831	44.271
GRMZM5G887054	670	1182	0.8012	146.521
GRMZM2G306679	669	951	0.8528	181.84
GRMZM2G071844	669	1660	0.8157	104.174
GRMZM2G009443	668	3270	0.9196	52.8046
GRMZM2G053781	668	2354	0.9397	73.3522
GRMZM2G441583	668	3795	0.9665	45.4996
GRMZM2G398288	668	4521	0.969	38.1931
GRMZM2G140867	667	1385	0.8563	124.486
GRMZM2G045987	667	3151	0.887	54.7168
GRMZM2G159295	667	1759	0.9426	98.0174
GRMZM2G151195	667	3905	0.9708	44.1518
GRMZM2G160354	667	776	0.8273	222.181
GRMZM2G099337	666	5106	0.9612	33.716
GRMZM2G033570	666	2707	0.8825	63.5959
GRMZM2G109429	665	1829	0.5571	93.9834
GRMZM2G177005	665	1036	0.8764	165.922
GRMZM2G170281	664	2502	0.96	68.6
GRMZM2G396553	664	3369	0.8774	50.946
GRMZM2G153615	664	2557	0.8443	67.1244
GRMZM2G175273	664	646	0.935	265.692
GRMZM2G098039	664	3750	0.9032	45.7699
GRMZM2G326472	664	4202	0.9067	40.8465
GRMZM2G393471	664	7061	0.9172	24.3078
GRMZM2G303374	663	1992	0.3173	86.0335
GRMZM2G032409	662	2211	0.9882	77.3949
GRMZM2G102596	661	1403	0.7705	121.783
GRMZM2G425249	661	1886	0.9449	90.5947
GRMZM2G176546	660	1812	0.8836	94.1519
GRMZM2G053023	658	1007	0.6783	168.904
GRMZM5G806387	658	866	0.8048	196.404
GRMZM2G474531	657	2274	0.8773	74.6824
GRMZM2G012041	657	3955	0.9679	42.94
GRMZM2G320013	656	3442	0.9399	49.2647
GRMZM2G050193	654	2100	0.9481	80.5011
GRMZM2G169095	653	2569	0.8863	65.7041
GRMZM2G010054	653	4159	0.9396	40.5852
GRMZM5G815009	653	1074	0.8836	157.164
GRMZM2G058870	652	5732	0.9494	29.4025
GRMZM2G167872	650	1672	0.9211	100.489
GRMZM2G012501	650	5122	0.7757	32.8033
GRMZM2G144726	650	2513	0.7501	66.8597
GRMZM5G821988	649	2262	0.9735	74.1644
GRMZM2G109009	649	3222	0.9429	52.067
GRMZM2G111666	649	2440	0.9176	68.754
GRMZM2G012319	649	4260	0.8202	39.3802
GRMZM2G146115	648	1730	0.9422	96.8216
GRMZM2G156068	648	1230	0.8748	136.18
GRMZM2G127756	647	2503	0.9433	66.817
GRMZM2G126507	647	1965	0.828	85.1109
GRMZM2G164020	647	1622	0.7719	103.109
GRMZM2G138907	646	1809	0.874	92.3075
GRMZM5G899349	646	2086	0.9487	80.05
GRMZM2G341747	645	3552	0.9707	46.9386
GRMZM2G171430	645	2039	0.487	81.7684
GRMZM2G140726	643	2879	0.8885	57.7315
GRMZM5G829894	643	1562	0.8681	106.408
GRMZM2G082227	643	1627	0.976	102.157
GRMZM2G071659	643	1546	0.749	107.509
GRMZM2G141258	642	6058	0.8706	27.3936
GRMZM2G345840	641	2795	0.9911	59.2815
GRMZM5G836182	641	1072	0.9058	154.563
GRMZM2G157317	640	1977	0.9469	83.679
GRMZM2G006107	640	2983	0.9635	55.4587
GRMZM2G160463	639	1190	0.8067	138.802
GRMZM2G087186	639	2506	0.8436	65.9118
GRMZM2G025231	639	4171	0.8986	39.6008
GRMZM2G040397	639	1932	0.9068	85.4943
GRMZM2G115674	638	1891	0.899	87.2112
GRMZM2G138425	637	3546	0.7927	46.4348
GRMZM2G008456	637	2341	0.95	70.3366
GRMZM2G469523	636	1126	0.9263	146.003
GRMZM2G101711	636	4566	0.9212	36.0051
GRMZM2G336871	636	1347	0.4929	122.049
GRMZM2G019919	635	2910	0.9608	56.4058
GRMZM2G025074	635	2296	0.9525	71.49
GRMZM2G172244	635	1097	0.7156	149.627
GRMZM2G401869	635	6555	0.9208	25.0406
GRMZM2G425482	635	1193	0.8793	137.587
GRMZM2G086496	633	2492	0.9575	65.6597
GRMZM2G157384	633	1514	0.8375	108.074
GRMZM2G042933	632	2259	0.761	72.3176
GRMZM2G099657	631	1683	0.7611	96.9144
GRMZM2G114182	630	4532	0.8279	35.933
GRMZM2G481440	629	1865	0.9839	87.1796
GRMZM2G178756	629	2281	0.9342	71.2802
GRMZM2G003489	629	1954	0.9754	83.2088
GRMZM5G825515	627	3217	0.9036	50.3802
AC225205.3	627	1110	0.7919	146.012
GRMZM2G082185	626	1680	0.7845	96.3182
GRMZM2G034362	626	3733	0.9839	43.3471
GRMZM2G102499	625	2206	0.4742	73.2348
GRMZM2G121683	625	2585	0.8395	62.4975
GRMZM2G424857	625	3412	0.5724	47.3494
GRMZM5G805387	625	1976	0.581	81.7591
GRMZM2G097249	625	3600	0.9567	44.8767
GRMZM2G060611	625	3205	0.8977	50.4075
GRMZM2G055960	624	3427	0.7706	47.0667
GRMZM2G145854	624	2868	0.8916	56.2404
GRMZM2G098569	623	1568	0.8909	102.703
GRMZM2G166658	623	2272	0.8658	70.8799
AC155434.2	623	5208	0.9159	30.9215
GRMZM2G164352	622	2271	0.9828	70.7973
GRMZM2G480002	622	5453	0.9527	29.4848
GRMZM2G024315	622	1555	0.9826	103.396
GRMZM2G375807	621	3258	0.9362	49.2701
GRMZM2G064799	621	2559	0.8116	62.7285
GRMZM2G136571	621	1530	0.998	104.916
AC217358.3	621	1935	0.7576	82.9572
GRMZM2G387890	621	3148	0.9517	50.9918
GRMZM2G366150	621	2473	0.9588	64.9099
GRMZM2G092652	620	2601	0.7393	61.6162
GRMZM2G047274	620	1806	0.9756	88.7395
GRMZM2G021331	620	2290	0.8096	69.9841
GRMZM2G064695	619	1952	0.8668	81.9698
GRMZM2G131177	619	2746	0.9512	58.2684
GRMZM2G100913	619	2297	0.973	69.6583
GRMZM2G097854	618	1760	0.7648	90.7651
GRMZM2G122810	616	1711	0.8393	93.0623
GRMZM2G062076	616	1304	0.7416	122.109
GRMZM2G068657	616	2015	0.9687	79.0222
AC211737.3	616	2115	0.8279	75.2859
GRMZM2G027049	616	3722	0.8313	42.7807
GRMZM2G155709	615	2806	0.8742	56.654
GRMZM2G094123	615	1984	0.9415	80.1266
GRMZM2G005552	614	1385	0.9661	114.594
GRMZM5G872392	613	1852	0.9449	85.5584
GRMZM2G161868	613	2068	0.7074	76.6219
GRMZM2G061487	613	1569	0.9496	100.991
GRMZM2G001191	613	2619	0.9851	60.5018
GRMZM2G013236	613	2258	0.9021	70.1746
GRMZM2G450920	612	6755	0.8551	23.4191
GRMZM5G809587	612	2208	0.8736	71.6466
GRMZM2G077299	612	2360	0.9462	67.0321
GRMZM2G157621	612	3654	0.887	43.2938
GRMZM2G000264	612	2152	0.8192	73.511
AC217401.3	611	2060	0.8981	76.6685
GRMZM2G159744	610	4590	0.9102	34.3527
GRMZM2G146951	610	2476	0.9544	63.6828
GRMZM2G020040	610	3529	0.8546	44.6809
GRMZM5G851698	610	1304	0.8152	120.919
GRMZM2G142157	609	2230	0.8951	70.592
GRMZM2G082174	609	1994	0.8937	78.947
GRMZM2G334457	609	3958	0.93	39.7727
GRMZM2G023163	609	2158	0.8475	72.9473
GRMZM2G057674	609	2666	0.7689	59.0473
GRMZM2G109405	607	2140	0.6893	73.3193
GRMZM2G358311	607	3898	0.9669	40.2522
GRMZM2G141432	607	1560	0.5103	100.579
GRMZM2G340065	606	3111	0.4896	50.3519
GRMZM2G050984	606	2354	0.986	66.5441
AC197705.4	606	2895	0.4401	54.1087
GRMZM2G051792	606	3803	0.9035	41.1898
GRMZM2G308106	606	1556	0.9447	100.671
GRMZM2G169671	606	1287	0.8943	121.713
GRMZM5G887631	605	2793	0.8951	55.9922
GRMZM2G456570	605	4635	0.7873	33.7403
GRMZM2G137236	605	3916	0.846	39.9352
GRMZM2G350802	604	2316	0.9827	67.4127
GRMZM2G433162	604	2130	0.9371	73.2994
GRMZM2G412899	603	2176	0.9926	71.6311
GRMZM2G056247	603	1915	0.9222	81.3939
AC215244.3	603	1558	0.9377	100.044
GRMZM2G101859	602	913	0.8751	170.439
GRMZM2G134613	601	1846	0.8218	84.1562
GRMZM2G120674	600	1133	0.7502	136.888
GRMZM2G162992	600	2577	0.9286	60.1839
GRMZM2G141784	599	1796	0.9477	86.2112
GRMZM2G307252	599	1979	0.8565	78.2392
GRMZM2G028313	599	2249	0.8951	68.8463
GRMZM2G343972	598	2418	0.9785	63.9276
AC196426.3	598	2235	0.9736	69.1619
GRMZM2G029186	598	4584	0.9455	33.721
GRMZM2G154489	598	2306	0.9085	67.0325
GRMZM2G396292	596	1397	0.7294	110.279
GRMZM5G899308	596	1828	0.9912	84.2778
GRMZM2G140051	596	1713	0.8733	89.9357
GRMZM2G165926	595	3105	0.5643	49.5335
GRMZM2G158248	595	2344	0.8618	65.6149
GRMZM2G160687	595	2087	0.7456	73.695
GRMZM2G035584	595	1910	0.8518	80.5243
GRMZM2G053898	595	1061	0.688	144.959
GRMZM2G311665	595	3385	0.9462	45.4362
GRMZM2G308064	594	3722	0.9371	41.2528
GRMZM2G145175	594	1538	0.8908	99.8328
GRMZM2G030016	593	1145	0.6524	133.873
GRMZM2G080270	593	2494	0.925	61.4613
GRMZM2G174926	593	2781	0.9507	55.1184
GRMZM2G441347	593	2519	0.9464	60.8513
GRMZM2G021621	591	1685	0.7703	90.6632
GRMZM2G098819	591	1452	0.814	105.212
GRMZM2G397247	590	3899	0.8038	39.1149
GRMZM2G035557	589	883	0.9241	172.424
GRMZM2G023289	589	2474	0.9014	61.5402
GRMZM2G052435	589	3891	0.9039	39.1289
GRMZM2G018508	589	3684	0.93	41.3275
GRMZM2G000622	589	4869	0.947	31.2693
GRMZM2G045275	589	3050	0.9502	49.9182
GRMZM2G114459	588	7418	0.8799	20.4896
GRMZM2G148709	588	2304	0.908	65.9687
GRMZM2G135795	587	992	0.9526	152.957
GRMZM2G098076	587	2352	0.9456	64.5125
GRMZM2G041770	587	4484	0.8475	33.8389
GRMZM2G007729	587	1186	0.8406	127.937
GRMZM2G020156	587	2071	0.9406	73.2658
GRMZM2G558539	586	1582	0.9134	95.749
GRMZM2G138676	586	2523	0.8506	60.0376
GRMZM2G155123	585	3632	0.9358	41.6345
GRMZM2G062953	585	2619	0.9485	57.7383
GRMZM2G113216	585	2166	0.9501	69.8137
GRMZM2G077757	584	2464	0.9395	61.2654
GRMZM2G130558	584	2024	0.6996	74.584
GRMZM5G813627	584	2417	0.9677	62.4568
GRMZM2G042089	584	2160	0.9171	69.888
GRMZM2G122863	584	2276	0.9156	66.326
GRMZM2G434541	583	573	0.8534	263.001
GRMZM2G177781	583	2587	0.9385	58.2526
GRMZM2G130432	583	1663	0.9441	90.6191
GRMZM2G179097	583	3173	0.9177	47.4943
GRMZM2G035268	583	2031	0.9892	74.1997
GRMZM2G056079	581	3283	0.9007	45.7455
GRMZM2G462325	581	4113	0.6628	36.5141
GRMZM2G059893	581	1368	0.7741	109.783
GRMZM2G132184	581	3393	0.7395	44.2625
GRMZM2G007871	580	2375	0.9478	63.1259
GRMZM2G014136	580	2489	0.9626	60.2346
GRMZM2G084521	580	1433	0.6609	104.622
GRMZM2G181371	580	1445	0.0637	103.754
GRMZM2G145104	579	3715	0.8293	40.2868
GRMZM2G004641	579	3121	0.8212	47.9544
GRMZM5G896731	579	1550	0.4213	96.5584
GRMZM2G027886	578	1965	0.9522	76.0341
GRMZM2G064136	578	680	0.5676	219.716
GRMZM2G079908	578	866	0.6212	172.525
GRMZM2G021816	578	1660	0.8801	90.0042
GRMZM2G178106	578	2430	0.923	61.4844
GRMZM2G087192	576	1571	0.9733	94.7741
GRMZM2G415846	576	2276	0.9943	65.4174
GRMZM2G127308	576	2460	0.9801	60.5244
GRMZM2G079089	575	1409	0.6146	105.487
GRMZM2G041258	575	890	0.9787	167.002
GRMZM2G168706	575	2351	0.9175	63.2206
GRMZM2G042118	574	1393	0.6202	106.513
AC217050.4	574	2667	0.4072	55.633
GRMZM2G104955	574	3485	0.9598	42.5748
GRMZM2G029323	574	1840	0.9016	80.6375
GRMZM2G041050	573	2626	0.9524	56.4031
GRMZM2G005493	573	2126	0.8805	69.6682
GRMZM5G825524	573	2906	0.9222	50.9685
GRMZM2G123122	572	4394	0.8273	33.6495
GRMZM2G146331	572	572	0.8147	258.49
GRMZM2G155954	572	2178	0.8958	67.8862
GRMZM2G073755	572	1652	0.4722	89.5013
GRMZM2G133396	572	2315	0.8959	63.8687
GRMZM2G107984	572	2324	0.8675	63.6214
GRMZM2G036427	572	1293	0.8268	114.351
GRMZM2G004703	572	1069	0.8737	138.313
GRMZM2G359952	572	1520	0.8125	97.2738
GRMZM2G079777	571	1497	0.9385	98.5956
GRMZM2G139977	571	6022	0.9299	24.5097
GRMZM2G149556	570	993	0.6254	148.378
GRMZM2G071015	569	2465	0.7822	59.6676
GRMZM2G031398	569	3585	0.7682	41.0267
GRMZM2G117582	569	1848	0.4589	79.5891
GRMZM2G042101	569	1203	0.8969	122.262
GRMZM2G008356	568	3382	0.9456	43.4128
GRMZM5G870752	568	1178	0.8998	124.637
GRMZM2G406101	568	2952	0.8249	49.7365
AC199541.4	568	1645	0.5234	89.2536
GRMZM2G054136	567	1362	0.7298	107.609
GRMZM2G057535	567	1890	0.955	77.5469
GRMZM2G352159	567	3181	0.9503	46.0747
AC198481.3	567	2736	0.9773	53.5686
GRMZM5G886969	567	1969	0.9126	74.4356
GRMZM2G097116	566	1699	0.2507	86.1125
GRMZM2G012160	566	1711	0.4839	85.5086
GRMZM5G800842	565	835	0.9868	174.906
GRMZM2G363535	565	5101	0.958	28.631
GRMZM2G424053	565	1208	0.7036	120.9
GRMZM2G465833	564	2263	0.8241	64.4225
GRMZM2G162426	564	3685	0.8934	39.5626
GRMZM2G469795	563	4935	0.9755	29.4893
GRMZM2G073114	563	847	0.9858	171.818
GRMZM2G039454	563	3691	0.8737	39.4283
GRMZM2G034025	562	7747	0.8905	18.7519
GRMZM5G851654	562	2808	0.3259	51.7348
GRMZM2G133937	562	5468	0.9283	26.5675
GRMZM2G156320	562	1992	0.9588	72.9273
GRMZM2G066902	562	2110	0.9209	68.8489
GRMZM2G054300	561	2013	0.5872	72.0381
GRMZM2G541193	561	2664	0.9681	54.4342
GRMZM2G004997	560	2388	0.9129	60.6174
GRMZM2G068755	560	6523	0.8697	22.1914
GRMZM2G013890	560	3239	0.8654	44.691
GRMZM2G036916	559	3254	0.9096	44.4056
GRMZM2G181251	559	4007	0.8952	36.0608
AC218972.3	558	2598	0.9319	55.5186
GRMZM2G092451	558	2603	0.9274	55.4119
GRMZM2G464782	557	1828	0.9196	78.763
GRMZM2G176707	557	2125	0.7628	67.7547
GRMZM2G140156	557	3733	0.9539	38.5692
GRMZM2G084717	557	1390	0.9036	103.582
GRMZM2G104373	557	1764	0.8844	81.6206
GRMZM2G143354	556	2108	0.8975	68.1785
GRMZM2G078985	556	1444	0.723	99.5293
GRMZM2G160174	556	1337	0.8915	107.495
GRMZM2G108076	556	1145	0.6035	125.52
GRMZM2G108655	556	4285	0.8847	33.5403
GRMZM2G168149	555	1376	0.8728	104.26
GRMZM5G863596	554	3138	0.8703	45.6352
GRMZM5G850966	554	596	0.9128	240.274
GRMZM2G469111	553	2745	0.9497	52.0746
GRMZM2G171311	553	2027	0.9221	70.5204
GRMZM2G040477	553	1473	0.8255	97.0433
GRMZM2G137839	553	1354	0.7703	105.572
GRMZM2G071059	553	1665	0.8402	85.8527
GRMZM2G075900	553	3569	0.898	40.0518
GRMZM2G176698	553	4892	0.8628	29.2201
GRMZM5G897958	552	2311	0.9338	61.7422
GRMZM2G011483	552	3743	0.8808	38.1208
GRMZM2G090274	552	2020	0.9589	70.6368
GRMZM2G176735	551	3472	0.9539	41.0218
GRMZM2G044143	551	8574	0.8376	16.6116
GRMZM2G081892	551	1983	0.8669	71.8244
GRMZM2G019121	551	2159	0.8754	65.9694
GRMZM2G339336	551	1322	0.8782	107.737
GRMZM2G109130	550	2891	0.9661	49.1765
AC235535.1	550	3342	0.9219	42.5402
GRMZM2G131667	550	2253	0.8771	63.1022
GRMZM2G049347	550	2142	0.9337	66.3722
GRMZM2G147791	550	642	0.7975	221.448
GRMZM2G366392	549	2055	0.8968	69.0564
GRMZM2G119650	549	1801	0.9311	78.7956
GRMZM2G094928	549	1733	0.592	81.8874
GRMZM2G139407	549	1965	0.9522	72.2193
GRMZM2G146267	548	4485	0.8375	31.5836
GRMZM2G100288	548	3368	0.8628	42.0583
GRMZM5G839757	548	1986	0.9648	71.3255
GRMZM2G030463	548	2858	0.9216	49.5635
GRMZM2G009655	548	3548	0.9476	39.9246
GRMZM2G022629	548	1836	0.7353	77.1527
GRMZM2G176028	548	1506	0.8938	94.0587
GRMZM2G091715	547	868	0.72	162.896
GRMZM2G056569	547	1734	0.9129	81.542
GRMZM2G000278	547	1759	0.8783	80.3831
GRMZM2G125728	546	2633	0.9062	53.6025
GRMZM2G126010	546	1784	0.9378	79.1118
GRMZM5G892758	546	2686	0.9069	52.5448
GRMZM2G030167	545	1270	0.8323	110.927
GRMZM2G110509	545	1813	0.6961	77.7037
GRMZM2G146292	545	5169	0.9414	27.2542
GRMZM2G120300	545	1914	0.7456	73.6034
GRMZM2G129238	545	2067	0.9482	68.1552
GRMZM2G073912	544	2612	0.8672	53.8355
GRMZM2G175562	544	1568	0.7991	89.6801
GRMZM2G100146	544	1366	0.8507	102.942
GRMZM2G040296	544	5332	0.8938	26.3725
GRMZM2G005947	544	2167	0.7245	64.8908
GRMZM2G059590	543	4191	0.8647	33.4908
GRMZM2G045090	542	4092	0.9795	34.2379
GRMZM2G324973	542	3300	0.6891	42.455
GRMZM2G117513	541	1398	0.8956	100.031
GRMZM2G358540	541	1321	0.9251	105.861
GRMZM2G167031	541	3671	0.9123	38.094
GRMZM2G474459	541	9064	0.1314	15.4284
GRMZM2G145461	540	1227	0.9291	113.761
GRMZM2G048482	539	2907	0.8875	47.9277
GRMZM2G133919	538	4190	0.6212	33.1903
GRMZM2G130425	538	2467	0.8804	56.3711
GRMZM2G366373	537	1336	0.8735	103.899
GRMZM2G128176	537	6450	0.7705	21.5208
GRMZM2G016447	537	1708	0.8261	81.2699
GRMZM2G063851	537	2313	0.8383	60.0125
GRMZM2G014180	537	2022	0.9451	68.6493
GRMZM2G099630	535	3835	0.9241	36.0605
GRMZM2G092129	535	2044	0.9829	67.6575
GRMZM2G132796	535	2659	0.8548	52.009
GRMZM5G806358	535	5464	0.6678	25.3097
GRMZM2G015869	535	1304	0.9571	106.052
GRMZM2G110572	534	3128	0.8939	44.1284
GRMZM2G124975	534	2033	0.908	67.8965
GRMZM2G003642	534	1162	0.6824	118.79
GRMZM2G066222	533	1234	0.5551	111.649
GRMZM2G075283	533	1265	0.7478	108.913
GRMZM2G063617	533	1031	0.5858	133.632
GRMZM2G457889	533	2609	0.9536	52.8076
GRMZM2G017941	533	1469	0.8325	93.7883
GRMZM2G036034	532	3563	0.7539	38.5957
GRMZM2G119930	532	1935	0.9545	71.068
AC205122.4	532	2481	0.0198	55.4279
GRMZM5G811797	532	2095	0.8329	65.6403
GRMZM2G142863	532	3966	0.8215	34.6739
GRMZM2G033526	532	2643	0.7567	52.0305
GRMZM2G096486	531	1265	0.8498	108.504
GRMZM2G017525	531	1795	0.9159	76.4669
GRMZM2G168858	531	2830	0.8601	48.5011
GRMZM2G057000	531	3182	0.6307	43.1358
GRMZM2G168629	531	4460	0.8592	30.7753
GRMZM2G142984	531	1402	0.9322	97.9016
GRMZM2G038401	530	3100	0.8319	44.1934
GRMZM2G052890	530	1287	0.9744	106.449
GRMZM2G001327	530	2595	0.4173	52.7937
GRMZM2G012566	529	2529	0.4939	54.0692
GRMZM2G166873	529	2900	0.9472	47.1521
GRMZM2G093359	529	1828	0.8687	74.8036
GRMZM2G077253	529	2498	0.9039	54.7402
GRMZM2G174202	528	1846	0.9209	73.9342
GRMZM2G093119	527	4243	0.9121	32.1056
GRMZM2G177828	526	769	0.6983	176.808
GRMZM2G050647	526	3770	0.8347	36.0651
GRMZM2G069758	526	1700	0.8924	79.9798
GRMZM2G102560	526	2508	0.8309	54.2128
GRMZM2G338259	526	3192	0.791	42.5957
GRMZM2G171387	526	1005	0.7692	135.289
GRMZM2G321725	525	2109	0.7112	64.3467
GRMZM2G061447	525	1806	0.8272	75.1424
GRMZM2G044337	525	1815	0.8948	74.7697
AC233895.1	525	1185	0.9806	114.521
GRMZM2G129777	525	1846	0.9198	73.5141
GRMZM2G092296	524	2098	0.4728	64.5608
GRMZM2G439950	524	3536	0.8976	38.3056
GRMZM2G132991	523	4056	0.9073	33.3309
GRMZM2G069676	523	2327	0.9261	58.0963
GRMZM2G315769	523	4267	0.8641	31.6827
GRMZM2G122135	522	2270	0.9225	59.4412
GRMZM2G024484	522	2024	0.9269	66.6658
GRMZM2G321753	521	7094	0.8985	18.9841
GRMZM2G145396	521	1906	0.4827	70.6575
GRMZM2G033521	521	2820	0.9504	47.7564
GRMZM2G157332	521	2068	0.7171	65.1224
GRMZM2G067747	520	2417	0.8109	55.6122
GRMZM2G052667	520	1919	0.8468	70.0441
GRMZM2G179981	520	1451	0.8815	92.6359
GRMZM2G369939	520	2194	0.9562	61.2647
GRMZM2G113156	520	2217	0.9387	60.6291
GRMZM2G154595	519	1648	0.9278	81.4054
GRMZM2G099187	519	2931	0.6479	45.7715
GRMZM2G149843	519	1436	0.8684	93.4235
GRMZM2G089836	519	2608	0.9536	51.4402
GRMZM2G028986	518	968	0.28	138.324
GRMZM2G100242	518	5158	0.9302	25.9592
GRMZM2G022365	518	2453	0.7807	54.5853
GRMZM2G028037	518	2161	0.8889	61.961
GRMZM2G423956	518	2949	0.7494	45.4044
GRMZM2G022632	518	2166	0.7886	61.8179
GRMZM5G855347	518	3395	0.5973	39.4397
GRMZM2G038281	517	3426	0.8196	39.0073
GRMZM2G180659	517	2505	0.6691	53.349
GRMZM2G334628	515	3000	0.4607	44.3741
GRMZM2G144146	514	2282	0.9264	58.2225
GRMZM2G176396	514	1721	0.7757	77.2015
GRMZM2G114675	514	2222	0.8749	59.7946
GRMZM2G083551	514	1638	0.8993	81.1134
GRMZM2G078876	513	1213	0.8714	109.32
GRMZM2G121022	513	2416	0.9073	54.8863
GRMZM2G091088	513	2657	0.9548	49.9079
GRMZM2G080851	513	3350	0.9442	39.5836
GRMZM2G037204	513	2874	0.3911	46.1396
GRMZM2G082529	512	3126	0.9555	42.3374
GRMZM2G178227	512	2042	0.6685	64.8123
GRMZM2G132060	512	2327	0.8771	56.8744
GRMZM2G156800	512	3512	0.7603	37.6841
GRMZM2G118743	512	2454	0.8875	53.931
GRMZM2G092311	512	1216	0.8832	108.838
GRMZM2G415327	512	1697	0.5687	77.9886
GRMZM2G336448	512	2233	0.777	59.2686
GRMZM2G150367	511	1325	0.8423	99.6892
GRMZM2G074314	511	2341	0.8881	56.4239
GRMZM2G175453	511	2531	0.9395	52.1882
AC206259.3	511	3704	0.6471	35.661
GRMZM2G060824	510	4033	0.8433	32.6878
GRMZM2G132373	510	5444	0.9502	24.2156
GRMZM2G350626	510	6624	0.6236	19.9018
GRMZM2G109425	510	2079	0.9548	63.4102
GRMZM5G823855	509	991	0.9415	132.766
GRMZM2G147243	509	2320	0.7909	56.7118
GRMZM2G126361	509	2674	0.9046	49.2039
GRMZM2G105787	509	2176	0.8042	60.4647
GRMZM2G025812	509	1336	0.9611	98.4815
GRMZM2G165987	509	1697	0.6435	77.5317
GRMZM2G077036	508	2455	0.9141	53.4879
GRMZM2G475017	508	2675	0.8434	49.0889
GRMZM2G075140	508	1101	0.9001	119.267
GRMZM2G033130	508	3621	0.7874	36.2642
GRMZM5G824938	508	974	0.9671	134.818
GRMZM2G116126	508	4609	0.9436	28.4905
GRMZM2G447785	507	1226	0.7414	106.896
GRMZM2G052403	506	2637	0.9298	49.6002
GRMZM2G063688	506	3459	0.6467	37.8132
GRMZM2G410991	506	2132	0.6079	61.3489
GRMZM2G138268	506	1812	0.7704	72.1831
GRMZM2G378580	505	3569	0.7876	36.5753
GRMZM2G143651	505	2232	0.6393	58.4845
GRMZM5G817886	505	2117	0.9136	61.6615
AC234152.1	505	2337	0.9127	55.8568
GRMZM2G073567	505	1636	0.9267	79.7905
GRMZM2G006707	505	3054	0.9682	42.7431
AC217271.3	505	1834	0.8353	71.1763
GRMZM2G145905	504	3002	0.9624	43.3973
GRMZM2G026442	504	4043	0.8612	32.2233
GRMZM2G139073	504	1449	0.8875	89.9095
GRMZM2G447632	504	869	0.4534	149.918
GRMZM2G079013	504	3062	0.9533	42.547
GRMZM2G104430	504	1920	0.9021	67.8535
GRMZM2G159032	504	1410	0.8979	92.3963
GRMZM2G336962	503	4693	0.8745	27.7052
GRMZM2G026218	503	4245	0.9084	30.6291
GRMZM2G178822	502	2638	0.9033	49.1895
GRMZM5G830695	502	1942	0.8095	66.8187
GRMZM2G428987	501	2010	0.7109	64.4295
GRMZM2G001898	501	1632	0.7525	79.3525
GRMZM2G011742	501	2643	0.7824	48.9986
GRMZM2G114162	501	6466	0.8531	20.0284
GRMZM2G007151	501	968	0.9339	133.784
GRMZM2G063961	500	1731	0.9133	74.6648
GRMZM2G143211	500	2411	0.7366	53.6063
GRMZM2G330635	500	1406	0.6785	91.9238
GRMZM2G022538	500	1568	0.7921	82.4266
GRMZM2G112240	499	1675	0.8382	77.0068
GRMZM2G013457	499	649	0.9661	198.746
GRMZM2G550865	499	2089	0.8909	61.7455
GRMZM2G368448	499	4559	0.8175	28.2927
AC190609.3	498	2085	0.86	61.74
GRMZM2G132678	498	1662	0.3821	77.4536
GRMZM5G881775	498	2107	0.4504	61.0953
GRMZM2G305027	497	1101	0.8474	116.684
GRMZM2G160428	497	2823	0.9122	45.5081
GRMZM2G119852	496	3615	0.491	35.4664
GRMZM2G103179	496	1421	0.9106	90.2258
GRMZM2G103079	496	5403	0.9265	23.7296
GRMZM5G813206	496	4110	0.8954	31.1949
GRMZM2G034083	496	1782	0.9214	71.9478
GRMZM2G172258	496	2617	0.9377	48.9916
GRMZM2G012628	496	2254	0.7591	56.8815
GRMZM2G085530	495	3503	0.8587	36.5265
GRMZM2G330024	495	5156	0.8753	24.8162
GRMZM2G443985	495	3251	0.7696	39.3579
GRMZM2G078826	495	2914	0.9276	43.9095
GRMZM2G054905	495	3778	0.798	33.8678
GRMZM2G044460	495	1307	0.9426	97.8978
GRMZM2G056572	495	1479	0.7796	86.5128
GRMZM2G018760	495	717	0.7894	178.455
GRMZM2G117755	494	1456	0.8915	87.7019
GRMZM2G051764	494	1886	0.9454	67.7062
GRMZM2G154093	493	1757	0.9567	72.5301
GRMZM2G391042	492	3776	0.8718	33.6803
GRMZM2G066197	492	1202	0.7463	105.804
GRMZM2G131266	492	1534	0.9772	82.9054
GRMZM2G041959	492	2574	0.8699	49.4083
GRMZM2G116557	492	3212	0.9113	39.5943
GRMZM2G006117	492	2503	0.8997	50.8098
GRMZM2G119411	491	3306	0.9471	38.3903
GRMZM2G131907	491	1132	0.8887	112.119
GRMZM2G031360	491	4806	0.5564	26.4083
GRMZM2G066441	491	1838	0.9396	69.0525
GRMZM2G121312	491	1849	0.8875	68.6417
GRMZM2G103937	491	1470	0.8088	86.3391
GRMZM2G019090	491	1187	0.7018	106.924
GRMZM2G162525	491	3635	0.5172	34.9157
GRMZM2G058913	490	3138	0.9245	40.3633
GRMZM2G455075	490	1886	0.956	67.158
GRMZM2G086887	490	2688	0.8382	47.1205
GRMZM2G176029	490	1494	0.8373	84.7791
GRMZM2G062718	490	1776	0.9533	71.3175
GRMZM2G028766	490	3213	0.3713	39.4211
GRMZM2G044457	490	2071	0.8015	61.1588
AC210013.4	489	1890	0.8063	66.8791
GRMZM5G876616	489	1020	0.7255	123.923
GRMZM2G150485	489	1942	0.7673	65.0883
GRMZM2G128914	489	2253	0.8442	56.1036
GRMZM2G104118	489	2105	0.8713	60.0482
GRMZM2G118355	489	1120	0.6545	112.858
GRMZM2G054221	489	1769	0.8898	71.4536
GRMZM2G123446	489	2021	0.8832	62.544
GRMZM2G351387	488	2254	0.9255	55.9641
GRMZM2G078143	488	1948	0.903	64.7551
GRMZM2G102421	487	1529	0.828	82.3313
GRMZM2G160237	487	2146	0.7819	58.6601
GRMZM2G081812	487	1699	0.9341	74.0933
GRMZM2G134385	487	2782	0.9497	45.2496
GRMZM2G540403	487	1654	0.8767	76.1091
GRMZM2G071441	487	3471	0.8594	36.2675
GRMZM2G073622	487	1038	0.7861	121.276
GRMZM2G107289	487	1648	0.8871	76.3862
GRMZM2G088524	487	1440	0.6785	87.4198
GRMZM2G426802	486	3594	0.7841	34.9544
GRMZM2G331032	486	2011	0.9244	62.4694
GRMZM5G840560	486	2306	0.9662	54.4779
GRMZM2G173636	486	1619	0.9302	77.5948
GRMZM2G056870	485	1810	0.5862	69.2638
GRMZM2G030744	485	2316	0.7949	54.131
GRMZM2G151193	485	1785	0.8594	70.2339
GRMZM2G162968	484	3407	0.9254	36.7212
GRMZM2G017421	484	3218	0.9636	38.8779
GRMZM2G083459	484	1995	0.8466	62.7113
GRMZM2G063792	483	2267	0.8937	55.073
GRMZM2G150906	483	2859	0.9489	43.6693
GRMZM2G081188	483	2491	0.8579	50.1206
GRMZM2G176677	483	2495	0.7932	50.0403
GRMZM2G060357	483	1379	0.8521	90.537
GRMZM2G434696	483	3582	0.928	34.855
GRMZM2G467007	483	2721	0.7038	45.8841
GRMZM2G074053	482	2029	0.8916	61.4056
GRMZM2G177263	482	1661	0.7784	75.0103
GRMZM2G153792	482	4527	0.9282	27.522
GRMZM2G074567	481	1820	0.7566	68.3151
GRMZM2G328094	481	1576	0.816	78.8918
GRMZM2G087245	480	1088	0.8925	114.04
GRMZM2G119256	480	1451	0.8656	85.51
GRMZM2G011590	480	2056	0.9805	60.3478
GRMZM2G100225	479	1259	0.8014	98.3452
GRMZM2G029258	479	3926	0.8961	31.5376
GRMZM2G056501	479	1575	0.6025	78.6137
GRMZM2G322024	479	5538	0.9294	22.3576
GRMZM2G152877	478	2942	0.9691	41.998
GRMZM2G410479	478	5510	0.877	22.4243
GRMZM5G846196	478	1461	0.7536	84.5709
GRMZM2G056145	478	3554	0.9457	34.7659
GRMZM2G131943	477	2532	0.8693	48.6965
GRMZM2G163998	477	1183	0.7625	104.226
GRMZM2G027282	477	1776	0.6667	69.4254
GRMZM2G074436	476	1815	0.8942	67.7912
GRMZM2G004377	476	2532	0.812	48.5944
AC233910.1	476	2253	0.0493	54.6121
GRMZM2G111642	476	4188	0.8539	29.3794
GRMZM2G104025	476	1394	0.7475	88.2648
GRMZM2G070323	475	3627	0.8462	33.8524
GRMZM2G036464	475	1629	0.9104	75.373
GRMZM2G115456	475	2458	0.7746	49.9522
GRMZM5G835704	475	1198	0.9224	102.49
GRMZM2G029029	474	1575	0.8362	77.7931
GRMZM2G136769	474	2203	0.9396	55.6169
GRMZM2G147145	474	2412	0.7483	50.7977
GRMZM2G081462	473	2113	0.7047	57.8635
GRMZM2G055936	473	866	0.8303	141.184
GRMZM2G180335	473	3071	0.873	39.813
GRMZM2G147856	473	2942	0.7617	41.5587
GRMZM2G055141	473	1360	0.8691	89.9012
GRMZM2G118462	473	3644	0.8592	33.5526
GRMZM2G011101	472	3347	0.9083	36.4527
GRMZM2G180732	472	2813	0.8973	43.3726
GRMZM2G150295	472	1849	0.5998	65.9855
GRMZM2G012416	472	1960	0.9138	62.2485
GRMZM2G101938	472	1262	0.8867	96.6776
GRMZM2G015238	472	2653	0.9431	45.9884
GRMZM2G149281	472	2058	0.6531	59.2843
GRMZM2G155329	471	1266	0.8096	96.168
GRMZM2G134020	471	1112	0.9496	109.486
GRMZM2G553314	471	2542	0.9709	47.8948
GRMZM5G862540	471	1975	0.9625	61.6449
GRMZM2G114702	471	1730	0.7873	70.3749
GRMZM2G031308	470	1430	0.8224	84.9582
GRMZM2G173967	470	1883	0.9033	64.5195
GRMZM2G075676	469	1957	0.8947	61.9477
GRMZM2G102745	469	1956	0.8686	61.9794
AC233893.1	469	2349	0.252	51.6099
GRMZM2G075624	469	960	0.7281	126.283
GRMZM5G846198	468	1894	0.9176	63.8718
GRMZM2G389768	468	1715	0.5773	70.5383
GRMZM2G359234	468	2876	0.6492	42.063
GRMZM2G006953	468	971	0.5376	124.586
GRMZM2G135027	468	1882	0.899	64.2791
GRMZM2G121303	468	1556	0.7969	77.7463
GRMZM2G103345	467	2775	0.7506	43.5008
GRMZM2G155357	467	2048	0.9849	58.9427
GRMZM2G009464	467	2224	0.8741	54.2782
GRMZM2G136296	467	4026	0.7325	29.9838
GRMZM2G022061	467	2476	0.912	48.7539
GRMZM2G460396	467	4396	0.7743	27.4601
GRMZM2G152421	466	2024	0.8246	59.5139
GRMZM2G032049	466	3194	0.8835	37.7133
GRMZM2G109472	466	4100	0.7315	29.3796
GRMZM2G057450	465	2114	0.8846	56.858
GRMZM2G143328	465	908	0.9945	132.376
GRMZM2G324886	465	1085	0.9143	110.781
GRMZM2G117870	464	3838	0.8674	31.2504
GRMZM2G041275	464	2276	0.9187	52.6974
GRMZM2G173354	464	1713	0.8967	70.0171
GRMZM2G021483	464	4691	0.8299	25.5679
GRMZM2G365035	463	2003	0.9471	59.7507
GRMZM2G003385	463	2321	0.7669	51.5643
GRMZM2G048243	463	3915	0.9436	30.5698
GRMZM2G080274	463	1108	0.7771	108.015
GRMZM2G171688	462	2574	0.8761	46.3956
GRMZM2G004057	462	2592	0.8198	46.0734
GRMZM2G130440	462	1915	0.9739	62.3615
GRMZM2G047476	462	1693	0.3946	70.5388
GRMZM2G134708	461	1996	0.8332	59.7013
GRMZM2G064163	461	1741	0.8162	68.4456
GRMZM2G347583	461	4955	0.9391	24.0492
GRMZM2G164141	460	1553	0.848	76.5649
GRMZM2G122943	460	1608	0.7718	73.9461
GRMZM2G161913	460	4021	0.8856	29.5711
GRMZM2G109821	459	3109	0.3792	38.1624
GRMZM2G069061	459	1166	0.8696	101.755
GRMZM2G702490	459	2195	0.8938	54.0532
GRMZM5G838403	459	2482	0.8618	47.8029
AC207342.3	459	1029	0.9922	115.303
GRMZM2G114751	459	2056	0.7446	57.7076
GRMZM2G142757	459	1336	0.9813	88.8075
GRMZM2G100511	459	2349	0.8489	50.5095
GRMZM2G087206	459	1500	0.896	79.0979
GRMZM2G052875	458	2408	0.9456	49.1646
GRMZM2G162290	458	3150	0.847	37.5836
GRMZM2G022777	458	2505	0.6974	47.2608
GRMZM2G099481	458	3628	0.9446	32.6318
GRMZM2G118344	458	4779	0.8847	24.7726
GRMZM2G433801	458	7364	0.7823	16.0766
GRMZM2G027862	458	1374	0.7766	86.1632
GRMZM2G070054	457	2183	0.9464	54.1135
GRMZM2G093441	457	2063	0.8997	57.2612
GRMZM2G058039	457	2324	0.864	50.8304
GRMZM2G066650	457	3856	0.9098	30.6353
GRMZM2G302604	457	2045	0.9345	57.7652
GRMZM2G069009	457	2360	0.9254	50.055
GRMZM2G002959	456	1864	0.9034	63.2357
GRMZM2G143046	456	1315	0.9574	89.636
GRMZM5G810275	456	1744	0.9731	67.5868
GRMZM2G006468	456	2844	0.7331	41.4456
GRMZM2G342105	456	2526	0.7494	46.6632
GRMZM2G028700	455	4075	0.9139	28.862
GRMZM2G026459	455	2653	0.827	44.332
GRMZM2G114513	455	2399	0.8641	49.0258
GRMZM2G410393	455	6466	0.6861	18.1894
GRMZM2G469162	455	4107	0.9216	28.6372
GRMZM2G319445	455	1726	0.8094	68.1418
GRMZM2G020187	455	2246	0.8838	52.3655
GRMZM2G038598	455	1811	0.8432	64.9436
GRMZM2G001676	454	2055	0.9645	57.1067
GRMZM2G444808	454	4342	0.6651	27.0277
GRMZM2G396114	454	3047	0.9048	38.5147
GRMZM2G023242	453	970	0.9237	120.717
GRMZM2G025860	453	4070	0.8985	28.7705
GRMZM2G073934	453	2084	0.8532	56.188
GRMZM2G481843	453	1768	0.7817	66.2307
GRMZM2G150160	452	1744	0.9025	66.9939
GRMZM2G122750	452	5799	0.9039	20.1478
GRMZM2G017586	452	1321	0.8751	88.4461
GRMZM5G827286	451	2789	0.9477	41.7995
GRMZM2G385287	451	1387	0.5624	84.0511
GRMZM2G110185	451	1844	0.8796	63.2206
GRMZM2G095921	451	3253	0.878	35.8373
GRMZM2G152686	451	2231	0.922	52.2541
GRMZM2G067176	450	2377	0.8793	48.9358
GRMZM2G152438	450	1894	0.7445	61.4152
GRMZM5G895175	450	3548	0.9109	32.7848
GRMZM2G382413	450	2247	0.9688	51.767
GRMZM5G813111	450	1625	0.9182	71.5818
GRMZM5G856297	450	1568	0.6001	74.1839
AC152495.1	449	4860	0.0163	23.881
GRMZM2G038126	449	2257	0.8254	51.4231
GRMZM2G032252	449	2592	0.8985	44.777
GRMZM2G132303	449	1915	0.7305	60.6067
GRMZM2G458494	449	2016	0.9549	57.5704
GRMZM2G066578	448	2489	0.92	46.5261
GRMZM2G144153	448	1250	0.6608	92.6427
GRMZM2G126865	448	2598	0.6636	44.5741
GRMZM2G138976	448	1422	0.9705	81.437
GRMZM2G176209	448	2100	0.8657	55.1445
GRMZM2G164821	448	2347	0.9378	49.341
GRMZM2G045241	448	2155	0.9754	53.7371
GRMZM2G030805	448	3734	0.8931	31.0132
AC234158.1	448	4926	0.808	23.5086
GRMZM2G049141	447	6055	0.8712	19.0826
GRMZM2G145280	447	1036	0.8359	111.53
GRMZM2G077780	447	3477	0.8516	33.2312
GRMZM2G068212	447	2654	0.9393	43.5361
GRMZM2G369912	447	2918	0.6912	39.5973
GRMZM2G432796	447	3458	0.7637	33.4138
GRMZM2G053273	447	2005	0.8464	57.6284
GRMZM2G350447	447	5927	0.8745	19.4947
GRMZM2G078832	445	2525	0.9315	45.5556
GRMZM2G402002	445	3537	0.9508	32.5213
GRMZM2G059825	445	1852	0.9233	62.1101
GRMZM2G007025	445	1355	0.9697	84.8915
GRMZM2G151536	444	2469	0.8748	46.4842
GRMZM2G152663	444	2688	0.9271	42.697
GRMZM2G124532	444	4147	0.8932	27.6753
GRMZM2G032496	444	2550	0.9176	45.0076
GRMZM2G016827	444	1333	0.8455	86.0986
GRMZM2G041175	443	1343	0.8987	85.265
GRMZM2G125411	443	2532	0.859	45.2255
GRMZM2G016894	443	2357	0.8579	48.5833
GRMZM2G028929	443	1571	0.7174	72.8905
GRMZM2G409104	443	3042	0.7505	37.6433
GRMZM5G899800	442	1509	0.8516	75.714
GRMZM2G166659	442	1831	0.4986	62.3989
GRMZM2G046924	441	1861	0.6529	61.2541
GRMZM2G066867	441	2056	0.8497	55.4445
GRMZM2G429241	441	4994	0.9289	22.8262
GRMZM2G033931	441	3814	0.9156	29.8883
GRMZM2G090226	441	1522	0.6905	74.8975
GRMZM2G393334	440	2871	0.7144	39.6153
GRMZM2G120652	440	1720	0.7314	66.1253
GRMZM5G892645	440	2111	0.8816	53.8775
GRMZM2G031825	440	1994	0.662	57.0389
GRMZM2G040247	440	3517	0.7882	32.3388
GRMZM2G033805	440	3211	0.9041	35.4206
GRMZM2G122231	439	3123	0.7906	36.3359
GRMZM2G028516	439	1799	0.9083	63.0778
GRMZM2G431156	439	938	0.9904	120.978
GRMZM5G827171	439	2221	0.8352	51.0927
GRMZM2G142072	439	3375	0.9265	33.6228
GRMZM2G049839	439	1571	0.9332	72.2323
GRMZM2G132000	438	1026	0.654	110.349
GRMZM2G437119	438	2247	0.8247	50.3865
GRMZM2G128214	438	2235	0.8282	50.657
AC235541.1	438	3009	0.9395	37.6266
GRMZM2G006297	438	3023	0.9765	37.4524
GRMZM2G107609	437	1741	0.8593	64.8823
GRMZM2G022313	437	2347	0.9655	48.1295
GRMZM2G021194	437	2978	0.8522	37.9315
GRMZM2G574782	437	1985	0.863	56.9068
GRMZM2G054050	437	2361	0.9449	47.8441
GRMZM2G096070	437	2623	0.7892	43.0652
GRMZM2G000923	437	1093	0.9067	103.349
GRMZM2G016189	437	1636	0.926	69.0465
GRMZM2G145709	436	2402	0.8347	46.9199
GRMZM2G165511	436	1598	0.4869	70.5266
GRMZM2G132358	436	1449	0.8813	77.7788
GRMZM2G074589	436	2247	0.9524	50.1564
GRMZM2G493395	436	2749	0.9578	40.9973
GRMZM2G015784	436	1768	0.5498	63.7452
GRMZM2G034575	435	3087	0.9223	36.4247
GRMZM2G172101	435	4279	0.7097	26.2779
GRMZM2G025024	435	2872	0.9735	39.1515
GRMZM2G024354	435	1022	0.865	110.023
GRMZM2G000114	435	2905	0.9164	38.7067
GRMZM2G091119	434	2331	0.8683	48.1272
GRMZM2G121360	434	1943	0.7674	57.7378
GRMZM2G093065	434	2621	0.9046	42.8022
GRMZM2G145063	434	2958	0.8266	37.9258
GRMZM2G153274	434	3797	0.5834	29.5456
GRMZM2G039588	434	1574	0.8577	71.2735
GRMZM2G021427	434	1416	0.7175	79.2264
GRMZM2G071589	433	2557	0.9108	43.7724
GRMZM2G429118	433	2115	0.8908	52.9201
GRMZM2G169458	433	1925	0.8031	58.1434
GRMZM2G130868	433	2188	0.8428	51.1545
AC185226.4	433	2790	0.9061	40.1169
GRMZM2G344967	432	6776	0.862	16.4799
GRMZM2G348909	431	2962	0.9554	37.6128
GRMZM2G018941	431	916	0.9148	121.626
GRMZM2G018356	431	3397	0.9535	32.7963
GRMZM2G092468	431	1250	0.9264	89.1273
GRMZM2G013461	431	1287	0.7584	86.5649
GRMZM2G096343	431	2196	0.9554	50.7327
GRMZM2G027741	431	1846	0.9215	60.3516
GRMZM2G006042	431	3202	0.93	34.7936
GRMZM2G128206	430	1291	0.914	86.0965
GRMZM2G164956	430	3725	0.6266	29.8391
GRMZM2G464754	430	7329	0.7638	15.1659
GRMZM2G048277	430	1999	0.905	55.6031
GRMZM2G159369	429	1798	0.7659	61.6752
GRMZM2G117935	429	1219	0.8769	90.9697
GRMZM2G084812	429	1317	0.956	84.2005
GRMZM5G836378	428	1727	0.8246	64.0611
GRMZM2G062357	428	2710	0.8288	40.8242
GRMZM2G128971	428	2104	0.6863	52.5825
GRMZM2G060564	428	1650	0.7933	67.0507
GRMZM2G036837	428	2158	0.8823	51.2667
GRMZM2G024808	428	2179	0.9096	50.7726
GRMZM2G027932	428	5422	0.8713	20.4046
GRMZM5G817255	428	2442	0.4333	45.3045
GRMZM2G080940	427	2142	0.8534	51.529
GRMZM2G018126	427	2404	0.9455	45.9131
GRMZM2G418515	427	5385	0.8455	20.4968
GRMZM2G464000	427	2968	0.9003	37.1884
GRMZM2G074687	427	1711	0.9182	64.5091
GRMZM2G165817	427	1685	0.9074	65.5045
GRMZM2G145133	427	1570	0.8503	70.3026
GRMZM2G333875	426	2253	0.806	48.8756
GRMZM2G092327	426	2650	0.8155	41.5534
GRMZM2G455828	426	1795	0.4212	61.3463
GRMZM2G124313	426	1723	0.6976	63.9098
GRMZM2G008611	426	1452	0.4725	75.8379
GRMZM2G145360	426	4083	0.8913	26.9695
GRMZM2G075333	426	2235	0.9275	49.2692
GRMZM2G070138	426	2460	0.9447	44.7629
GRMZM2G091258	426	3657	0.88	30.1112
GRMZM2G107362	425	1790	0.8804	61.3733
GRMZM2G156251	425	2336	0.8669	47.0283
GRMZM2G015291	425	2863	0.9095	38.3717
GRMZM2G106600	425	2427	0.9609	45.265
GRMZM2G017624	425	2764	0.9396	39.7461
GRMZM2G135970	425	1653	0.8506	66.4598
GRMZM2G137528	425	1863	0.9249	58.9684
GRMZM2G077541	424	1767	0.85	62.0258
GRMZM2G054559	424	3274	0.8784	33.4758
GRMZM2G177659	424	2126	0.9436	51.552
GRMZM2G158766	424	847	0.8135	129.397
GRMZM2G063882	424	1827	0.1992	59.9889
GRMZM2G146589	424	2585	0.9253	42.3983
GRMZM2G144346	424	1924	0.7879	56.9645
GRMZM2G326707	424	2199	0.7785	49.8407
GRMZM2G470740	424	2431	0.9424	45.0842
GRMZM2G078292	423	2359	0.8817	46.3506
GRMZM2G156756	423	3573	0.8914	30.6021
GRMZM2G131087	423	1210	0.9298	90.3646
AC214448.3	423	1353	0.9926	80.8139
GRMZM2G058305	423	2479	0.6656	44.107
GRMZM2G082330	423	2147	0.2864	50.9274
GRMZM2G049895	423	2370	0.7684	46.1355
GRMZM2G063394	423	3272	0.9447	33.4172
GRMZM2G004183	423	1938	0.8287	56.4196
GRMZM2G345725	422	3182	0.939	34.2812
GRMZM2G087233	422	1380	0.7297	79.0454
GRMZM2G164743	421	2361	0.8789	46.0924
GRMZM2G126691	421	3847	0.8659	28.2881
GRMZM2G164018	421	2866	0.9201	37.9707
GRMZM2G104958	421	3675	0.9687	29.612
AC195154.3	421	3546	0.7428	30.6893
GRMZM2G175272	421	1271	0.9017	85.6209
GRMZM2G047431	420	1782	0.9585	60.9235
AC192451.3	420	1218	0.8883	89.1344
GRMZM2G143625	420	1525	0.977	71.1906
GRMZM2G144403	419	2935	0.8184	36.9019
GRMZM2G111533	419	1470	0.7279	73.6784
GRMZM2G416308	419	2507	0.848	43.2019
GRMZM2G091302	419	1844	0.8579	58.7349
GRMZM2G020148	418	1289	0.7983	83.8237
AC212068.4	418	1152	0.8438	93.7923
GRMZM2G064374	418	2200	0.9068	49.113
GRMZM2G064390	418	2267	0.8394	47.6615
GRMZM2G086030	418	5637	0.7227	19.1678
GRMZM2G017805	417	2460	0.8764	43.8172
GRMZM2G450125	417	2863	0.7426	37.6494
GRMZM2G174738	417	1915	0.9295	56.2873
GRMZM2G012453	417	3782	0.867	28.5008
GRMZM2G145101	417	2510	0.5494	42.9443
GRMZM2G474658	417	4116	0.8134	26.1881
GRMZM2G167856	417	1773	0.8607	60.7954
GRMZM2G035465	417	1712	0.9515	62.9616
GRMZM2G126821	416	2042	0.7566	52.66
GRMZM2G113928	416	2394	0.8321	44.9172
GRMZM2G003692	416	1946	0.8392	55.2578
GRMZM2G157019	416	1319	0.7604	81.5252
GRMZM2G049091	415	1296	0.8935	82.7726
GRMZM2G179301	415	1901	0.6418	56.4299
GRMZM2G017013	415	2415	0.7644	44.4196
GRMZM2G042889	414	5117	0.8585	20.9136
GRMZM2G163277	414	5544	0.8898	19.3028
GRMZM2G464401	414	2099	0.7923	50.9837
GRMZM2G414496	414	3057	0.665	35.0065
GRMZM2G305046	414	997	0.6941	107.337
GRMZM2G147046	414	1036	0.8649	103.296
GRMZM2G010406	414	1912	0.8802	55.9701
GRMZM2G140500	414	4873	0.9187	21.9608
GRMZM2G095562	414	2410	0.8763	44.4045
GRMZM5G860761	413	900	0.8378	118.618
GRMZM2G151387	413	2964	0.8995	36.0176
GRMZM5G852338	413	1624	0.6933	65.7366
AC208204.3	413	477	0.4046	223.808
GRMZM2G014833	413	2062	0.8948	51.7732
GRMZM2G055992	413	3071	0.8763	34.7627
GRMZM2G008410	413	1900	0.8137	56.1875
GRMZM2G123519	413	1879	0.9516	56.8155
GRMZM2G001272	412	2172	0.8628	49.0321
GRMZM2G035017	412	1469	0.612	72.4968
GRMZM2G087625	412	2158	0.9532	49.3502
GRMZM2G140150	412	1822	0.8348	58.451
GRMZM2G027392	412	783	0.8531	136.012
GRMZM2G476637	412	2767	0.8522	38.4885
GRMZM2G113950	411	2702	0.9419	39.3188
GRMZM2G078360	411	5060	0.7478	20.9959
GRMZM2G007675	411	2312	0.9407	45.9512
GRMZM2G101515	411	3080	0.925	34.4933
GRMZM5G875502	411	3131	0.9288	33.9314
GRMZM2G171520	411	2340	0.744	45.4014
GRMZM2G331902	411	1981	0.8849	53.6291
GRMZM2G012690	411	1725	0.9293	61.588
GRMZM2G131443	411	3988	0.8445	26.6397
GRMZM2G151916	410	1926	0.9258	55.0264
GRMZM2G461586	410	1052	0.9572	100.742
GRMZM2G011078	410	1975	0.8582	53.6612
GRMZM2G105398	410	1883	0.8996	56.2829
GRMZM2G094595	410	1636	0.7463	64.7804
GRMZM2G142640	410	861	0.7491	123.09
GRMZM2G102845	409	4127	0.8711	25.6172
GRMZM2G058289	409	2640	0.842	40.0463
GRMZM2G321767	409	4286	0.6857	24.6669
AC155622.2	409	1194	0.9841	88.5446
GRMZM2G070562	409	2205	0.9002	47.9466
AC226230.2	409	4027	0.9248	26.2534
GRMZM2G056103	409	3697	0.9402	28.5968
GRMZM2G109743	409	1519	0.7169	69.5999
GRMZM2G389118	408	4259	0.8983	24.7626
GRMZM2G021069	408	3028	0.9082	34.8295
GRMZM2G329885	408	3211	0.7889	32.8445
GRMZM2G127632	407	3214	0.9347	32.7335
GRMZM2G118363	407	2227	0.9502	47.2408
GRMZM2G103945	407	1462	0.9152	71.9599
GRMZM2G081652	407	2425	0.8355	43.3836
GRMZM2G103137	407	2249	0.8484	46.7787
GRMZM2G017187	407	2579	0.9678	40.7931
GRMZM2G178415	407	2657	0.49	39.5955
GRMZM2G091632	406	2967	0.9336	35.3714
GRMZM2G170128	406	2340	0.765	44.8491
GRMZM2G029077	406	2963	0.9403	35.4191
GRMZM2G064594	405	1822	0.8875	57.4579
AC149829.2	405	3075	0.759	34.045
GRMZM2G178618	405	3115	0.8986	33.6078
GRMZM2G139822	405	1876	0.9643	55.804
GRMZM2G107696	405	3900	0.6421	26.8432
GRMZM2G170843	405	2363	0.9255	44.3031
GRMZM2G140832	405	2261	0.9536	46.3018
GRMZM2G703490	404	1462	0.9213	71.4294
GRMZM2G001639	404	1843	0.9007	56.663
GRMZM2G414848	404	953	0.9297	109.58
GRMZM2G110681	404	1374	0.9731	76.0043
GRMZM5G820122	404	3366	0.8583	31.0249
GRMZM2G108463	404	1936	0.8404	53.941
GRMZM2G104199	404	2331	0.8893	44.8004
GRMZM2G069410	404	1621	0.9278	64.4231
GRMZM2G150406	403	2176	0.9513	47.8729
GRMZM2G044132	403	1451	0.0358	71.7928
GRMZM5G859592	403	1072	0.8666	97.1748
GRMZM2G002391	403	1629	0.9325	63.948
GRMZM2G033117	403	1593	0.6792	65.3932
GRMZM2G022088	403	1442	0.9334	72.2409
GRMZM2G146161	403	2285	0.9501	45.5892
GRMZM2G179976	402	1787	0.7627	58.1493
GRMZM2G149768	402	2283	0.3653	45.5159
GRMZM2G053916	402	2143	0.6724	48.4894
GRMZM2G031004	402	2162	0.8848	48.0633
GRMZM2G054162	402	4060	0.883	25.5943
GRMZM2G050553	401	1866	0.9845	55.549
GRMZM2G342327	401	2779	0.9061	37.2992
GRMZM2G164562	401	1671	0.9761	62.0313
GRMZM2G139894	401	3445	0.9129	30.0884
GRMZM2G125531	401	1950	0.8523	53.1561
AC233870.1	401	1944	0.9053	53.3202
GRMZM2G155321	401	2270	0.7837	45.6627
GRMZM2G079196	400	1679	0.9619	61.5818
GRMZM2G009936	400	1048	0.6069	98.6602
GRMZM2G463032	400	4419	0.5393	23.398
GRMZM2G316113	400	4409	0.3692	23.4511
GRMZM2G424832	400	4055	0.7628	25.4984
GRMZM2G348512	399	1636	0.6143	63.0424
GRMZM5G802392	398	920	0.8946	111.825
GRMZM2G038284	398	2042	0.6562	50.3814
GRMZM5G824600	398	1867	0.6904	55.1039
GRMZM2G144372	398	1663	0.9844	61.8634
GRMZM2G481755	398	1881	0.8868	54.6937
GRMZM2G077208	397	1270	0.4693	80.8035
GRMZM2G103230	397	3767	0.914	27.2419
GRMZM2G119175	397	2149	0.8423	47.7526
GRMZM2G162788	397	789	0.9468	130.064
GRMZM2G174136	397	1911	0.8095	53.6999
GRMZM2G048775	397	1723	0.8566	59.5591
GRMZM2G171604	396	1808	0.9425	56.6161
GRMZM2G161611	396	1758	0.8777	58.2264
GRMZM2G145578	396	1324	0.8671	77.3126
GRMZM2G161154	396	837	0.7384	122.296
GRMZM2G079031	396	3746	0.8027	27.3257
GRMZM2G169033	396	2420	0.9285	42.2983
GRMZM2G054821	396	3397	0.8555	30.133
GRMZM2G369839	396	924	0.7175	110.781
GRMZM5G892675	396	4335	0.7772	23.6129
GRMZM2G038375	396	1278	0.8372	80.0954
GRMZM2G048012	396	2479	0.9302	41.2916
GRMZM2G047774	396	2313	0.9732	44.255
GRMZM2G401050	396	3148	0.8313	32.5165
GRMZM2G070047	396	1605	0.5614	63.7769
GRMZM2G160556	395	2420	0.95	42.1915
GRMZM2G135283	395	2224	0.8192	45.9098
[truncated: 21,152 more rows]

## Sheet: 2C
	Genes expressed in 20MAP
GeneID	Uniq_reads_num	Length	Coverage	RPKM
GRMZM2G168651	71584	1607	0.8606	9049.95
GRMZM2G158394	27411	1432	0.7528	3888.91
GRMZM2G136910	26744	1250	0.7008	4346.73
GRMZM2G153292	26328	1889	0.9566	2831.6
GRMZM2G101958	19613	1057	0.7029	3769.77
GRMZM2G010868	19199	1704	0.4613	2289.05
GRMZM2G006937	17933	2794	0.8865	1303.99
GRMZM2G080603	17003	1547	0.6374	2232.96
GRMZM2G063162	13299	4493	0.7098	601.352
GRMZM2G402631	11255	978	0.9796	2338.05
GRMZM2G445602	10883	2435	0.9766	908.021
GRMZM2G009479	10818	3118	0.9634	704.883
GRMZM2G079348	10677	2788	0.5312	778.042
GRMZM2G112968	9953	1384	0.8584	1461.05
GRMZM2G164229	9351	1778	0.4229	1068.5
GRMZM2G053206	8521	1372	0.9431	1261.78
GRMZM2G117198	7706	1633	0.9816	958.714
GRMZM2G075255	7231	2491	0.9318	589.754
GRMZM2G154397	7131	2526	0.7965	573.54
GRMZM2G340251	7092	2648	0.852	544.123
GRMZM2G074604	7055	2783	0.8656	515.027
GRMZM2G308860	6924	2366	0.9962	594.55
GRMZM2G123029	6815	2021	0.9332	685.087
GRMZM2G450233	6415	2213	0.7185	588.927
GRMZM2G024668	6347	2550	0.9765	505.679
GRMZM2G116273	6300	1337	0.7046	957.316
GRMZM2G122276	6135	761	0.9961	1637.86
GRMZM2G060583	6085	4213	0.9786	293.437
GRMZM2G180625	6075	2060	0.5932	599.136
GRMZM2G419891	5984	1976	0.9742	615.249
AC207722.2	5896	1166	0.8748	1027.32
GRMZM2G159285	5803	1503	0.9561	784.404
GRMZM5G841015	5711	3884	0.9858	298.73
GRMZM2G056252	5666	1961	0.9454	587.01
GRMZM2G457003	5342	3018	0.9357	359.609
GRMZM2G031790	5275	1935	0.9566	553.844
GRMZM2G700208	5224	1173	0.9991	904.798
GRMZM2G092474	5193	1133	0.8623	931.182
GRMZM2G310431	5168	2581	0.8334	406.8
GRMZM2G005633	5094	1591	0.7913	650.482
GRMZM2G071154	5077	2103	0.9401	490.472
GRMZM2G117989	5026	1320	0.6652	773.562
GRMZM2G067985	4976	2685	0.6078	376.515
GRMZM2G080530	4888	2562	0.961	387.613
GRMZM2G118003	4778	2170	0.9212	447.335
AC195340.3	4733	3444	0.2059	279.203
GRMZM2G409726	4612	2382	0.8014	393.363
GRMZM2G051943	4606	1246	0.9454	751.021
GRMZM2G152466	4577	2297	0.8167	404.824
GRMZM2G139874	4506	2010	0.9483	455.451
GRMZM2G343543	4477	1886	0.9141	482.272
GRMZM2G478920	4473	3706	0.8408	245.211
GRMZM2G153541	4453	1961	0.8593	461.34
GRMZM2G177812	4447	2688	0.9788	336.112
GRMZM2G083526	4401	2569	0.9763	348.044
GRMZM2G144387	4370	1127	0.8731	787.778
GRMZM2G104325	4367	3579	0.8117	247.895
GRMZM2G012631	4349	2668	0.9648	331.169
GRMZM2G166159	4301	2989	0.8789	292.341
GRMZM2G032003	4280	2560	0.8133	339.664
GRMZM2G107839	4275	1094	0.6124	793.899
GRMZM2G146308	4266	901	0.9301	961.928
GRMZM2G020801	4244	3273	0.9636	263.436
GRMZM2G034985	4207	3349	0.9179	255.214
GRMZM2G047055	4146	2227	0.7539	378.229
GRMZM5G851266	4143	2172	0.9945	387.527
GRMZM2G102829	4044	2673	0.8908	307.368
GRMZM2G069651	4026	2688	0.9788	304.292
GRMZM2G327595	4021	2335	0.7576	349.859
GRMZM2G159397	3969	1730	0.8803	466.102
GRMZM2G177631	3934	4406	0.8568	181.4
GRMZM2G416388	3919	1788	0.769	445.301
GRMZM2G083725	3872	1424	0.7704	552.423
GRMZM2G096585	3867	2301	0.884	341.432
GRMZM2G162461	3744	2324	0.9225	327.3
GRMZM2G064302	3736	2022	0.9441	375.381
GRMZM2G142584	3649	2508	0.8872	295.592
GRMZM2G112165	3639	2919	0.8157	253.276
GRMZM2G129064	3626	2275	0.8879	323.812
AC209208.3	3623	2967	0.6593	248.083
GRMZM2G092447	3594	3582	0.8361	203.844
GRMZM2G700188	3553	2274	0.7713	317.432
GRMZM2G046804	3547	1963	0.7478	367.102
GRMZM2G061969	3521	3144	0.9876	227.525
GRMZM2G113137	3475	4126	0.9937	171.109
GRMZM2G009136	3455	1864	0.8256	376.572
GRMZM2G137329	3454	724	0.982	969.237
GRMZM5G855672	3448	1185	0.9764	591.147
GRMZM2G029048	3386	2610	0.9238	263.568
GRMZM2G390896	3341	1905	0.9811	356.31
GRMZM2G061135	3311	1715	0.9015	392.23
GRMZM2G467799	3285	8676	0.9682	76.924
GRMZM2G382914	3268	1985	0.8519	334.478
GRMZM2G104400	3262	2626	0.9326	252.369
GRMZM2G105996	3228	1162	0.9475	564.383
GRMZM2G085078	3213	7057	0.9055	92.499
GRMZM2G036217	3152	2339	0.953	273.78
GRMZM2G056039	3135	2498	0.9207	254.971
GRMZM2G124317	3132	1218	0.8407	522.421
GRMZM2G331368	3118	11519	0.9747	54.993
GRMZM2G085924	3105	1509	0.9689	418.041
GRMZM2G015419	3078	3098	0.9926	201.852
GRMZM2G149751	3068	3753	0.5105	166.082
GRMZM2G107101	3063	4571	0.9482	136.139
GRMZM2G044947	3062	1925	0.9034	323.162
GRMZM2G110735	3050	2808	0.8636	220.673
GRMZM2G326111	3042	1210	0.8421	510.764
GRMZM2G165901	3021	1256	0.6457	488.661
GRMZM2G028521	3016	3130	0.7642	195.764
GRMZM2G139786	3010	850	0.9271	719.439
GRMZM2G102471	2968	1291	0.8033	467.072
GRMZM5G834758	2966	1571	0.8822	383.567
GRMZM2G080466	2951	1557	0.5742	385.059
GRMZM2G122937	2940	1333	0.8297	448.088
GRMZM2G116646	2892	1591	0.9629	369.296
GRMZM2G330019	2884	2766	0.9226	211.831
GRMZM2G013002	2878	1857	0.8449	314.866
GRMZM2G432128	2859	2347	0.706	247.484
GRMZM2G067546	2858	2731	0.9648	212.612
GRMZM2G057823	2849	1697	0.9075	341.081
GRMZM5G814700	2849	1810	0.9624	319.787
GRMZM5G854138	2845	961	0.9594	601.458
GRMZM2G084881	2810	1995	0.8531	286.161
GRMZM2G097059	2785	1186	0.8904	477.075
GRMZM2G340656	2770	2894	0.8746	194.459
GRMZM2G129034	2769	1616	0.7884	348.119
GRMZM2G029912	2762	2452	0.971	228.849
GRMZM2G093405	2762	2002	0.8771	280.289
GRMZM2G017110	2749	2100	0.9995	265.951
GRMZM2G364069	2698	2146	0.4692	255.422
GRMZM2G354604	2697	1322	0.879	414.473
GRMZM5G858094	2696	7464	0.9721	73.3828
GRMZM2G181192	2688	1402	0.9757	389.518
GRMZM2G152328	2675	1989	0.6219	273.234
GRMZM2G178398	2668	3613	0.9729	150.025
GRMZM2G122479	2656	2473	0.9345	218.198
GRMZM2G058910	2655	3761	0.8072	143.419
GRMZM2G360681	2649	3168	0.9975	169.88
GRMZM2G047310	2639	3851	0.867	139.223
GRMZM2G060800	2635	2425	0.8346	220.757
GRMZM2G010356	2634	1921	0.9792	278.57
GRMZM2G080056	2620	1813	0.9686	293.596
GRMZM2G004382	2604	2076	0.92	254.836
GRMZM2G122871	2603	1909	0.8591	277.022
GRMZM2G009335	2589	1914	0.9754	274.812
GRMZM2G023786	2571	1433	0.9532	364.504
GRMZM2G382413	2525	2247	0.9604	228.299
GRMZM2G312110	2521	8706	0.9747	58.8302
GRMZM2G553687	2517	5724	0.9736	89.3367
AC203173.3	2515	2532	0.9708	201.8
GRMZM2G015295	2506	2241	0.8532	227.188
AC234203.1	2502	4491	0.9898	113.185
GRMZM2G049915	2501	1832	0.8466	277.354
GRMZM2G091155	2489	1520	0.9605	332.681
GRMZM2G103342	2453	2120	0.8689	235.076
GRMZM2G058032	2424	1436	0.9373	342.945
GRMZM2G110145	2404	4184	0.7806	116.732
GRMZM2G091481	2392	2242	0.806	216.756
GRMZM2G113696	2384	1520	0.5507	318.646
GRMZM2G147014	2377	1404	0.8212	343.96
GRMZM2G153393	2376	2703	0.9208	178.586
GRMZM2G011588	2374	2952	0.9617	163.384
GRMZM2G352415	2363	1637	0.9866	293.266
GRMZM5G840582	2359	3028	0.961	158.277
GRMZM2G098298	2353	1571	0.9376	304.293
GRMZM2G023418	2352	4506	0.9887	106.046
GRMZM2G071790	2332	1927	0.8972	245.863
GRMZM2G144155	2326	2881	0.9538	164.026
GRMZM2G123558	2321	1275	0.9631	369.838
GRMZM2G029219	2284	2179	0.9651	212.954
GRMZM2G087150	2282	1805	0.7839	256.853
GRMZM2G098346	2277	1685	0.9982	274.542
AC215690.3	2276	1179	0.9958	392.197
GRMZM2G115750	2275	1642	0.9598	281.485
GRMZM2G014240	2274	2894	0.9264	159.639
GRMZM2G099454	2265	1227	0.9307	375.033
GRMZM2G161335	2253	1811	0.9707	252.749
GRMZM2G479885	2223	1558	0.9268	289.88
GRMZM2G124353	2220	2213	0.8861	203.806
GRMZM2G346455	2219	1710	0.9123	263.638
GRMZM2G114570	2208	2689	0.8263	166.822
GRMZM2G129354	2205	2163	0.945	207.109
GRMZM2G053299	2199	2009	0.9094	222.378
GRMZM2G156748	2198	2480	0.9988	180.062
GRMZM2G073725	2195	1781	0.8636	250.39
GRMZM5G876285	2192	878	0.9009	507.215
GRMZM2G014695	2191	2100	0.7657	211.968
GRMZM2G015542	2189	2915	0.6587	152.565
GRMZM2G333980	2186	1449	0.9055	306.498
GRMZM2G411536	2186	11470	0.9246	38.7198
GRMZM2G176647	2182	3659	0.9374	121.154
GRMZM2G077197	2178	2459	0.952	179.947
GRMZM2G094497	2173	2063	0.9321	213.997
GRMZM2G153268	2168	1086	0.9107	405.579
GRMZM2G181151	2168	2279	0.8556	193.269
GRMZM2G106424	2168	1539	0.8765	286.198
GRMZM2G166044	2146	1709	0.9807	255.114
GRMZM2G328500	2142	2543	0.7558	171.127
GRMZM2G058675	2141	2342	0.9163	185.727
GRMZM2G174807	2138	1388	0.8746	312.942
GRMZM2G125356	2128	2083	0.8934	207.553
GRMZM2G057576	2128	5731	0.911	75.4375
GRMZM2G023232	2119	3133	0.9279	137.41
GRMZM2G171518	2107	2086	0.8979	205.209
GRMZM2G134396	2104	2969	0.9808	143.973
GRMZM2G048324	2100	2279	0.9285	187.207
GRMZM2G364349	2095	1785	0.9574	238.447
GRMZM2G067225	2094	2380	0.7294	178.75
GRMZM2G164974	2094	2214	0.9309	192.152
GRMZM2G421857	2093	2598	0.7067	163.673
GRMZM2G151041	2084	3889	0.9337	108.869
GRMZM2G080731	2082	1505	0.8711	281.054
GRMZM2G162755	2075	1880	0.9713	224.237
GRMZM2G055320	2050	2240	0.892	185.931
GRMZM2G015605	2049	803	0.6389	518.409
GRMZM5G835323	2048	1250	0.6992	332.864
GRMZM2G157929	2036	2347	0.9497	176.243
GRMZM2G109842	2031	888	0.9572	464.669
GRMZM5G826714	2029	2080	0.9788	198.182
GRMZM2G025833	2029	2222	0.9703	185.517
GRMZM2G151755	2025	1734	0.3091	237.259
GRMZM2G068682	2021	2161	0.975	190.002
GRMZM2G442658	2018	2277	0.7497	180.055
GRMZM2G366532	2018	2542	0.9264	161.284
GRMZM2G165944	2006	4079	0.9949	99.9134
GRMZM2G070863	2001	2500	0.8452	162.612
GRMZM2G377341	1992	7198	0.9476	56.2243
GRMZM2G048371	1989	1839	0.9478	219.735
GRMZM2G090338	1987	2420	0.9496	166.813
GRMZM2G132759	1969	1284	0.7921	311.549
GRMZM2G026930	1963	1564	0.9763	254.994
GRMZM2G181551	1963	1534	0.811	259.981
GRMZM2G392975	1960	1674	0.7431	237.874
GRMZM2G165413	1959	3534	0.9943	112.62
GRMZM2G415359	1959	1693	0.7939	235.084
GRMZM2G141473	1954	4649	0.9522	85.3908
GRMZM2G052869	1951	1266	0.5932	313.09
GRMZM2G061681	1947	3471	0.9721	113.961
GRMZM5G800112	1944	903	0.9048	437.376
GRMZM2G352129	1942	2698	0.901	146.236
GRMZM5G879278	1937	2327	0.9205	169.114
GRMZM2G108285	1937	1005	0.9483	391.57
GRMZM2G327357	1924	2447	0.9967	159.741
GRMZM2G038281	1921	3426	0.8649	113.916
GRMZM2G031545	1919	1283	0.8114	303.875
GRMZM2G078804	1917	1328	0.9789	293.272
GRMZM2G389233	1914	3609	0.9388	107.746
GRMZM2G134256	1908	1922	0.9157	201.684
GRMZM2G012434	1907	2600	0.8235	149.013
GRMZM2G144030	1905	1617	0.4675	239.349
GRMZM2G005887	1902	1929	0.7838	200.32
GRMZM2G439201	1900	2117	0.4757	182.339
GRMZM2G108348	1897	1542	0.6329	249.936
GRMZM2G027098	1882	1283	0.908	298.016
GRMZM2G079616	1881	1594	0.8864	239.743
GRMZM2G165917	1875	2604	0.7684	146.287
GRMZM2G108474	1874	1471	0.7437	258.823
GRMZM2G088212	1873	2178	0.9683	174.713
AC196475.3	1870	1902	0.938	199.746
GRMZM2G434173	1861	2497	0.7705	151.417
GRMZM2G134806	1860	1359	0.9249	278.061
GRMZM5G837108	1859	1556	0.9126	242.726
GRMZM2G021621	1857	1685	0.8499	223.902
GRMZM2G131912	1850	2163	0.8696	173.765
GRMZM5G864319	1850	2641	0.9549	142.315
GRMZM2G116140	1849	1756	0.5968	213.924
AC233882.1	1845	3921	0.9582	95.5973
GRMZM2G453805	1836	1355	0.9085	275.283
GRMZM2G021299	1831	11999	0.9572	31.002
GRMZM2G157564	1826	2808	0.9783	132.114
GRMZM2G066024	1820	1877	0.7437	196.994
GRMZM2G084181	1820	5156	0.9948	71.7141
GRMZM5G883417	1820	1567	0.9987	235.966
GRMZM2G076062	1818	2836	0.9485	130.237
GRMZM2G027995	1807	1916	0.9447	191.606
GRMZM2G026991	1804	6849	0.9788	53.5126
GRMZM5G833124	1792	2163	0.9454	168.317
GRMZM2G169182	1786	2782	0.9112	130.428
GRMZM2G095727	1786	3454	0.9734	105.052
GRMZM2G003762	1786	1733	0.6947	209.377
GRMZM2G041697	1783	5460	0.9734	66.3445
GRMZM2G180283	1781	1570	0.9268	230.468
GRMZM2G085111	1773	4221	0.9578	85.3375
GRMZM2G019266	1770	2363	0.9505	152.179
GRMZM5G864266	1767	4070	0.9187	88.204
GRMZM2G001645	1763	2554	0.9248	140.242
GRMZM2G022206	1763	1025	0.7951	349.442
GRMZM2G088309	1760	1228	0.8713	291.179
GRMZM5G836222	1759	1247	0.8332	286.58
GRMZM2G128491	1747	1264	0.9462	280.797
GRMZM2G051879	1746	1155	0.6641	307.12
GRMZM2G039639	1742	1184	0.8024	298.912
GRMZM5G815894	1741	1357	0.9049	260.654
GRMZM2G406830	1738	3654	0.9343	96.6335
GRMZM2G155348	1733	2422	0.9088	145.369
GRMZM2G438895	1732	4792	0.9816	73.4307
GRMZM2G053458	1723	1443	0.7838	242.586
GRMZM2G005643	1721	1154	0.805	302.985
GRMZM2G365160	1718	2100	0.9267	166.207
GRMZM2G084819	1717	14668	0.958	23.7819
GRMZM2G116658	1717	3968	0.963	87.9113
GRMZM2G122816	1716	1796	0.9694	194.114
GRMZM2G140667	1711	1312	0.7881	264.949
GRMZM2G142409	1711	1533	0.7489	226.754
GRMZM2G014805	1709	4173	0.9772	83.2032
GRMZM2G326643	1705	6328	0.9701	54.7399
GRMZM2G130348	1704	2606	0.8008	132.844
GRMZM2G701082	1682	2080	0.8779	164.289
GRMZM2G032163	1682	2871	0.9871	119.025
GRMZM2G006080	1680	3172	0.9653	107.603
GRMZM2G145088	1676	4169	0.9746	81.6749
GRMZM2G027723	1673	3924	0.9549	86.619
GRMZM2G087901	1672	2059	0.9621	164.978
GRMZM2G109959	1665	790	0.6468	428.187
GRMZM2G035405	1663	2932	0.9509	115.232
AC233866.1	1663	1344	0.9769	251.385
GRMZM2G027782	1658	1720	0.9343	195.84
GRMZM2G016323	1649	3574	0.9233	93.7373
GRMZM5G829894	1649	1562	0.968	214.48
GRMZM2G431856	1647	1369	0.992	244.42
GRMZM2G378547	1638	2476	0.6951	134.403
GRMZM2G360517	1632	5913	0.9337	56.0736
GRMZM2G099355	1632	7504	0.8443	44.1849
GRMZM2G441347	1629	2519	0.9627	131.383
GRMZM2G077307	1626	3454	0.9606	95.6411
GRMZM2G077233	1624	3870	0.6106	85.2553
GRMZM2G029249	1623	1432	0.9183	230.262
GRMZM2G163849	1613	7070	0.9208	46.3512
GRMZM2G169384	1603	1793	0.923	181.635
GRMZM5G854613	1602	2045	0.9873	159.153
GRMZM2G094712	1600	2163	0.8104	150.283
GRMZM2G701689	1599	3066	0.9853	105.955
GRMZM5G864414	1598	2755	0.9891	117.842
GRMZM2G105571	1597	1735	0.9683	187.004
GRMZM2G101875	1592	2330	0.9296	138.814
GRMZM2G057514	1591	2024	0.8508	159.7
GRMZM2G086489	1591	2700	0.8878	119.716
GRMZM2G075077	1589	2738	0.9368	117.906
GRMZM2G055331	1587	3938	0.9518	81.8743
GRMZM2G082271	1587	4012	0.841	80.3641
GRMZM2G305115	1585	2131	0.8747	151.11
GRMZM2G041980	1582	1505	0.8458	213.558
GRMZM2G424181	1578	4857	0.9963	66.0063
GRMZM2G128056	1577	2032	0.9434	157.672
GRMZM2G325575	1573	1867	0.6786	171.171
GRMZM2G044038	1571	2100	0.9076	151.986
GRMZM2G082855	1570	3756	0.9529	84.922
GRMZM2G154523	1567	1780	0.8697	178.853
GRMZM5G870176	1561	4558	0.9743	69.5785
GRMZM2G131969	1557	1981	0.8279	159.68
GRMZM2G317406	1555	939	0.7902	336.443
GRMZM2G100288	1553	3368	0.897	93.6797
GRMZM2G117707	1552	2779	0.6707	113.462
GRMZM2G099363	1552	2185	0.6027	144.307
GRMZM2G113408	1549	2677	0.774	117.557
GRMZM2G155532	1547	2767	0.961	113.587
GRMZM2G450163	1546	2430	0.9115	129.256
GRMZM2G150248	1546	2244	0.9162	139.969
GRMZM2G012611	1545	2786	0.9978	112.666
GRMZM2G122277	1544	3599	0.8475	87.1589
GRMZM2G113592	1541	3578	0.9637	87.5001
GRMZM2G114954	1538	1012	0.2836	308.761
GRMZM2G101480	1530	1195	0.8745	260.118
GRMZM2G450125	1525	2863	0.8704	108.217
GRMZM2G361064	1524	1586	0.7409	195.222
GRMZM2G077356	1523	1585	0.8177	195.217
GRMZM2G104542	1522	2342	0.8817	132.03
GRMZM5G801875	1514	2165	0.9478	142.074
GRMZM2G115812	1513	7741	0.7183	39.7089
GRMZM2G152963	1511	4346	0.8762	70.6352
GRMZM2G006894	1510	3409	0.9707	89.9904
GRMZM2G015989	1509	2635	0.8133	116.347
GRMZM2G476009	1509	1088	0.8603	281.778
GRMZM2G106263	1507	2270	0.7806	134.876
AC199526.5	1505	2259	0.3457	135.353
GRMZM2G436593	1503	1650	0.9842	185.064
GRMZM2G124434	1503	1546	0.9198	197.513
GRMZM5G858454	1501	3201	0.7588	95.2667
GRMZM2G012391	1499	2284	0.8932	133.337
GRMZM2G070360	1499	1282	0.9431	237.553
GRMZM2G030422	1494	4236	0.8942	71.6541
GRMZM5G831102	1493	1647	0.9217	184.167
GRMZM2G130230	1492	2115	0.8123	143.319
GRMZM2G169270	1489	4826	0.8719	62.6836
GRMZM2G162486	1489	1383	0.8048	218.735
GRMZM2G395844	1487	1205	0.5676	250.709
GRMZM2G020484	1485	2950	0.9288	102.271
GRMZM2G126038	1480	2781	0.8364	108.12
GRMZM2G471142	1477	2132	0.9325	140.747
GRMZM2G119886	1475	2003	0.9051	149.609
GRMZM2G105387	1472	2247	0.5487	133.092
GRMZM2G035417	1470	2025	0.8533	147.482
GRMZM2G160113	1470	1070	0.9794	279.113
GRMZM2G107082	1470	1660	0.9651	179.91
GRMZM2G025242	1469	1637	0.8827	182.314
GRMZM2G166767	1468	3466	0.7519	86.0486
GRMZM5G872068	1466	1489	0.9167	200.026
GRMZM2G057646	1463	3127	0.9811	95.0523
GRMZM2G045070	1461	2915	0.8875	101.826
GRMZM2G073465	1459	2077	0.9167	142.714
GRMZM2G054123	1458	1838	0.7916	161.16
GRMZM2G157018	1457	1001	0.95	295.714
GRMZM2G033526	1456	2643	0.8078	111.921
GRMZM2G127665	1454	3914	0.4499	75.4727
GRMZM2G074906	1444	5484	0.6926	53.4954
GRMZM2G083810	1442	1193	0.8365	245.568
GRMZM2G010960	1433	4930	0.9428	59.0535
GRMZM2G012030	1432	6999	0.7107	41.5674
GRMZM2G128877	1432	2325	0.969	125.131
GRMZM2G018275	1429	1393	0.9605	208.414
GRMZM2G104118	1429	2105	0.8945	137.92
GRMZM2G085577	1429	2881	0.9854	100.771
GRMZM2G066460	1425	1365	0.9055	212.094
GRMZM2G103812	1424	2097	0.8665	137.961
GRMZM2G006765	1422	1682	0.9495	171.759
GRMZM2G180951	1422	3220	0.9935	89.7202
AC203535.4	1418	2778	0.9903	103.703
GRMZM2G153977	1418	1232	0.8287	233.836
GRMZM2G479608	1417	1204	0.9369	239.106
GRMZM2G125635	1417	2100	0.9595	137.087
GRMZM2G164020	1416	1622	0.7435	177.361
GRMZM2G317584	1414	2458	0.9638	116.873
GRMZM2G072205	1414	2375	0.9259	120.957
GRMZM2G012966	1409	4826	0.8703	59.3157
GRMZM2G066950	1406	2045	0.9976	139.681
GRMZM2G116135	1405	1070	0.8879	266.771
GRMZM5G883741	1404	2083	0.9789	136.938
GRMZM2G005562	1403	2629	0.9878	108.421
GRMZM2G060296	1403	2322	0.9427	122.756
GRMZM2G157317	1401	1977	0.953	143.972
GRMZM2G444801	1400	2618	0.9668	108.644
GRMZM2G358059	1400	1861	0.8662	152.837
GRMZM2G060702	1399	2272	0.3746	125.1
GRMZM2G128171	1398	2208	0.726	128.634
GRMZM2G135186	1395	1865	0.8724	151.964
GRMZM2G003565	1394	2107	0.926	134.414
GRMZM2G150295	1394	1849	0.8345	153.169
GRMZM2G074361	1392	914	0.9737	309.414
GRMZM2G098278	1391	1847	0.9957	153.005
GRMZM2G161154	1386	837	0.7443	336.422
GRMZM5G899851	1385	2751	0.964	102.283
GRMZM5G833699	1385	2848	0.8413	98.7998
GRMZM2G126397	1383	923	0.9523	304.416
GRMZM2G169372	1381	1041	0.8396	269.519
GRMZM2G027663	1378	2669	0.9685	104.893
GRMZM2G083847	1377	2314	0.8405	120.897
GRMZM2G051782	1375	1757	0.9636	158.993
GRMZM2G043822	1375	2103	0.9101	132.834
GRMZM2G146246	1374	1758	0.7355	158.787
GRMZM2G082517	1368	1047	0.9484	265.452
GRMZM2G016511	1366	1149	0.9399	241.533
GRMZM2G323418	1365	2071	0.8242	133.906
GRMZM2G036092	1360	1501	0.9001	184.079
GRMZM2G176397	1359	3788	0.9134	72.888
GRMZM2G078143	1358	1948	0.9076	141.631
GRMZM2G155329	1356	1266	0.8246	217.607
GRMZM2G120563	1356	5542	0.5446	49.7095
GRMZM2G180988	1354	3654	0.9291	75.2829
GRMZM2G111818	1354	3859	0.9531	71.2837
GRMZM2G430600	1353	1954	0.7165	140.676
GRMZM2G310115	1353	3289	0.4728	83.5757
GRMZM2G134980	1353	1813	0.5852	151.616
GRMZM2G109130	1351	2891	0.9737	94.9409
GRMZM2G017249	1350	1789	0.9978	153.31
GRMZM2G120304	1349	1401	0.9643	195.623
GRMZM2G118610	1349	1818	0.8339	150.752
GRMZM2G150772	1346	5204	0.9858	52.5477
GRMZM2G074267	1343	2684	0.9031	101.658
GRMZM2G419209	1343	853	0.5123	319.87
GRMZM2G048434	1340	1931	0.9451	140.984
GRMZM2G157727	1339	4059	0.9305	67.0205
GRMZM2G166281	1339	2328	0.5653	116.854
GRMZM2G159724	1338	2489	0.8473	109.214
GRMZM5G844173	1335	3982	0.953	68.1124
GRMZM2G154218	1325	1782	0.6027	151.062
GRMZM2G134668	1324	2362	0.8844	113.882
GRMZM2G001116	1319	2456	0.9707	109.11
GRMZM2G145715	1317	2069	0.8845	129.322
GRMZM2G125032	1316	1279	0.9593	209.041
GRMZM2G087326	1316	1493	0.9344	179.078
GRMZM2G052088	1314	1627	0.8556	164.079
GRMZM2G163081	1313	1513	0.811	176.308
GRMZM2G065757	1313	2521	0.5299	105.813
GRMZM2G098496	1312	1435	0.9331	185.75
GRMZM2G365374	1310	2517	0.9229	105.739
GRMZM2G034924	1309	1330	0.8541	199.956
GRMZM2G024612	1309	8129	0.9774	32.7151
GRMZM2G099860	1308	4077	0.8624	65.1798
GRMZM2G157462	1307	3384	0.94	78.4678
AC190609.3	1302	2085	0.8432	126.868
GRMZM2G029107	1292	1097	0.9316	239.278
GRMZM2G146819	1291	4332	0.9931	60.5458
GRMZM2G111846	1289	7881	0.9157	33.229
GRMZM2G030784	1281	1700	0.7312	153.09
GRMZM2G401664	1281	1827	0.9622	142.448
GRMZM2G156857	1276	1188	0.9613	218.213
GRMZM2G025832	1275	1891	0.963	136.982
GRMZM2G059151	1274	2322	0.9014	111.469
GRMZM2G093050	1273	3467	0.9296	74.5969
GRMZM2G035741	1272	1780	0.7567	145.182
GRMZM2G176595	1271	1218	0.8555	212.004
GRMZM2G422464	1267	6222	0.9752	41.3707
GRMZM2G019404	1259	3384	0.6312	75.5861
GRMZM2G172369	1258	3453	0.916	74.0168
GRMZM2G153815	1258	2716	0.8744	94.1016
GRMZM2G003963	1257	1730	0.8896	147.617
GRMZM2G347056	1256	2375	0.9802	107.442
GRMZM2G106590	1254	2121	0.8765	120.117
GRMZM2G174757	1253	2533	0.9767	100.499
GRMZM2G155384	1251	3343	0.9225	76.0269
GRMZM2G015875	1250	4034	0.939	62.9536
GRMZM2G133173	1248	2715	0.9212	93.388
GRMZM2G161868	1243	2068	0.6775	122.114
GRMZM2G098577	1243	3141	0.9277	80.3988
GRMZM2G110504	1243	899	0.9333	280.904
GRMZM2G341271	1243	3160	0.919	79.9154
GRMZM2G110153	1242	1210	0.9256	208.537
GRMZM2G178958	1241	2170	0.7023	116.187
GRMZM2G087186	1238	2506	0.8543	100.366
GRMZM2G036708	1238	1771	0.8605	142.02
GRMZM5G806449	1238	1974	0.9341	127.415
AC205703.4	1237	3462	0.9529	72.592
GRMZM2G035985	1237	4170	0.7882	60.2671
GRMZM2G084465	1231	1714	0.6826	145.913
GRMZM2G329144	1229	1018	0.943	245.273
GRMZM2G001297	1227	2720	0.9772	91.6478
GRMZM2G041328	1220	4228	0.7332	58.6234
GRMZM2G073535	1220	2115	0.7371	117.191
GRMZM5G896560	1219	879	0.9556	281.748
GRMZM2G137348	1219	3537	0.8798	70.0188
GRMZM2G155357	1217	2048	0.9868	120.728
GRMZM2G116034	1216	2541	0.6883	97.2244
GRMZM2G043435	1214	3912	0.9443	63.0472
GRMZM2G025175	1213	933	0.9357	264.135
AC155377.1	1212	5390	0.9725	45.6836
GRMZM2G131334	1212	2848	0.9354	86.4587
GRMZM2G078033	1212	2411	0.8959	102.13
GRMZM2G372180	1208	3177	0.9597	77.2496
GRMZM2G447785	1208	1226	0.7618	200.181
GRMZM2G056270	1206	1608	0.8881	152.373
GRMZM2G123896	1204	1622	0.6572	150.807
GRMZM5G894233	1203	2704	0.7467	90.3868
GRMZM2G459746	1201	3369	0.9558	72.425
GRMZM2G128971	1200	2104	0.8845	115.873
GRMZM2G108153	1200	1701	0.7837	143.325
GRMZM2G132903	1199	2845	0.9142	85.6216
GRMZM2G125294	1196	6126	0.9714	39.6644
GRMZM5G877316	1194	1762	0.9722	137.672
GRMZM2G013318	1193	2511	0.9407	96.525
GRMZM2G124335	1192	2470	0.8668	98.045
GRMZM2G079236	1191	2981	0.9594	81.1701
GRMZM2G395508	1191	1827	0.9376	132.44
GRMZM5G848768	1190	1977	0.9221	122.289
GRMZM2G158872	1190	3297	0.9363	73.3288
GRMZM2G019236	1190	3864	0.9407	62.5686
AC211394.4	1189	1980	0.9783	122.001
GRMZM2G362850	1188	3642	0.9308	66.2709
GRMZM2G026218	1186	4245	0.9444	56.7614
GRMZM2G108849	1185	1790	0.7838	134.497
GRMZM2G125544	1184	2148	0.9614	111.986
GRMZM2G175243	1184	758	0.9604	317.343
GRMZM5G840955	1184	1263	0.9691	190.456
GRMZM2G034764	1182	1893	0.8759	126.857
GRMZM2G104876	1181	2626	0.8439	91.3695
GRMZM2G343916	1180	3866	0.9858	62.0107
GRMZM2G124886	1179	3688	0.9227	64.9485
GRMZM2G178822	1178	2638	0.9598	90.7229
GRMZM2G121333	1178	2140	0.9505	111.835
GRMZM2G038001	1175	2513	0.9885	94.993
GRMZM2G042313	1175	2526	0.998	94.5041
GRMZM2G072886	1173	1089	0.6933	218.835
GRMZM5G835213	1173	2521	0.691	94.5304
GRMZM2G096548	1167	2103	0.932	112.74
GRMZM2G033644	1165	2236	0.8605	105.852
GRMZM2G137558	1164	2697	0.9336	87.6836
GRMZM2G469523	1164	1126	0.9458	210.02
GRMZM2G043489	1163	4104	0.8448	57.573
GRMZM2G102161	1161	1215	0.8914	194.134
GRMZM2G017229	1161	1996	0.9459	118.173
GRMZM2G057535	1158	1890	0.9635	124.478
GRMZM2G126453	1158	3171	0.9615	74.1923
GRMZM2G135588	1157	2272	0.8759	103.46
GRMZM2G018950	1156	2086	0.8869	112.587
GRMZM2G434277	1156	2736	0.936	85.8397
GRMZM2G179737	1156	1565	0.9744	150.069
GRMZM2G033208	1156	3653	0.7243	64.2916
GRMZM2G473001	1155	3540	0.915	66.2865
GRMZM2G123922	1155	3408	0.9478	68.8539
GRMZM2G141432	1153	1560	0.509	150.159
GRMZM2G116086	1151	2974	0.9203	78.6286
GRMZM2G093900	1151	2095	0.8234	111.619
GRMZM2G152258	1151	1512	0.8485	154.657
GRMZM5G881464	1150	3191	0.9508	73.2179
GRMZM2G058522	1149	1552	0.6508	150.409
GRMZM2G033478	1149	6597	0.9817	35.3851
GRMZM2G069162	1148	2816	0.7056	82.8239
GRMZM2G002825	1148	1377	0.6028	169.377
GRMZM2G439339	1147	6614	0.9298	35.2327
GRMZM2G108829	1147	2734	0.7063	85.2337
GRMZM2G047093	1146	3465	0.9596	67.1936
GRMZM2G137839	1146	1354	0.7976	171.954
GRMZM2G036765	1145	2793	0.9391	83.2877
GRMZM2G158568	1145	2285	0.5943	101.804
GRMZM2G174644	1145	2003	0.9356	116.137
GRMZM2G311165	1144	5205	0.6498	44.6531
AC233949.1	1140	2538	0.8448	91.2556
GRMZM2G025598	1140	2882	0.8345	80.3632
AC207890.3	1140	2961	0.9858	78.2191
GRMZM2G024887	1139	1040	0.9173	222.503
GRMZM2G081155	1138	2311	0.9585	100.043
GRMZM2G101446	1134	1182	0.533	194.913
GRMZM2G039454	1134	3691	0.9285	62.4188
GRMZM2G135470	1133	2085	0.8801	110.4
GRMZM2G108277	1133	1716	0.4155	134.14
GRMZM2G063435	1133	1860	0.8892	123.755
GRMZM2G308203	1133	2934	0.9564	78.4542
GRMZM2G017835	1130	2651	0.9815	86.5994
GRMZM2G149636	1129	2218	0.9427	103.414
GRMZM2G345055	1129	3054	0.9601	75.1054
GRMZM2G014914	1129	1957	0.6587	117.206
GRMZM2G104294	1127	2673	0.8492	85.6587
GRMZM2G095124	1126	3204	0.9654	71.399
GRMZM2G006178	1125	2380	0.9727	96.0333
GRMZM2G140051	1125	1713	0.9002	133.426
GRMZM2G462635	1123	959	0.9885	237.907
GRMZM2G153162	1119	6145	0.9452	36.996
GRMZM2G163154	1118	2245	0.9915	101.175
GRMZM2G079682	1117	2067	0.9613	109.789
GRMZM2G044027	1117	2234	0.6307	101.582
GRMZM2G056645	1116	8354	0.9394	27.1404
GRMZM5G827266	1115	1042	0.6046	217.397
GRMZM2G320175	1114	2280	0.2241	99.2651
GRMZM5G805387	1114	1976	0.586	114.537
GRMZM2G394827	1112	1270	0.8173	177.888
GRMZM2G044469	1112	1566	0.977	144.264
GRMZM2G026143	1112	589	0.9728	383.562
GRMZM2G010637	1111	6355	0.8703	35.5177
GRMZM2G133129	1111	610	0.8738	370.025
GRMZM2G147716	1111	1522	0.8568	148.302
GRMZM2G042992	1108	4464	0.9496	50.4269
GRMZM5G800586	1108	1700	0.9418	132.415
GRMZM2G169005	1107	1345	0.881	167.214
GRMZM2G112579	1106	1753	0.8186	128.18
GRMZM2G134027	1105	2749	0.8934	81.6646
GRMZM2G011070	1105	4285	0.9592	52.3911
GRMZM2G104017	1104	1786	0.6495	125.584
GRMZM2G082390	1102	1119	0.6845	200.077
GRMZM2G014788	1102	3986	0.9802	56.1682
GRMZM2G078641	1101	3933	0.2197	56.8735
GRMZM2G472428	1101	6423	0.9746	34.8254
GRMZM2G123540	1101	1899	0.9889	117.79
GRMZM5G882986	1099	1998	0.955	111.75
GRMZM2G145236	1099	2752	0.9241	81.1326
GRMZM2G059015	1098	3300	0.9509	67.5981
GRMZM2G061928	1098	1806	0.6346	123.518
GRMZM2G108780	1095	1223	0.6361	181.901
GRMZM2G001895	1093	6485	0.9283	34.2418
GRMZM2G063676	1091	3386	0.8984	65.4612
GRMZM2G135570	1091	1121	0.868	197.727
GRMZM2G095593	1091	1348	0.885	164.43
GRMZM2G127948	1089	1815	0.7129	121.898
GRMZM2G080270	1089	2494	0.9787	88.7111
GRMZM2G094388	1089	1213	0.9126	182.395
GRMZM2G424205	1088	2028	0.5237	108.995
GRMZM5G862540	1087	1975	0.9792	111.817
GRMZM2G006130	1087	3931	0.4083	56.1788
GRMZM2G010363	1085	1789	0.9413	123.216
GRMZM2G175779	1085	2750	0.8956	80.1573
GRMZM2G468855	1084	1385	0.8491	159.011
GRMZM2G456568	1083	3377	0.7575	65.1544
GRMZM2G083173	1081	2893	0.9682	75.9143
GRMZM2G073155	1079	600	0.8967	365.356
GRMZM2G406674	1079	3182	0.7033	68.8918
GRMZM2G156068	1079	1230	0.9065	178.223
GRMZM2G047274	1079	1806	0.9374	121.381
GRMZM2G013986	1078	2810	0.9413	77.9397
GRMZM2G422750	1076	2217	0.6125	98.6036
GRMZM2G431573	1075	3404	0.9548	64.1601
GRMZM2G462140	1075	1704	0.9026	128.17
GRMZM2G010884	1074	1676	0.8144	130.19
GRMZM2G127609	1072	1809	0.7203	120.393
GRMZM2G130586	1072	3155	0.9334	69.0306
GRMZM2G037204	1071	2874	0.5651	75.7093
GRMZM2G172664	1069	1054	0.5342	206.055
GRMZM2G018103	1068	1822	0.8754	119.088
GRMZM2G399073	1068	3370	0.7748	64.3854
GRMZM2G321870	1068	2037	0.9696	106.519
GRMZM2G010302	1067	1657	0.889	130.824
GRMZM5G877388	1066	1393	0.6238	155.472
GRMZM2G114162	1066	6466	0.9267	33.4941
GRMZM2G031107	1065	1956	0.9013	110.618
GRMZM2G069542	1065	3422	0.9398	63.2289
GRMZM2G065083	1064	1047	0.8634	206.463
GRMZM2G166646	1062	2051	0.9766	105.197
GRMZM2G092959	1061	2183	0.9185	98.7434
GRMZM5G848945	1060	2811	0.9392	76.611
GRMZM2G448511	1060	823	0.8493	261.669
GRMZM2G089406	1058	5242	0.9569	41.0048
GRMZM2G065494	1056	3407	0.6716	62.9706
AC209784.3	1056	2049	0.0239	104.705
GRMZM2G321725	1055	2109	0.7857	101.63
GRMZM2G102499	1055	2206	0.5956	97.1613
GRMZM2G326472	1055	4202	0.9317	51.0085
GRMZM2G375904	1053	2600	0.8438	82.2813
GRMZM2G044306	1052	6143	0.9608	34.7922
GRMZM2G439311	1052	2152	0.8657	99.3161
GRMZM2G119782	1051	861	0.9605	247.997
GRMZM2G462613	1051	3661	0.9246	58.3243
GRMZM2G446050	1051	5975	0.7946	35.7364
GRMZM2G001500	1050	2654	0.9269	80.3775
GRMZM2G320013	1048	3442	0.964	61.8581
GRMZM5G824944	1046	2344	0.9394	90.661
GRMZM2G161512	1045	1948	0.9825	108.987
GRMZM2G165357	1045	2098	0.734	101.195
GRMZM2G374302	1043	2202	0.9682	96.2306
GRMZM2G059590	1042	4191	0.889	50.5122
GRMZM2G055619	1042	5813	0.7433	36.4178
GRMZM2G172244	1042	1097	0.7593	192.978
GRMZM2G098239	1042	2246	0.7876	94.255
GRMZM2G109560	1041	3264	0.9314	64.7958
GRMZM2G088088	1039	2476	0.9576	85.2533
GRMZM2G023289	1035	2474	0.9568	84.9937
GRMZM2G016655	1032	2767	0.9675	75.7734
GRMZM2G089713	1031	3223	0.8182	64.9897
GRMZM2G315375	1031	4672	0.9852	44.8334
GRMZM2G303631	1031	2712	0.6527	77.2352
GRMZM2G105019	1030	1745	0.8017	119.919
GRMZM5G885644	1029	2853	0.9671	73.2757
GRMZM2G062354	1029	2848	0.9547	73.4043
GRMZM2G167932	1028	1794	0.9326	116.417
GRMZM2G456000	1026	2635	0.9742	79.1067
GRMZM2G432722	1025	3203	0.9944	65.0149
GRMZM5G862817	1025	1788	0.8669	116.467
GRMZM2G029323	1024	1840	0.9114	113.065
GRMZM2G009808	1023	3621	0.8669	57.3976
GRMZM2G375116	1021	3535	0.9542	58.679
GRMZM2G131473	1021	1922	0.9516	107.924
GRMZM2G145518	1020	1779	0.8465	116.485
GRMZM2G109039	1019	2062	0.8589	100.4
GRMZM2G062499	1019	1797	0.985	115.205
GRMZM2G109009	1018	3222	0.9749	64.1902
GRMZM2G474459	1018	9064	0.1434	22.8178
GRMZM2G022180	1017	2427	0.7495	85.1329
GRMZM2G139894	1017	3445	0.9837	59.9761
GRMZM2G153722	1017	6166	0.9741	33.5092
GRMZM2G056068	1016	2636	0.5599	78.3059
GRMZM2G025231	1015	4171	0.9298	49.4393
GRMZM2G074792	1014	2768	0.9068	74.4249
GRMZM2G005710	1011	1285	0.9206	159.843
GRMZM2G116427	1011	1276	0.9052	160.971
GRMZM2G002786	1010	1226	0.8491	167.37
GRMZM2G012052	1010	894	0.9105	229.525
GRMZM2G353024	1008	1925	0.76	106.384
GRMZM2G118037	1008	939	0.8392	218.093
GRMZM5G803952	1006	970	0.9165	210.704
GRMZM2G021331	1006	2290	0.8354	89.2501
GRMZM2G020920	1004	4287	0.9568	47.5802
GRMZM2G141587	1003	3353	0.9556	60.7734
GRMZM2G375222	1002	4849	0.9406	41.9819
GRMZM2G164663	1002	2593	0.892	78.5076
GRMZM2G159744	1002	4590	0.9429	44.3508
GRMZM2G429118	1001	2115	0.895	96.1546
GRMZM2G156673	1000	1736	0.5893	117.03
GRMZM2G181359	1000	1723	0.9716	117.913
GRMZM2G112336	1000	3910	0.8532	51.96
GRMZM2G416069	1000	2003	0.9256	101.43
GRMZM2G130987	999	1797	0.98	112.944
GRMZM2G063060	997	2890	0.8426	70.088
GRMZM2G065012	996	4197	0.6235	48.2133
GRMZM2G004699	992	1798	0.8265	112.09
GRMZM2G055643	991	2104	0.9092	95.6917
GRMZM2G464137	989	1726	0.861	116.413
GRMZM5G887054	988	1182	0.8342	169.819
GRMZM2G386824	986	3020	0.9219	66.331
GRMZM2G146115	986	1730	0.9624	115.792
GRMZM2G304362	986	3366	0.8975	59.5126
GRMZM2G113202	985	3966	0.8669	50.458
GRMZM2G038783	985	1610	0.9534	124.296
GRMZM2G166089	984	2796	0.9438	71.4997
GRMZM2G083716	983	2879	0.7496	69.3678
GRMZM2G107116	981	4665	0.9498	42.7232
GRMZM2G027875	980	2942	0.9184	67.6752
GRMZM2G082916	980	4837	0.9467	41.162
GRMZM2G137037	979	1179	0.9754	168.7
GRMZM2G101711	976	4566	0.9325	43.427
GRMZM2G126190	975	1816	0.9036	109.077
GRMZM2G081949	975	1660	0.8175	119.328
GRMZM2G358311	975	3898	0.9854	50.817
GRMZM2G083243	972	2010	0.906	98.2464
GRMZM2G363460	971	1839	0.9734	107.271
GRMZM2G150484	971	3373	0.9238	58.4856
GRMZM2G056772	969	808	0.8874	243.646
GRMZM2G053781	969	2354	0.946	83.6303
GRMZM2G166694	969	3274	0.8681	60.13
GRMZM2G360339	969	815	0.811	241.553
GRMZM2G040397	968	1932	0.9337	101.792
GRMZM2G122810	967	1711	0.8732	114.821
GRMZM2G101760	963	3453	0.9438	56.6599
GRMZM2G012501	962	5122	0.7866	38.1577
GRMZM5G813217	960	2747	0.9443	71.0001
GRMZM2G401308	959	1580	0.4873	123.313
GRMZM2G165998	959	1914	0.5068	101.794
GRMZM2G090274	959	2020	0.9574	96.4525
GRMZM2G066222	957	1234	0.6726	157.559
GRMZM2G124175	957	1817	0.7413	107.005
GRMZM2G018372	957	3916	0.7056	49.6496
GRMZM2G359038	956	2356	0.9117	82.4383
GRMZM2G084812	956	1317	0.9241	147.475
GRMZM2G335287	955	5545	0.9059	34.9903
GRMZM2G048883	954	2928	0.8921	66.1948
GRMZM2G013619	954	1762	0.7032	109.999
GRMZM2G086496	954	2492	0.9924	77.7762
GRMZM2G055204	952	2658	0.6926	72.766
GRMZM2G455557	952	3465	0.8569	55.8187
GRMZM2G074479	951	1837	0.6424	105.176
GRMZM2G111269	950	2440	0.8701	79.1007
GRMZM2G054559	950	3274	0.8797	58.951
GRMZM2G154007	950	1856	0.9359	103.99
GRMZM2G049269	950	3238	0.8876	59.6064
GRMZM2G108655	950	4285	0.891	45.0421
GRMZM5G851698	949	1304	0.8466	147.855
GRMZM2G177005	948	1036	0.8784	185.907
GRMZM2G107473	947	1440	0.9292	133.608
GRMZM2G160526	945	1700	0.4406	112.935
GRMZM2G111642	945	4188	0.8897	45.8428
GRMZM2G149153	944	7521	0.931	25.5001
GRMZM2G341729	944	1785	0.5384	107.443
GRMZM2G168449	942	3656	0.9163	52.3469
GRMZM2G070961	940	2763	0.9055	69.1183
GRMZM2G066197	939	1202	0.7388	158.711
GRMZM2G378906	939	3430	0.9003	55.6183
GRMZM2G167872	939	1672	0.9587	114.097
GRMZM2G010342	939	5035	0.9648	37.8889
GRMZM2G008356	938	3382	0.9521	56.3476
GRMZM2G150256	937	1894	0.981	100.509
GRMZM2G127101	937	2362	0.895	80.5946
GRMZM2G127453	935	2333	0.6545	81.4223
GRMZM2G171311	935	2027	0.9482	93.7139
GRMZM2G305046	935	997	0.7703	190.53
GRMZM2G393471	935	7061	0.9482	26.9024
GRMZM2G148200	933	2857	0.9153	66.3465
GRMZM2G409865	931	2098	0.999	90.1551
GRMZM2G125271	931	1178	0.8676	160.565
GRMZM2G122230	931	930	0.9247	203.382
GRMZM2G171387	930	1005	0.793	188.002
GRMZM2G402936	930	1326	0.6938	142.49
GRMZM2G098520	929	2278	0.4372	82.853
GRMZM2G031311	928	2434	0.9729	77.4593
GRMZM2G149576	927	2204	0.9555	85.4505
GRMZM2G447745	927	5941	0.8929	31.7005
GRMZM2G340224	927	2410	0.7087	78.1464
GRMZM2G056079	925	3283	0.9443	57.2423
GRMZM2G101523	925	3573	0.9771	52.5963
GRMZM2G069095	924	3105	0.8589	60.4584
GRMZM2G173067	923	1987	0.7821	94.3735
GRMZM2G435373	922	1839	0.9576	101.858
GRMZM2G062953	922	2619	0.95	71.5223
GRMZM5G825515	921	3217	0.9263	58.1641
GRMZM2G128549	921	2488	0.9912	75.2065
GRMZM2G179523	921	2591	0.9714	72.2168
GRMZM2G149556	920	993	0.6566	188.228
GRMZM2G062554	919	2106	0.6534	88.655
GRMZM2G009845	919	2553	0.9424	73.1326
GRMZM2G011355	918	1739	0.4186	107.248
GRMZM2G017414	918	3289	0.8696	56.7055
GRMZM2G109472	918	4100	0.8012	45.4889
GRMZM5G886969	918	1969	0.9634	94.7203
GRMZM2G064695	917	1952	0.9052	95.4412
GRMZM2G027451	916	2035	0.6477	91.4487
GRMZM2G102000	915	3603	0.9023	51.5945
GRMZM2G160585	915	2332	0.8705	79.7148
GRMZM2G166035	915	1751	0.8567	106.165
GRMZM5G873455	914	761	0.9159	244.01
GRMZM2G104418	914	1634	0.9382	113.642
GRMZM2G012263	914	1603	0.9919	115.84
GRMZM2G134797	913	1237	0.7445	149.95
GRMZM2G098039	911	3750	0.9339	49.3553
GRMZM2G078781	910	3037	0.971	60.8756
GRMZM2G415215	907	7897	0.938	23.3341
GRMZM2G424857	905	3412	0.5791	53.8872
GRMZM2G060937	904	778	0.9306	236.067
GRMZM5G831993	903	1838	0.9276	99.8133
GRMZM2G168096	903	6322	0.9592	29.0188
GRMZM2G048472	902	1975	0.9539	92.7867
GRMZM2G138589	902	2491	0.8483	73.5663
GRMZM2G431708	902	2982	0.943	61.4533
GRMZM2G110378	902	2004	0.8049	91.444
GRMZM2G152891	901	1160	0.7776	157.802
GRMZM2G053600	900	2201	0.8796	83.0747
AC208221.3	900	744	0.6626	245.763
GRMZM2G095955	899	2344	0.7679	77.9199
GRMZM2G163888	899	3110	0.9318	58.7281
GRMZM2G394203	897	1123	0.7916	162.278
GRMZM2G457562	897	1658	0.7201	109.914
GRMZM2G035584	897	1910	0.8628	95.4125
AC218972.3	896	2598	0.9403	70.0673
GRMZM2G180720	896	1918	0.9353	94.9086
GRMZM2G460406	895	1630	0.8595	111.553
GRMZM2G094123	895	1984	0.933	91.649
GRMZM2G064799	894	2559	0.8621	70.9763
GRMZM2G409312	894	1849	0.9789	98.2306
GRMZM2G350802	893	2316	0.9456	78.3356
GRMZM2G078876	893	1213	0.873	149.567
GRMZM2G089409	893	924	0.7608	196.348
GRMZM2G108766	892	1855	0.9078	97.6939
GRMZM2G094928	891	1733	0.6376	104.454
GRMZM2G179941	891	3717	0.9058	48.7003
GRMZM5G845736	891	843	0.6975	214.732
GRMZM2G450920	890	6755	0.9236	26.7677
GRMZM2G138516	889	2072	0.957	87.1682
GRMZM2G153138	889	3673	0.761	49.173
GRMZM2G396553	888	3369	0.886	53.5498
GRMZM2G334628	888	3000	0.5527	60.1365
GRMZM2G135283	887	2224	0.8264	81.028
GRMZM2G085086	886	1010	0.905	178.221
GRMZM2G538064	886	1760	0.9881	102.274
GRMZM2G058870	885	5732	0.978	31.3678
GRMZM2G112805	884	1357	0.9211	132.348
GRMZM2G438722	882	3272	0.8845	54.7648
GRMZM2G075320	882	4953	0.9301	36.1782
GRMZM2G154595	881	1648	0.9302	108.609
GRMZM2G084063	881	1162	0.512	154.034
GRMZM2G028986	878	968	0.4267	184.275
GRMZM2G061950	878	1379	0.9449	129.353
GRMZM5G870752	878	1178	0.9236	151.424
GRMZM2G058289	876	2640	0.8852	67.4134
GRMZM2G042118	876	1393	0.6382	127.761
GRMZM2G142984	876	1402	0.9344	126.941
GRMZM2G064868	876	3925	0.9567	45.3431
GRMZM2G041175	875	1343	0.9397	132.367
GRMZM2G324471	875	1502	0.9188	118.354
GRMZM2G162688	874	2194	0.9335	80.9322
GRMZM2G418644	874	2334	0.2151	76.0776
GRMZM2G074914	873	1893	0.8954	93.6936
GRMZM5G872392	873	1852	0.9433	95.7678
GRMZM2G094742	873	1245	0.6731	142.459
GRMZM2G042074	873	3944	0.9138	44.9701
GRMZM2G181362	872	3731	0.9619	47.4829
GRMZM2G062914	872	1779	0.9359	99.5834
GRMZM2G029186	872	4584	0.9586	38.6472
GRMZM2G020187	872	2246	0.923	78.8775
GRMZM5G813470	871	2430	0.9844	72.8213
GRMZM2G338259	871	3192	0.7957	55.4372
GRMZM2G050193	871	2100	0.9276	84.2646
GRMZM2G030167	870	1270	0.848	139.175
GRMZM2G384327	870	2122	0.9491	83.2952
GRMZM2G061096	869	2608	0.8949	67.6953
GRMZM2G010054	867	4159	0.9281	42.3522
GRMZM2G168706	867	2351	0.9247	74.9226
GRMZM2G152041	867	817	0.9327	215.597
GRMZM2G115775	866	1449	0.8599	121.422
GRMZM2G169890	866	1546	0.6701	113.803
GRMZM2G107815	866	2175	0.9798	80.8919
GRMZM2G055575	865	1905	0.8814	92.2502
GRMZM2G068755	864	6523	0.92	26.9099
AC217358.3	862	1935	0.8408	90.505
GRMZM2G314133	862	5197	0.93	33.6977
GRMZM2G114182	861	4532	0.8383	38.5975
GRMZM2G077036	860	2455	0.9479	71.1694
GRMZM2G023387	860	1417	0.8659	123.303
GRMZM2G540538	860	1532	0.9543	114.048
GRMZM2G019267	860	2431	0.796	71.872
GRMZM2G042089	858	2160	0.9463	80.7012
GRMZM2G150367	857	1325	0.8747	131.405
GRMZM2G176307	854	2014	0.646	86.1479
GRMZM2G151087	854	1511	0.9226	114.826
GRMZM2G481440	853	1865	0.9887	92.9216
GRMZM2G004534	853	2241	0.9005	77.331
GRMZM2G173536	851	2166	0.8629	79.821
GRMZM2G077837	850	1564	0.8114	110.415
GRMZM2G127798	850	2594	0.7621	66.5726
GRMZM5G823855	849	991	0.9566	174.053
GRMZM2G089836	849	2608	0.9578	66.1373
GRMZM2G169688	849	2801	0.9332	61.5802
GRMZM2G170798	848	3858	0.8279	44.656
GRMZM2G316191	848	7924	0.8241	21.7419
GRMZM2G428391	848	2628	0.9212	65.5567
GRMZM2G365035	847	2003	0.9446	85.911
GRMZM2G146331	847	572	0.8182	300.839
GRMZM2G032049	846	3194	0.9396	53.8123
GRMZM2G110423	846	2152	0.9173	79.8683
GRMZM2G468260	846	2615	0.7977	65.7272
GRMZM2G066191	845	2140	0.7098	80.2212
GRMZM2G351018	844	4688	0.9029	36.5764
GRMZM2G089484	844	2581	0.9686	66.4356
GRMZM2G107757	844	1566	0.7478	109.496
GRMZM2G027049	844	3722	0.8447	46.0694
GRMZM2G033805	844	3211	0.9377	53.4009
GRMZM2G052434	842	2921	0.9699	58.5635
GRMZM2G127729	842	2848	0.9533	60.0646
GRMZM2G146697	841	3560	0.9652	47.9946
GRMZM2G063806	840	3409	0.9537	50.0609
GRMZM2G480002	840	5453	0.9652	31.2961
GRMZM2G066578	839	2489	0.9425	68.4831
GRMZM2G045987	839	3151	0.8981	54.0953
GRMZM2G162786	839	2585	0.9315	65.9398
GRMZM2G017525	838	1795	0.9159	94.8475
GRMZM2G111720	836	3993	0.8557	42.5357
GRMZM2G055970	836	1766	0.8935	96.1749
GRMZM2G149281	836	2058	0.6273	82.5291
AC235535.1	835	3342	0.9279	50.7606
GRMZM5G836182	835	1072	0.8675	158.248
GRMZM2G160316	835	2395	0.8956	70.8316
GRMZM2G084149	835	1880	0.9835	90.235
GRMZM2G127072	833	1505	0.8605	112.449
GRMZM2G004511	831	1443	0.7727	116.999
GRMZM2G071630	830	1696	0.8915	99.4257
GRMZM2G071172	830	3654	0.9267	46.1483
GRMZM2G157470	826	1673	0.9121	100.307
GRMZM2G088371	826	606	0.9323	276.92
GRMZM2G118355	824	1120	0.6562	149.471
GRMZM2G057441	824	3681	0.9046	45.4787
GRMZM2G006107	824	2983	0.9564	56.1203
GRMZM2G055585	823	1700	0.9929	98.3552
GRMZM2G052667	823	1919	0.8598	87.1307
GRMZM2G140590	823	2509	0.9366	66.6416
GRMZM2G370715	823	4703	0.9411	35.5526
GRMZM2G099337	822	5106	0.9681	32.7067
GRMZM2G072088	821	4033	0.9085	41.3582
GRMZM2G041258	821	890	0.9685	187.413
GRMZM2G014395	820	1976	0.8983	84.3089
GRMZM2G092451	820	2603	0.9055	64.0009
GRMZM5G830695	820	1942	0.8069	85.7849
GRMZM2G154489	819	2306	0.9337	72.1557
GRMZM2G088501	818	1511	0.906	109.985
GRMZM2G110509	816	1813	0.7066	91.4405
GRMZM5G826911	815	2219	0.8891	74.6185
GRMZM2G033356	815	2047	0.9287	80.8884
GRMZM2G156800	815	3512	0.7745	47.1465
GRMZM2G061099	814	2220	0.9455	74.4934
GRMZM2G159295	814	1759	0.9847	94.0167
GRMZM2G034362	813	3733	0.9858	44.2465
GRMZM2G071180	812	1764	0.8481	93.5198
GRMZM2G036609	812	5897	0.8896	27.9751
GRMZM2G157384	812	1514	0.8217	108.962
GRMZM2G109121	812	2357	0.9482	69.9911
GRMZM2G018375	812	1655	0.887	99.6792
GRMZM2G348909	811	2962	0.9784	55.6265
GRMZM2G400173	811	3783	0.9067	43.5543
GRMZM2G369839	811	924	0.8139	178.318
GRMZM2G000264	811	2152	0.7876	76.564
GRMZM2G166671	810	2778	0.951	59.2378
GRMZM2G038636	810	1630	0.8552	100.959
GRMZM2G017187	810	2579	0.955	63.8087
GRMZM2G174549	809	1863	0.693	88.223
GRMZM5G866843	809	2317	0.9918	70.9363
GRMZM2G082174	808	1994	0.9027	82.3251
GRMZM2G039455	808	3704	0.8925	44.3187
GRMZM2G007195	806	3057	0.8158	53.5656
GRMZM2G032409	806	2211	0.99	74.0615
GRMZM2G177828	804	769	0.8231	212.411
GRMZM2G085530	804	3503	0.8975	46.6297
GRMZM2G079308	804	2827	0.7089	57.7799
GRMZM2G080940	802	2142	0.8618	76.0679
GRMZM2G045976	802	1831	0.9498	88.9882
GRMZM5G802801	802	2186	0.9909	74.5368
GRMZM2G106650	801	1952	0.8069	83.3679
GRMZM2G038401	800	3100	0.8481	52.4294
GRMZM2G017013	800	2415	0.742	67.3006
GRMZM2G318475	799	1400	0.8786	115.948
GRMZM2G387076	799	1646	0.3913	98.6196
GRMZM5G855347	799	3395	0.6227	47.8138
GRMZM2G179024	798	2524	0.9156	64.2332
GRMZM2G019919	798	2910	0.9859	55.713
GRMZM2G079823	798	2709	0.9982	59.8467
GRMZM2G110922	797	1656	0.8551	97.7787
GRMZM2G063851	797	2313	0.8591	70.005
GRMZM2G147884	796	3823	0.6181	42.3014
GRMZM2G061562	796	3776	0.9327	42.828
GRMZM2G374574	796	6139	0.9363	26.3428
GRMZM2G011483	795	3743	0.906	43.1513
GRMZM2G375984	795	2538	0.9173	63.6388
GRMZM2G053898	795	1061	0.7116	152.229
GRMZM2G035465	795	1712	0.972	94.343
GRMZM2G071620	794	1784	0.7321	90.4216
GRMZM2G042040	794	2491	0.4316	64.7579
GRMZM2G063850	794	2761	0.8356	58.4252
GRMZM2G166658	793	2272	0.8732	70.9106
GRMZM2G144653	793	771	0.9611	208.961
GRMZM2G010941	792	2219	0.9644	72.5127
GRMZM5G813206	792	4110	0.9448	39.1498
GRMZM2G354610	791	2247	0.9088	71.5187
GRMZM2G004183	791	1938	0.8328	82.9219
GRMZM2G052435	790	3891	0.9514	41.2489
GRMZM2G027862	790	1374	0.8843	116.812
GRMZM5G882708	790	2295	0.8523	69.9344
AC233959.1	789	984	0.9949	162.903
GRMZM2G143651	789	2232	0.6891	71.8173
GRMZM2G467169	788	3479	0.9661	46.017
AC149475.2	788	4569	0.7389	35.039
GRMZM2G041275	788	2276	0.938	70.3397
GRMZM5G889999	788	2930	0.941	54.6393
GRMZM2G066496	788	1463	0.9077	109.428
GRMZM2G081462	787	2113	0.778	75.6696
GRMZM2G134917	787	1791	0.7984	89.2741
GRMZM5G850966	786	596	0.9379	267.931
GRMZM2G098819	785	1452	0.7906	109.837
GRMZM2G173747	784	948	0.8639	168.017
GRMZM2G132303	784	1915	0.7384	83.1751
GRMZM2G395354	783	1258	0.8816	126.453
GRMZM2G176253	783	2250	0.8653	70.701
AC217050.4	783	2667	0.3641	59.6465
GRMZM2G050647	782	3770	0.9289	42.1417
GRMZM2G012041	782	3955	0.9848	40.1704
AC207342.3	782	1029	0.999	154.397
GRMZM2G101859	782	913	0.8697	174.013
GRMZM2G127756	781	2503	0.9377	63.3923
GRMZM2G175562	780	1568	0.8138	101.064
GRMZM2G080871	780	2388	0.6198	66.36
AC233893.1	780	2349	0.3959	67.4618
AC198481.3	780	2736	0.9828	57.9195
GRMZM2G424053	779	1208	0.7334	131.014
GRMZM2G431243	779	3165	0.8645	50.0046
GRMZM2G178106	778	2430	0.9189	65.0459
GRMZM2G073498	777	2231	0.8844	70.7567
GRMZM2G055936	776	866	0.8326	182.05
GRMZM2G042101	776	1203	0.9343	131.052
GRMZM2G091715	774	868	0.7143	181.162
GRMZM2G055698	774	1882	0.6243	83.5541
GRMZM2G155111	774	3487	0.8847	45.0957
GRMZM2G121683	773	2585	0.8402	60.7527
GRMZM2G079089	773	1409	0.6253	111.459
GRMZM2G142315	773	1298	0.9961	120.99
GRMZM2G060213	773	3967	0.9342	39.588
GRMZM2G335521	772	1015	0.9123	154.525
GRMZM2G458549	772	2186	0.8079	71.7486
GRMZM2G083437	772	3274	0.9829	47.9055
GRMZM2G003385	772	2321	0.7859	67.5754
GRMZM2G025992	772	1570	0.7102	99.8996
GRMZM2G099657	772	1683	0.7534	93.1922
GRMZM2G022061	772	2476	0.9184	63.3451
GRMZM2G128641	771	3041	0.929	51.5091
GRMZM5G887631	770	2793	0.9116	56.0101
GRMZM2G478709	770	2407	0.9152	64.9922
GRMZM2G090300	768	2144	0.9146	72.7751
GRMZM2G079668	768	2963	0.8191	52.6594
GRMZM2G157061	767	3109	0.9492	50.1211
AC217401.3	767	2060	0.915	75.644
GRMZM2G147243	766	2320	0.8099	67.0791
GRMZM2G176465	766	4063	0.9151	38.3026
GRMZM2G013114	766	3335	0.9466	46.6637
GRMZM2G097116	765	1699	0.3337	91.4775
GRMZM2G157027	765	2395	0.985	64.8937
GRMZM2G130889	765	2503	0.8214	62.0936
GRMZM2G147191	764	2433	0.9778	63.7966
GRMZM2G406101	764	2952	0.8757	52.5803
GRMZM2G160626	763	1583	0.487	97.9242
AC233895.1	763	1185	0.9823	130.813
GRMZM2G147145	762	2412	0.8433	64.1836
GRMZM2G075333	762	2235	0.9682	69.2666
GRMZM2G159908	761	1951	0.8519	79.2453
GRMZM2G314546	761	5264	0.8961	29.3708
GRMZM5G809587	761	2208	0.8573	70.0216
GRMZM2G057935	761	4151	0.9301	37.2459
GRMZM2G451314	761	1922	0.9048	80.441
GRMZM2G078985	760	1444	0.7154	106.928
GRMZM2G008507	760	3303	0.9355	46.7467
GRMZM2G012319	760	4260	0.8195	36.2452
GRMZM2G397242	760	861	0.8873	179.332
GRMZM2G080274	760	1108	0.7825	139.354
GRMZM2G151193	760	1785	0.8807	86.5011
GRMZM2G141931	760	2842	0.8691	54.3295
GRMZM2G139073	759	1449	0.9331	106.419
GRMZM2G144146	758	2282	0.9566	67.4839
GRMZM2G040441	758	2304	0.8932	66.8395
AC155434.2	758	5208	0.9363	29.5695
GRMZM2G062076	757	1304	0.7577	117.941
GRMZM2G305027	757	1101	0.8202	139.687
GRMZM2G029583	756	1943	0.876	79.0488
GRMZM2G398288	756	4521	0.9772	33.973
GRMZM2G420882	756	2963	0.9619	51.8366
GRMZM2G469795	755	4935	0.9848	31.0818
GRMZM2G175273	755	646	0.9783	237.444
GRMZM5G874500	755	2113	0.9356	72.5928
GRMZM2G000622	753	4869	0.9657	31.4197
GRMZM2G147854	753	2118	0.8782	72.2296
GRMZM2G082823	753	3121	0.9061	49.0171
GRMZM2G070659	753	1836	0.6852	83.3237
GRMZM2G069009	753	2360	0.9097	64.823
GRMZM2G040477	752	1473	0.8955	103.72
GRMZM2G145854	752	2868	0.9031	53.2703
GRMZM2G078500	751	1420	0.9725	107.448
GRMZM2G131943	750	2532	0.9084	60.1788
GRMZM2G002898	750	2176	0.8088	70.0243
GRMZM2G136170	749	3099	0.9945	49.1028
GRMZM2G098076	749	2352	0.9702	64.698
GRMZM2G474798	749	8784	0.8693	17.3235
GRMZM2G165679	749	1262	0.9802	120.578
GRMZM2G028313	749	2249	0.9289	67.661
GRMZM2G151195	748	3905	0.9823	38.9159
GRMZM2G018508	748	3684	0.9221	41.2504
GRMZM2G143354	747	2108	0.9402	71.994
GRMZM2G139513	747	756	0.836	200.745
GRMZM2G334457	747	3958	0.9217	38.3434
GRMZM2G152686	747	2231	0.9426	68.0248
GRMZM2G081652	745	2425	0.9167	62.4153
GRMZM2G324973	745	3300	0.6939	45.8658
GRMZM2G176209	743	2100	0.8957	71.8813
AC215244.3	743	1558	0.9551	96.8875
GRMZM2G041448	742	501	0.9202	300.893
GRMZM2G125893	741	935	0.877	161.01
GRMZM2G044143	740	8574	0.9138	17.5345
GRMZM2G353497	740	1612	0.6414	93.2638
GRMZM5G871143	738	3296	0.8701	45.49
GRMZM5G806358	737	5464	0.6686	27.4033
GRMZM2G102760	737	3292	0.8949	45.4835
GRMZM2G069676	737	2327	0.9691	64.3454
GRMZM2G001652	735	3697	0.9061	40.391
GRMZM2G469111	735	2745	0.9505	54.399
GRMZM2G109425	735	2079	0.9827	71.8256
GRMZM2G140917	734	3453	0.9687	43.1863
GRMZM2G462325	734	4113	0.6579	36.2563
GRMZM2G099167	734	1984	0.8967	75.1624
GRMZM2G019328	734	1089	0.7888	136.935
AC205502.4	731	1614	0.8463	92.0153
GRMZM2G044132	731	1451	0.0358	102.352
GRMZM2G137713	731	2736	0.9781	54.281
GRMZM5G820122	730	3366	0.9079	44.0611
GRMZM2G397247	730	3899	0.8625	38.0378
GRMZM2G082529	729	3126	0.9645	47.3789
GRMZM2G116557	729	3212	0.9212	46.1103
GRMZM2G064541	729	2296	0.9621	64.5063
GRMZM2G044498	729	1310	0.9107	113.058
GRMZM2G079777	728	1497	0.9312	98.7998
GRMZM2G010909	728	1199	0.8691	123.355
GRMZM2G055960	727	3427	0.827	43.0989
GRMZM2G102596	727	1403	0.779	105.274
GRMZM2G142088	726	3013	0.9127	48.9535
GRMZM2G013236	726	2258	0.8468	65.3219
AC210013.4	725	1890	0.8328	77.9332
GRMZM2G091338	725	1865	0.8643	78.9779
GRMZM2G100620	725	1504	0.7806	97.9347
GRMZM2G139407	725	1965	0.9664	74.9586
GRMZM2G153615	725	2557	0.8181	57.6041
GRMZM2G415846	725	2276	0.9925	64.7161
GRMZM2G138419	725	3753	0.9574	39.2469
AC234152.1	725	2337	0.9337	63.0268
GRMZM2G020840	725	1576	0.7214	93.4605
GRMZM2G322024	724	5538	0.9151	26.5602
GRMZM5G813627	723	2417	0.9127	60.7726
GRMZM5G860761	722	900	0.9622	162.983
GRMZM2G164956	722	3725	0.6301	39.3783
GRMZM2G054136	722	1362	0.7687	107.698
GRMZM2G151122	721	2272	0.783	64.4723
GRMZM5G811797	721	2095	0.8888	69.9194
GRMZM2G144995	720	2067	0.8689	70.7682
GRMZM2G057000	720	3182	0.7052	45.9704
GRMZM2G146951	720	2476	0.9576	59.0783
GRMZM2G164352	719	2271	0.974	64.3218
GRMZM2G169095	719	2569	0.8988	56.8606
GRMZM2G119361	719	2728	0.9743	53.5465
GRMZM2G004703	718	1069	0.7605	136.456
GRMZM2G117836	717	3418	0.8675	42.618
GRMZM2G051792	716	3803	0.9206	38.2501
GRMZM2G012160	716	1711	0.5137	85.0177
GRMZM2G026892	715	2122	0.8082	68.4553
GRMZM2G134628	715	2629	0.8798	55.2537
GRMZM2G100511	715	2349	0.8706	61.84
GRMZM2G155954	714	2178	0.927	66.6019
GRMZM2G018941	713	916	0.9159	158.139
GRMZM2G410479	713	5510	0.9074	26.2896
GRMZM2G100146	713	1366	0.8609	106.044
GRMZM2G144971	713	5683	0.9344	25.4893
GRMZM5G871013	713	1307	0.6894	110.831
GRMZM2G159032	713	1410	0.8936	102.735
GRMZM2G117870	712	3838	0.8913	37.6896
GRMZM2G130868	712	2188	0.8793	66.1118
GRMZM5G840002	711	1212	0.8894	119.183
GRMZM2G103430	711	2032	0.9631	71.0873
GRMZM2G132060	711	2327	0.8621	62.0754
GRMZM2G106906	711	1157	0.8496	124.848
GRMZM2G145104	710	3715	0.8872	38.8281
GRMZM2G303374	710	1992	0.3027	72.4128
GRMZM2G130558	709	2024	0.7268	71.1676
GRMZM2G104025	709	1394	0.642	103.331
GRMZM2G012416	707	1960	0.8806	73.2841
GRMZM2G138676	707	2523	0.8514	56.931
GRMZM2G366392	706	2055	0.8774	69.7974
GRMZM2G133400	706	1394	0.7582	102.894
GRMZM2G180732	705	2813	0.9044	50.9173
AC233910.1	705	2253	0.107	63.5732
GRMZM2G084958	705	1581	0.8476	90.5949
GRMZM2G162992	705	2577	0.9197	55.5803
GRMZM2G034025	704	7747	0.9459	18.4623
GRMZM2G467007	704	2721	0.6961	52.5642
GRMZM2G007708	704	746	0.9745	191.726
GRMZM2G030016	703	1145	0.7834	124.737
GRMZM2G025074	703	2296	0.9721	62.2056
GRMZM5G863596	702	3138	0.8875	45.4496
GRMZM2G095895	701	721	0.9001	197.528
GRMZM2G048455	701	2038	0.8229	69.8812
GRMZM2G361605	700	3997	0.7908	35.5803
GRMZM5G824600	699	1867	0.7477	76.064
GRMZM2G119175	699	2149	0.8464	66.0826
GRMZM2G114793	699	2352	0.8346	60.379
GRMZM2G154366	699	4384	0.9496	32.3931
GRMZM2G164418	699	3041	0.9434	46.6989
GRMZM2G108509	698	2951	0.9698	48.0543
GRMZM2G054050	698	2361	0.9657	60.0628
GRMZM2G007871	698	2375	0.9352	59.7088
GRMZM2G146292	698	5169	0.9673	27.4344
GRMZM2G112456	698	2726	0.8426	52.0207
GRMZM2G125728	697	2633	0.9301	53.7809
GRMZM2G169820	697	3885	0.8963	36.4492
GRMZM2G056569	697	1734	0.9325	81.6639
GRMZM5G892645	696	2111	0.873	66.9834
GRMZM2G013890	696	3239	0.8805	43.6561
GRMZM2G341747	695	3552	0.9755	39.7519
GRMZM2G389768	695	1715	0.7242	82.3317
GRMZM2G001457	695	2993	0.9666	47.1764
GRMZM2G401869	695	6555	0.8967	21.5406
GRMZM2G092129	694	2044	0.9843	68.9803
GRMZM2G164562	694	1671	0.9629	84.378
GRMZM2G328988	694	5489	0.8246	25.687
GRMZM2G393334	693	2871	0.7342	49.0395
GRMZM2G033570	693	2707	0.9335	52.0105
GRMZM2G031360	693	4806	0.6504	29.2952
GRMZM2G099187	692	2931	0.6523	47.9663
GRMZM2G168629	692	4460	0.8491	31.5223
GRMZM2G109383	692	2445	0.8618	57.5008
GRMZM2G144726	692	2513	0.7493	55.9448
GRMZM2G049347	692	2142	0.9444	65.6346
GRMZM2G133919	691	4190	0.5986	33.5051
GRMZM2G141679	691	2178	0.8871	64.4565
GRMZM2G058305	690	2479	0.6543	56.5482
GRMZM5G886913	689	1421	0.9374	98.508
GRMZM2G147377	688	2931	0.8813	47.6891
GRMZM2G141258	688	6058	0.8955	23.0731
GRMZM2G060611	688	3205	0.892	43.6121
GRMZM2G000052	687	2411	0.9179	57.8903
GRMZM2G113928	687	2394	0.878	58.3014
GRMZM2G165433	687	2841	0.9472	49.1283
GRMZM2G034083	687	1782	0.904	78.3241
GRMZM2G139977	686	6022	0.9155	23.1435
GRMZM2G151992	686	1442	0.9508	96.6507
GRMZM2G351125	685	4361	0.9248	31.9118
GRMZM2G178618	685	3115	0.9676	44.6765
GRMZM2G100242	685	5158	0.9554	26.9808
GRMZM2G170400	685	2232	0.9615	62.3509
GRMZM2G067042	685	238	0.9496	584.736
GRMZM2G036034	683	3563	0.7749	38.945
GRMZM2G027886	683	1965	0.8712	70.6162
GRMZM2G016894	683	2357	0.8333	58.8718
GRMZM2G033876	683	4308	0.955	32.21
GRMZM2G035268	683	2031	0.9675	68.3215
GRMZM2G145396	682	1906	0.6306	72.6955
GRMZM2G155837	681	3727	0.8425	37.1222
GRMZM2G148709	681	2304	0.8906	60.0497
GRMZM2G145175	681	1538	0.855	89.9574
GRMZM2G176698	681	4892	0.851	28.2818
GRMZM2G007587	680	2124	0.8842	65.043
GRMZM2G032252	680	2592	0.8951	53.2991
GRMZM2G352159	680	3181	0.951	43.4302
GRMZM2G171430	680	2039	0.5802	67.7545
GRMZM2G152703	679	1352	0.7337	102.033
GRMZM2G412899	679	2176	0.9899	63.3953
GRMZM2G392320	679	2659	0.859	51.8797
GRMZM2G128914	679	2253	0.8793	61.2287
GRMZM2G068217	679	4719	0.9777	29.2325
GRMZM2G016447	678	1708	0.8472	80.647
GRMZM2G146551	678	1175	0.3166	117.23
GRMZM5G825524	678	2906	0.9453	47.4002
GRMZM2G362883	678	1814	0.9625	75.9344
GRMZM2G039263	677	2051	0.9434	67.0609
GRMZM2G093119	677	4243	0.9144	32.4162
GRMZM2G126290	677	2651	0.9261	51.883
GRMZM2G071021	676	2027	0.8416	67.7547
GRMZM2G001327	676	2595	0.4173	52.9244
GRMZM2G009464	676	2224	0.8916	61.753
GRMZM2G005552	676	1385	0.9805	99.1615
GRMZM2G165511	675	1598	0.6746	85.817
GRMZM2G018126	675	2404	0.9339	57.0447
GRMZM2G014180	675	2022	0.9233	67.8217
GRMZM2G472346	674	1869	0.8791	73.2651
GRMZM2G073954	674	2635	0.9317	51.9668
GRMZM2G139517	674	721	0.9445	189.92
GRMZM2G456570	674	4635	0.7808	29.5431
GRMZM2G079013	673	3062	0.9357	44.6536
GRMZM2G086030	673	5637	0.8157	24.2557
GRMZM2G098569	672	1568	0.9458	87.0702
GRMZM2G160237	672	2146	0.8262	63.6189
GRMZM2G055209	672	3663	0.9459	37.2717
GRMZM2G071970	672	2111	0.9199	64.6736
GRMZM2G163059	672	2977	0.9657	45.8603
GRMZM2G001514	672	2114	0.5979	64.5819
GRMZM2G140867	671	1385	0.8765	98.4281
GRMZM2G054300	671	2013	0.5917	67.7213
GRMZM2G060940	671	1415	0.9357	96.3413
GRMZM2G009655	671	3548	0.9614	38.4225
GRMZM2G407249	671	1720	0.3174	79.2575
GRMZM2G133396	671	2315	0.9011	58.8868
GRMZM2G412611	671	4688	0.9217	29.0791
GRMZM2G073912	670	2612	0.8603	52.1132
GRMZM2G167149	670	1052	0.9506	129.391
GRMZM2G092311	670	1216	0.8931	111.941
GRMZM2G019121	669	2159	0.8763	62.9535
GRMZM2G156320	669	1992	0.9724	68.2312
GRMZM2G152877	668	2942	0.9867	46.1296
GRMZM2G316967	668	3804	0.9369	35.6765
GRMZM2G138907	668	1809	0.8955	75.0212
AC149829.2	667	3075	0.8104	44.0684
GRMZM2G161913	667	4021	0.91	33.7006
GRMZM2G057186	667	2184	0.8961	62.0468
GRMZM2G342327	666	2779	0.9018	48.6891
GRMZM2G345840	666	2795	0.9875	48.4104
GRMZM2G107984	666	2324	0.892	58.2216
GRMZM2G339336	666	1322	0.9349	102.35
GRMZM2G074436	665	1815	0.8848	74.4374
GRMZM2G123537	665	3884	0.9614	34.7847
GRMZM2G023652	664	1932	0.9612	69.8244
GRMZM2G363535	664	5101	0.9555	26.4459
GRMZM2G057380	664	4903	0.8666	27.5139
GRMZM2G046459	664	2494	0.7666	54.0901
GRMZM2G118462	664	3644	0.8856	37.02
GRMZM2G394259	663	2278	0.1826	59.1298
GRMZM2G178227	663	2042	0.6763	65.9636
GRMZM2G175272	663	1271	0.8977	105.978
GRMZM2G005947	663	2167	0.7296	62.1586
GRMZM2G057402	662	8637	0.9027	15.5719
GRMZM2G133937	661	5468	0.9393	24.5595
GRMZM2G114675	661	2222	0.9347	60.4371
GRMZM2G347583	661	4955	0.9395	27.1022
GRMZM2G122135	660	2270	0.9348	59.0696
GRMZM2G541193	660	2664	0.9621	50.3334
GRMZM2G176396	660	1721	0.7914	77.9129
GRMZM2G126749	660	2062	0.9583	65.0282
GRMZM2G042171	660	2650	0.9128	50.5993
GRMZM5G821988	659	2262	0.9819	59.1887
GRMZM2G145280	659	1036	0.8485	129.233
GRMZM2G041770	659	4484	0.8733	29.8584
GRMZM2G137236	659	3916	0.8442	34.1892
GRMZM2G002416	659	1705	0.8528	78.5249
GRMZM2G103079	657	5403	0.9767	24.7045
GRMZM2G077757	656	2464	0.9643	54.0891
GRMZM2G031846	656	2665	0.9159	50.0095
GRMZM2G049141	654	6055	0.9503	21.9437
GRMZM5G815009	654	1074	0.8929	123.714
GRMZM2G007151	654	968	0.9494	137.261
GRMZM2G164674	653	2326	0.9815	57.0361
GRMZM5G800014	653	1223	0.8128	108.476
GRMZM2G081188	652	2491	0.9522	53.1766
GRMZM2G130425	652	2467	0.8784	53.6939
GRMZM2G126361	652	2674	0.8818	49.5373
GRMZM2G167031	652	3671	0.8984	36.0836
GRMZM2G165747	652	2834	0.9248	46.7406
GRMZM2G315769	652	4267	0.8702	31.0435
GRMZM2G439950	652	3536	0.9197	37.4612
GRMZM2G074585	651	1320	0.7341	100.197
GRMZM2G027955	651	2538	0.8479	52.1118
GRMZM2G145972	651	2311	0.9208	57.2305
GRMZM2G177659	650	2126	0.9219	62.115
GRMZM2G166873	650	2900	0.97	45.5367
GRMZM2G054152	650	2292	0.9241	57.6163
GRMZM2G046846	650	2814	0.9367	46.9284
GRMZM5G804783	650	2116	0.9433	62.4085
GRMZM2G106960	649	1415	0.7392	93.1825
GRMZM2G114459	649	7418	0.882	17.7748
GRMZM2G105004	649	3979	0.8329	33.1373
GRMZM2G113062	648	1875	0.8629	70.2134
GRMZM2G141784	648	1796	0.9577	73.3019
GRMZM2G041050	647	2626	0.9566	50.056
GRMZM2G175818	647	1364	0.8746	96.3687
GRMZM2G001191	647	2619	0.9855	50.1898
GRMZM2G432801	646	2983	0.6564	43.9973
GRMZM2G013457	646	649	0.9723	202.225
GRMZM2G140339	646	1707	0.9854	76.8857
GRMZM2G031352	645	3352	0.8135	39.0933
AC234515.1	645	1335	0.9843	98.1578
GRMZM2G093359	645	1828	0.9004	71.6853
GRMZM2G105787	644	2176	0.8428	60.1275
GRMZM2G179981	643	1451	0.8815	90.0305
GRMZM2G177781	643	2587	0.9671	50.4964
GRMZM2G132991	643	4056	0.9512	32.2077
GRMZM2G374065	643	2874	0.9767	45.4538
GRMZM2G410991	643	2132	0.6037	61.2731
GRMZM2G153274	643	3797	0.6663	34.4046
GRMZM5G835704	643	1198	0.9482	109.044
GRMZM2G029029	642	1575	0.8533	82.8134
GRMZM2G079908	642	866	0.6478	150.613
GRMZM2G079661	641	1504	0.6403	86.5878
GRMZM2G172932	640	1876	0.7207	69.3096
GRMZM2G046924	639	1861	0.7792	69.7591
GRMZM2G097249	639	3600	0.9769	36.0616
GRMZM2G120816	639	3036	0.7434	42.7608
GRMZM2G016189	639	1636	0.9254	79.3531
GRMZM2G118345	639	2934	0.8214	44.2473
GRMZM2G448607	638	1365	0.8652	94.9586
GRMZM2G022632	638	2166	0.8126	59.8423
GRMZM2G102845	637	4127	0.913	31.3582
GRMZM2G363813	637	2486	0.9023	52.0577
GRMZM2G129238	637	2067	0.9289	62.6102
GRMZM2G052078	637	4930	0.9369	26.2506
GRMZM2G146589	636	2585	0.877	49.9854
GRMZM2G084521	636	1433	0.6553	90.169
GRMZM2G073814	635	2378	0.8953	54.2511
GRMZM2G021069	635	3028	0.9264	42.6054
GRMZM2G139041	634	2318	0.8438	55.5677
GRMZM2G022777	634	2505	0.6882	51.4195
GRMZM2G083176	634	2698	0.8358	47.7412
GRMZM5G863385	634	2643	0.9281	48.7347
GRMZM2G142802	634	1233	0.9408	104.465
GRMZM2G071844	634	1660	0.8458	77.5939
GRMZM2G373522	633	1356	0.8916	94.8397
GRMZM2G179301	633	1901	0.5986	67.65
GRMZM2G464782	632	1828	0.9251	70.2404
GRMZM2G105364	630	1614	0.5589	79.3019
GRMZM2G150932	630	2365	0.849	54.1197
GRMZM2G061447	629	1806	0.8843	70.7586
GRMZM2G132898	629	1390	0.8755	91.9353
GRMZM2G026065	629	2419	0.8913	52.8276
GRMZM2G169671	629	1287	0.8664	99.2929
GRMZM2G155709	628	2806	0.8746	45.4693
GRMZM2G351417	628	1414	0.8819	90.2312
GRMZM2G173738	628	1337	0.9379	95.4277
GRMZM2G157621	628	3654	0.858	34.917
GRMZM2G140726	628	2879	0.9007	44.3164
GRMZM2G036921	628	1286	0.9277	99.2122
GRMZM2G137409	628	2877	0.8752	44.3472
GRMZM2G133621	627	2403	0.9147	53.0103
GRMZM2G333811	627	1689	0.9124	75.4196
GRMZM2G145905	626	3002	0.9787	42.3653
GRMZM2G558539	626	1582	0.8748	80.3922
GRMZM2G113232	626	4603	0.9398	27.6299
GRMZM2G134708	625	1996	0.8652	63.6159
GRMZM2G344967	625	6776	0.9361	18.7393
GRMZM2G162426	625	3685	0.9075	34.4579
GRMZM2G342515	624	1161	0.6744	109.194
GRMZM2G126682	624	1880	0.8293	67.4331
AC148167.6	624	1761	0.9216	71.9899
GRMZM5G829778	623	1660	0.8988	76.2476
GRMZM2G064163	623	1741	0.7944	72.7002
GRMZM2G179432	622	1560	0.9288	81.005
GRMZM2G123519	622	1879	0.9415	67.2527
GRMZM2G017941	622	1469	0.8523	86.0231
GRMZM2G090087	621	2132	0.9409	59.1767
GRMZM2G010987	621	2072	0.8904	60.8903
GRMZM2G108076	621	1145	0.6873	110.188
GRMZM2G083459	620	1995	0.8827	63.1386
GRMZM2G056014	620	3762	0.9442	33.4826
GRMZM2G079538	620	2255	0.7809	55.8588
GRMZM2G017624	620	2764	0.9656	45.5722
GRMZM2G139223	620	1910	0.9435	65.9485
GRMZM5G830874	620	3098	0.9338	40.659
GRMZM2G000278	620	1759	0.909	71.6097
GRMZM2G075900	620	3569	0.9101	35.2932
GRMZM2G090584	619	2011	0.8424	62.5352
AC197705.4	619	2895	0.6114	43.4399
GRMZM2G063617	619	1031	0.5858	121.977
GRMZM2G335052	619	3266	0.8674	38.5053
AC205419.3	619	3099	0.9968	40.5803
GRMZM5G897958	618	2311	0.9381	54.3294
GRMZM2G443985	618	3251	0.7604	38.6205
GRMZM2G168762	618	1331	0.9497	94.3315
GRMZM2G107696	618	3900	0.6633	32.1936
GRMZM2G026793	618	1716	0.8677	73.1674
GRMZM2G021194	617	2978	0.8516	42.0927
GRMZM2G100913	617	2297	0.9552	54.5721
GRMZM2G464754	616	7329	0.8592	17.0758
GRMZM2G035017	616	1469	0.6215	85.1933
GRMZM2G036464	616	1629	0.903	76.8256
GRMZM2G119852	615	3615	0.5087	34.5631
GRMZM2G172258	615	2617	0.9465	47.7439
GRMZM2G070323	614	3627	0.8558	34.3928
GRMZM2G176735	614	3472	0.97	35.9282
GRMZM2G079196	614	1679	0.9684	74.2958
GRMZM2G099630	613	3835	0.9484	32.4744
GRMZM2G157115	613	1998	0.9184	62.332
GRMZM2G085568	613	2415	0.6865	51.5691
GRMZM5G840560	613	2306	0.9775	54.0067
GRMZM5G881775	613	2107	0.5553	59.1075
GRMZM2G086887	613	2688	0.8557	46.3316
GRMZM5G825854	613	2735	0.9931	45.5354
GRMZM2G007404	612	1817	0.65	68.4294
GRMZM2G178892	612	2190	0.9338	56.7745
GRMZM2G113409	612	3239	0.9376	38.3872
GRMZM2G399901	612	2147	0.8295	57.9116
GRMZM2G330024	612	5156	0.8894	24.1149
GRMZM2G460396	612	4396	0.7932	28.2839
GRMZM5G884242	611	1744	0.4192	71.1772
GRMZM2G404897	611	2333	0.8474	53.2075
GRMZM2G155123	611	3632	0.9339	34.1776
AC196426.3	611	2235	0.9714	55.5405
AC231745.1	611	2796	0.6119	44.3967
GRMZM2G003883	611	1994	0.9162	62.2533
GRMZM2G091119	610	2331	0.9339	53.166
GRMZM2G025387	609	2055	0.9358	60.2077
GRMZM2G004927	609	1212	0.9868	102.085
GRMZM2G093347	609	1007	0.9414	122.867
GRMZM2G146267	608	4485	0.8687	27.5415
GRMZM2G082185	608	1680	0.8202	73.5259
GRMZM2G033130	608	3621	0.7584	34.1131
GRMZM2G085747	608	2863	0.8592	43.1448
GRMZM2G129777	608	1846	0.9177	66.9142
GRMZM2G358827	608	3647	0.8149	33.8699
GRMZM2G009443	607	3270	0.9245	37.7127
GRMZM2G315199	607	1771	0.9836	69.6332
GRMZM2G050364	607	1907	0.958	64.6672
GRMZM2G122666	607	1444	0.8061	85.402
GRMZM2G028929	607	1571	0.7562	78.498
GRMZM2G416308	607	2507	0.8855	49.1904
GRMZM2G061230	607	1929	0.886	63.9297
GRMZM2G401050	607	3148	0.81	39.1742
GRMZM2G109821	606	3109	0.3631	39.6003
GRMZM2G105770	606	3708	0.8975	33.2031
GRMZM2G349791	606	1407	0.973	87.5034
GRMZM2G073622	606	1038	0.7871	118.61
GRMZM2G425482	606	1193	0.9623	103.2
GRMZM5G899349	606	2086	0.9468	59.0207
GRMZM2G066867	605	2056	0.8482	59.7831
GRMZM2G168858	605	2830	0.8375	43.4325
GRMZM2G063657	605	3523	0.9245	34.889
GRMZM2G071883	604	3014	0.9555	40.7136
GRMZM2G021110	604	1918	0.8858	63.9786
GRMZM2G071015	604	2465	0.7963	49.7813
GRMZM2G130440	604	1915	0.9687	64.0788
GRMZM2G116126	604	4609	0.9575	26.6242
GRMZM2G157019	604	1319	0.7824	93.0333
GRMZM2G330218	603	3956	0.9654	30.9676
GRMZM2G178756	603	2281	0.9513	53.7079
GRMZM2G052890	603	1287	0.9736	95.1886
GRMZM2G096486	602	1265	0.9012	96.6835
GRMZM2G175642	602	1805	0.949	67.7588
GRMZM5G891159	601	4616	0.8585	26.4518
GRMZM2G137676	601	2307	0.9701	52.9265
GRMZM2G177263	601	1661	0.8459	73.5108
GRMZM2G387890	601	3148	0.9463	38.787
GRMZM2G071441	601	3471	0.86	35.1776
GRMZM2G046900	601	1832	0.6032	66.6493
GRMZM2G172101	600	4279	0.7626	28.4876
GRMZM2G087245	600	1088	0.8438	112.039
GRMZM2G119894	600	4676	0.83	26.0689
GRMZM2G010406	600	1912	0.9059	63.7543
GRMZM2G009871	600	2200	0.9618	55.4083
GRMZM2G157332	600	2068	0.7466	58.945
GRMZM2G426591	599	2063	0.8958	58.9894
GRMZM2G015238	599	2653	0.9412	45.8708
GRMZM2G055489	598	1757	0.9271	69.1474
GRMZM2G119930	597	1935	0.893	62.6815
GRMZM2G000923	597	1093	0.9213	110.969
GRMZM2G104373	597	1764	0.9065	68.7578
GRMZM2G321753	596	7094	0.9323	17.0687
GRMZM2G437119	596	2247	0.8184	53.8877
GRMZM2G057450	596	2114	0.9054	57.278
GRMZM2G031859	596	3239	0.9213	37.3836
AC205122.4	596	2268	0.0216	53.3887
GRMZM2G126507	596	1965	0.8931	61.6212
GRMZM2G408768	596	1413	0.6405	85.694
GRMZM2G127308	596	2460	0.9894	49.2218
GRMZM2G044457	596	2071	0.8083	58.4672
GRMZM2G176707	595	2125	0.7944	56.8859
GRMZM2G046841	595	1354	0.6256	89.278
GRMZM2G155836	595	1304	0.7615	92.7013
GRMZM2G025860	595	4070	0.8988	29.7008
GRMZM2G369939	594	2194	0.9553	55.0042
GRMZM2G087192	593	1571	0.9637	76.6875
GRMZM2G000531	593	1607	0.8687	74.9696
GRMZM2G142863	593	3966	0.8492	30.3772
GRMZM2G433959	592	1171	0.8395	102.71
GRMZM2G063949	592	1708	0.9245	70.4174
GRMZM2G139617	591	2195	0.8547	54.7015
GRMZM2G071327	591	976	0.8709	123.022
GRMZM2G121022	590	2416	0.9387	49.6137
GRMZM2G031824	590	2157	0.9713	55.571
GRMZM2G126922	589	1343	0.857	89.1016
GRMZM2G009936	589	1048	0.6212	114.183
GRMZM2G110185	588	1844	0.9051	64.7832
GRMZM2G097533	588	2391	0.7499	49.9625
GRMZM2G059836	586	831	0.9001	143.266
GRMZM2G350447	586	5927	0.9052	20.0867
GRMZM2G063688	585	3459	0.7213	34.3599
GRMZM2G077181	585	2908	0.8807	40.8703
GRMZM2G017654	585	4440	0.9459	26.7682
GRMZM2G132866	585	2242	0.7788	53.0111
GRMZM2G136508	585	2539	0.8161	46.8101
GRMZM2G051270	585	1993	0.6337	59.6341
GRMZM2G054162	585	4060	0.8931	29.2736
GRMZM2G011101	584	3347	0.9328	35.449
GRMZM2G375807	584	3258	0.9331	36.4173
GRMZM2G115674	584	1891	0.9048	62.7433
GRMZM2G054821	584	3397	0.8973	34.9272
GRMZM2G553314	584	2542	0.9437	46.6749
GRMZM2G410393	584	6466	0.6848	18.3495
GRMZM2G369912	584	2918	0.6892	40.6606
GRMZM2G077541	582	1767	0.8732	66.9164
GRMZM2G176903	582	1431	0.9245	82.6285
GRMZM2G064993	582	1345	0.9688	87.9118
GRMZM2G030463	582	2858	0.9171	41.3721
GRMZM2G073571	582	2496	0.8526	47.3723
GRMZM2G152862	582	1923	0.7977	61.4879
GRMZM2G166659	582	1831	0.5751	64.5775
GRMZM2G124239	581	2806	0.8828	42.0663
GRMZM2G138268	581	1812	0.7632	65.1425
GRMZM2G152421	580	2024	0.7742	58.2189
GRMZM2G153263	580	2182	0.8744	54.0032
GRMZM2G037177	579	1133	0.9117	103.823
GRMZM2G160032	579	2613	0.8936	45.0179
GRMZM2G168382	579	1943	0.5317	60.5413
GRMZM2G014004	579	2049	0.9512	57.4094
GRMZM2G168149	579	1376	0.9295	85.4883
GRMZM2G100225	579	1259	0.784	93.4328
GRMZM2G479744	579	2343	0.9979	50.2056
GRMZM2G011742	578	2643	0.8014	44.4301
GRMZM2G022538	578	1568	0.7825	74.8907
GRMZM2G083551	578	1638	0.8284	71.6903
GRMZM2G107362	577	1790	0.8955	65.4891
GRMZM2G000749	577	2855	0.8834	41.0597
GRMZM2G165926	577	3105	0.5823	37.7538
GRMZM2G019050	577	3290	0.9052	35.6309
GRMZM2G100229	577	2430	0.8979	48.2409
GRMZM2G040296	577	5332	0.9194	21.9853
GRMZM2G174202	577	1846	0.9301	63.5024
GRMZM2G056870	576	1810	0.5519	64.6532
GRMZM2G103546	576	2559	0.9852	45.7297
GRMZM2G065566	576	2616	0.9159	44.7333
GRMZM2G115518	575	2504	0.7923	46.653
GRMZM2G359234	575	2876	0.6711	40.6186
GRMZM2G119675	575	854	0.596	136.791
GRMZM2G121303	575	1556	0.7892	75.0766
GRMZM2G427097	574	2541	0.8166	45.8937
GRMZM2G147671	574	1715	0.9108	67.9977
GRMZM2G457889	574	2609	0.9368	44.6976
GRMZM2G308106	574	1556	0.9145	74.946
GRMZM2G389362	574	2151	0.9172	54.2148
GRMZM2G045664	574	914	0.9092	127.589
GRMZM2G139431	573	683	0.8009	170.443
GRMZM2G077208	573	1270	0.4819	91.6637
AC231180.2	573	3297	0.279	35.3087
GRMZM2G097854	572	1760	0.8074	66.0282
GRMZM5G823004	572	2314	0.9296	50.2203
GRMZM2G071959	572	824	0.8277	141.031
GRMZM2G176028	572	1506	0.9057	77.1645
GRMZM2G149406	572	4720	0.8017	24.6207
GRMZM2G378580	571	3569	0.8221	32.5039
GRMZM2G081812	571	1699	0.9459	68.2793
GRMZM2G433162	571	2130	0.9385	54.4632
GRMZM2G095348	571	3442	0.9617	33.7032
GRMZM2G319445	571	1726	0.8441	67.2112
GRMZM2G179097	571	3173	0.9357	36.5605
GRMZM2G024484	571	2024	0.9145	57.3155
GRMZM2G121612	570	4008	0.9563	28.8931
GRMZM2G136443	570	3379	0.8316	34.2715
GRMZM2G081102	570	1034	0.8781	111.996
GRMZM2G340065	569	3111	0.495	37.1585
GRMZM2G336962	569	4693	0.902	24.6325
GRMZM2G385287	569	1387	0.5847	83.3455
GRMZM2G150521	569	1325	0.8732	87.2454
GRMZM2G158205	569	1667	0.8584	69.3462
GRMZM2G021483	569	4691	0.8825	24.643
GRMZM2G102421	568	1529	0.9052	75.4722
GRMZM2G403636	568	2875	0.7951	40.1381
GRMZM2G021816	568	1660	0.9211	69.5163
GRMZM2G050984	567	2354	0.9669	48.9354
GRMZM2G442008	567	1595	0.8044	72.2219
GRMZM2G022403	566	841	0.547	136.731
GRMZM2G149428	566	1594	0.7942	72.1397
GRMZM2G047813	566	1646	0.4721	69.8607
GRMZM2G060987	566	1977	0.8275	58.1642
GRMZM2G121312	566	1849	0.8145	62.1908
GRMZM2G006042	566	3202	0.9291	35.9121
GRMZM2G314769	565	1145	0.786	100.251
GRMZM2G004997	565	2388	0.8853	48.0685
GRMZM2G019246	565	2381	0.8946	48.2098
GRMZM2G006117	565	2503	0.9057	45.86
GRMZM2G132796	564	2659	0.8827	43.093
GRMZM2G402002	564	3537	0.9324	32.3959
GRMZM2G061487	564	1569	0.9433	73.0302
GRMZM2G109056	564	3072	0.862	37.2996
GRMZM2G118743	564	2454	0.89	46.6929
GRMZM2G014076	563	2535	0.5779	45.1208
GRMZM2G064374	563	2200	0.9623	51.9915
GRMZM2G123587	563	5721	0.9372	19.9932
GRMZM2G119650	562	1801	0.9178	63.397
GRMZM2G003715	562	2769	0.9166	41.2344
GRMZM2G113156	562	2217	0.9048	51.5011
GRMZM2G007729	562	1186	0.8415	96.2715
GRMZM2G140432	560	3097	0.9441	36.7361
GRMZM2G057674	560	2666	0.7933	42.6751
GRMZM2G032496	560	2550	0.9216	44.6164
GRMZM2G159369	559	1798	0.7386	63.1638
GRMZM2G073979	559	1323	0.9327	85.8417
GRMZM2G574782	559	1985	0.8927	57.2134
GRMZM2G056103	559	3697	0.9573	30.7191
GRMZM2G048277	559	1999	0.8609	56.8127
GRMZM2G135970	559	1653	0.8554	68.7045
GRMZM2G165987	559	1697	0.8385	66.9231
GRMZM2G153368	558	754	0.748	150.352
GRMZM2G058745	558	2136	0.9054	53.0737
GRMZM2G013324	558	2838	0.9232	39.9455
GRMZM2G059991	557	1110	0.9153	101.948
GRMZM2G469162	557	4107	0.9299	27.5535
GRMZM2G006707	557	3054	0.9532	37.0538
GRMZM2G043383	556	2116	0.8478	53.3833
GRMZM2G120652	556	1720	0.7209	65.6739
GRMZM2G046407	556	2858	0.9402	39.5238
GRMZM2G104958	556	3675	0.9818	30.7372
GRMZM2G064390	556	2267	0.8641	49.8276
GRMZM2G015784	556	1768	0.5707	63.8909
GRMZM2G128176	555	6450	0.7727	17.4815
GRMZM2G117582	555	1848	0.4486	61.0151
GRMZM2G348512	554	1636	0.7696	68.7975
GRMZM2G006953	554	971	0.6591	115.914
GRMZM2G173341	554	2057	0.6451	54.7169
GRMZM2G161302	553	1431	0.9455	78.5112
GRMZM2G092327	553	2650	0.7985	42.3961
GRMZM2G160463	553	1190	0.8067	94.4114
GRMZM2G111666	553	2440	0.9074	46.0449
GRMZM2G069911	553	1248	0.8806	90.0237
GRMZM2G025812	553	1336	0.8847	84.094
GRMZM2G368448	553	4559	0.8478	24.6435
GRMZM2G082484	552	1796	0.9326	62.4423
GRMZM2G099328	551	2463	0.8226	45.45
GRMZM2G444808	551	4342	0.7232	25.7815
GRMZM2G172523	551	2595	0.9568	43.1381
GRMZM5G882852	551	1473	0.539	75.9968
GRMZM2G054905	551	3778	0.8039	29.6303
GRMZM2G008410	551	1900	0.7968	58.9175
GRMZM2G438551	550	1002	0.7365	111.517
GRMZM2G015610	550	2379	0.7419	46.9693
GRMZM2G477872	549	4606	0.8409	24.2156
GRMZM2G463032	549	4419	0.5483	25.2403
GRMZM2G026442	549	4043	0.8454	27.5877
GRMZM2G074314	549	2341	0.9381	47.645
GRMZM2G151252	549	1745	0.6344	63.918
GRMZM2G052875	548	2408	0.9576	46.2349
GRMZM2G420310	548	2126	0.9205	52.3677
GRMZM2G464401	548	2099	0.8252	53.0413
GRMZM2G426511	548	1637	0.9334	68.0108
GRMZM2G142757	548	1336	0.985	83.3336
GRMZM2G026470	548	1679	0.7284	66.3096
GRMZM2G000044	548	1102	0.6697	101.029
GRMZM2G003306	547	921	0.759	120.663
GRMZM2G059893	547	1368	0.7734	81.2358
GRMZM2G022629	547	1836	0.7288	60.5286
GRMZM2G114702	547	1730	0.863	64.2373
GRMZM2G063792	546	2267	0.9202	48.9314
GRMZM2G022365	546	2453	0.7905	45.2211
GRMZM2G063961	546	1731	0.9197	64.0829
AC235541.1	546	3009	0.9588	36.8652
GRMZM2G135456	546	3221	0.8867	34.4388
AC217271.3	546	1834	0.8566	60.4839
GRMZM2G016827	546	1333	0.9025	83.2164
GRMZM5G828229	546	2690	0.8498	41.237
GRMZM2G147791	546	642	0.7539	172.784
GRMZM2G174896	545	1957	0.9617	56.5786
GRMZM5G873681	545	2057	0.8668	53.828
GRMZM2G160174	545	1337	0.8407	82.8155
GRMZM2G153206	545	933	0.9218	118.676
GRMZM2G140156	545	3733	0.9437	29.6609
GRMZM2G414540	544	1424	0.9607	77.6131
GRMZM2G046558	544	1514	0.9313	72.9994
GRMZM2G136296	544	4026	0.7931	27.4518
GRMZM2G012628	544	2254	0.7347	49.0333
GRMZM2G026459	543	2653	0.8775	41.5823
GRMZM2G156756	543	3573	0.9415	30.8754
GRMZM2G022313	543	2347	0.9548	47.0038
GRMZM2G078569	543	3062	0.776	36.0281
GRMZM2G178968	543	1167	0.8835	94.5312
GRMZM2G180324	543	1721	0.9001	64.1011
GRMZM2G029258	543	3926	0.945	28.0993
GRMZM2G160906	543	2530	0.9553	43.6039
GRMZM2G119755	543	836	0.9055	131.959
GRMZM2G029396	542	1800	0.9367	61.1749
GRMZM5G839757	542	1986	0.9673	55.4455
GRMZM2G331032	542	2011	0.9826	54.7562
GRMZM2G306915	542	2397	0.9754	45.9386
GRMZM2G399320	542	4309	0.8413	25.5546
GRMZM2G376074	542	4124	0.9273	26.701
GRMZM2G160569	542	1891	0.9297	58.231
GRMZM2G056221	542	963	0.9958	114.346
GRMZM2G470740	542	2431	0.914	45.2961
GRMZM2G170646	541	1725	0.8243	63.7169
GRMZM2G128206	541	1291	0.9063	85.1368
GRMZM2G092296	541	2098	0.5019	52.3888
GRMZM2G029559	541	1726	0.9027	63.68
AC210193.4	541	840	0.9905	130.847
GRMZM2G307252	541	1979	0.8777	55.539
GRMZM2G324886	541	1085	0.929	101.301
GRMZM2G103345	540	2775	0.7578	39.5346
GRMZM2G054221	540	1769	0.8875	62.0172
GRMZM2G104955	540	3485	0.9604	31.4802
GRMZM5G876898	539	1636	0.8429	66.9348
GRMZM2G138425	539	3546	0.7516	30.8814
GRMZM2G181251	539	4007	0.8545	27.3285
GRMZM2G075624	539	960	0.7125	114.068
GRMZM2G058913	538	3138	0.9277	34.8318
GRMZM2G121565	538	2378	0.9525	45.9639
GRMZM2G142157	538	2230	0.8794	49.0144
GRMZM2G151387	538	2964	0.9055	36.8766
GRMZM2G161337	538	2722	0.935	40.1551
GRMZM2G028353	537	4227	0.9092	25.81
GRMZM2G004799	537	2165	0.976	50.3921
GRMZM2G433801	537	7364	0.8421	14.8152
GRMZM2G181371	537	1445	0.0637	75.501
GRMZM2G107491	537	1988	0.91	54.8787
GRMZM2G073934	537	2084	0.9271	52.3507
GRMZM2G136400	537	1862	0.898	58.5923
GRMZM2G153704	537	5052	0.7001	21.5952
GRMZM2G168364	536	1608	0.8937	67.7213
GRMZM2G013461	536	1287	0.7677	84.6121
GRMZM2G057243	536	2020	0.9723	53.9088
GRMZM2G039238	536	2199	0.9086	49.5206
GRMZM2G094595	536	1636	0.7781	66.5622
GRMZM2G007025	536	1355	0.9749	80.3659
GRMZM2G109429	535	1829	0.4735	59.4274
GRMZM2G140328	535	3559	0.9163	30.5402
GRMZM2G455828	534	1795	0.4217	60.4398
GRMZM2G040247	534	3517	0.8467	30.8472
GRMZM2G080775	534	2794	0.9588	38.8294
GRMZM2G060357	534	1379	0.8274	78.6726
GRMZM2G069061	533	1166	0.9014	92.8699
GRMZM2G084279	533	1194	0.9422	90.692
GRMZM2G099628	533	2729	0.9256	39.6798
GRMZM2G083253	533	1868	0.5782	57.9691
GRMZM5G878530	533	2705	0.9287	40.0319
AC212859.3	533	5346	0.8376	20.2556
AC211737.3	533	2115	0.8298	51.1992
GRMZM2G392125	533	1535	0.8215	70.5448
GRMZM2G147811	533	4439	0.9207	24.3943
GRMZM2G447632	533	869	0.4833	124.61
GRMZM2G170843	533	2363	0.9619	45.8258
GRMZM2G011526	532	2590	0.9332	41.7309
GRMZM2G061537	532	2098	0.8451	51.5172
GRMZM2G442148	532	2310	0.8558	46.7892
GRMZM2G406074	532	2105	0.6584	51.3459
GRMZM2G158766	532	847	0.8135	127.607
GRMZM2G132678	531	1662	0.3857	64.9097
GRMZM2G164821	531	2347	0.9578	45.965
GRMZM2G017421	530	3218	0.9344	33.4608
GRMZM2G017586	530	1321	0.9122	81.5116
GRMZM2G152549	529	2681	0.8695	40.0871
GRMZM2G068657	529	2015	0.9494	53.3368
GRMZM2G033931	529	3814	0.9386	28.1787
GRMZM2G424832	529	4055	0.8197	26.504
GRMZM2G126821	528	2042	0.7591	52.5321
GRMZM2G117935	528	1219	0.8097	87.9988
GRMZM2G014136	528	2489	0.9815	43.0978
GRMZM2G059580	528	1829	0.8835	58.6498
GRMZM2G114739	528	1957	0.813	54.8137
GRMZM2G090422	527	1109	0.7628	96.544
GRMZM2G070562	527	2205	0.9293	48.5566
GRMZM2G063069	527	1782	0.8648	60.0827
GRMZM2G421491	527	3394	0.7826	31.5461
GRMZM2G011592	527	2036	0.7485	52.5871
GRMZM2G042055	526	3155	0.9246	33.8714
GRMZM2G051764	526	1886	0.9316	56.6618
AC197672.3	526	6978	0.8951	15.3144
GRMZM2G036916	526	3254	0.8977	32.8409
GRMZM2G005493	526	2126	0.889	50.2654
GRMZM2G028766	526	3213	0.3803	33.2599
GRMZM2G443668	525	3947	0.8873	27.0233
GRMZM2G063566	525	1348	0.9852	79.1254
GRMZM2G113655	525	2048	0.917	52.0806
GRMZM2G144868	525	2354	0.8059	45.3105
GRMZM2G024354	525	1022	0.8474	104.365
GRMZM2G074567	525	1820	0.7918	58.6049
GRMZM2G125044	524	3315	0.8615	32.114
AC185226.4	524	2790	0.9269	38.1569
AC199541.4	524	1645	0.3508	64.716
GRMZM2G142640	524	861	0.8362	123.644
GRMZM5G830403	523	1318	0.8794	80.6181
GRMZM2G003734	523	2506	0.9589	42.4001
GRMZM2G175076	523	1315	0.8289	80.802
GRMZM2G464000	523	2968	0.9235	35.8001
GRMZM2G422651	523	2301	0.9174	46.1776
GRMZM2G097812	522	3029	0.9564	35.012
GRMZM2G147726	522	1998	0.3433	53.0788
GRMZM2G150004	522	2301	0.6471	46.0893
GRMZM2G111224	522	2877	0.869	36.8618
GRMZM2G155232	522	1960	0.9153	54.1079
GRMZM2G005869	521	2224	0.9411	47.5937
GRMZM2G169458	521	1925	0.9044	54.9861
GRMZM2G139822	521	1876	0.9504	56.4224
GRMZM2G175140	521	2080	0.9106	50.8886
GRMZM2G066650	521	3856	0.9424	27.4503
GRMZM2G049342	521	4146	0.8953	25.5302
GRMZM2G152975	521	1849	0.8545	57.2463
GRMZM2G033138	520	2885	0.9629	36.6188
GRMZM2G703415	520	4478	0.952	23.592
GRMZM2G475017	520	2675	0.8198	39.4935
GRMZM2G343972	520	2418	0.962	43.6911
GRMZM5G851654	520	2808	0.3276	37.6229
GRMZM2G017616	520	3392	0.8402	31.1454
AC206259.3	520	3704	0.6566	28.5219
GRMZM2G074589	519	2247	0.9243	46.9257
GRMZM5G827171	519	2221	0.8555	47.475
GRMZM5G813111	519	1625	0.9058	64.8874
GRMZM2G062373	519	1687	0.8382	62.5027
GRMZM2G104430	519	1920	0.9026	54.9177
GRMZM2G072080	519	1854	0.794	56.8727
GRMZM2G164538	518	1913	0.6477	55.0125
GRMZM2G027825	518	2147	0.8728	49.0167
GRMZM2G161611	518	1758	0.8925	59.8628
GRMZM2G004057	518	2592	0.7928	40.6014
GRMZM2G099481	518	3628	0.9278	29.0074
GRMZM2G018398	518	1637	0.9218	64.2876
GRMZM2G441541	518	3504	0.867	30.0339
GRMZM2G095921	518	3253	0.9029	32.3513
GRMZM2G142072	518	3375	0.9336	31.1819
[truncated: 22,361 more rows]

## Sheet: 2D
	Genes expressed in 3HAP
GeneID	Uniq_reads_num	Length	Coverage	RPKM
GRMZM2G168651	43334	1607	0.8631	6434.8
GRMZM2G158394	30836	1432	0.7814	5138.51
GRMZM2G136910	23252	1250	0.732	4438.87
GRMZM2G402631	20641	978	0.9949	5036.33
GRMZM2G051943	19911	1246	0.992	3813.27
GRMZM2G153292	19068	1889	0.9354	2408.77
GRMZM2G101958	18807	1057	0.6991	4245.87
GRMZM2G053206	18636	1372	0.9526	3241.31
GRMZM2G092474	15652	1133	0.8517	3296.57
GRMZM2G109130	15223	2891	0.9747	1256.53
GRMZM2G010868	14974	1704	0.4613	2096.96
GRMZM2G419891	13878	1976	0.9747	1675.95
GRMZM2G453805	13289	1355	0.9137	2340.32
GRMZM2G039639	12175	1184	0.81	2453.8
GRMZM2G080603	11701	1547	0.6723	1804.91
GRMZM2G006937	11036	2794	0.8851	942.557
GRMZM2G169372	10988	1041	0.8012	2518.78
GRMZM2G154397	10922	2526	0.8036	1031.79
GRMZM2G014695	10737	2100	0.7862	1220.07
GRMZM2G409726	10537	2382	0.7863	1055.6
GRMZM2G112968	10142	1384	0.9595	1748.68
GRMZM2G118610	8892	1818	0.9252	1167.15
GRMZM2G125032	8611	1279	0.9859	1606.59
GRMZM2G117989	8136	1320	0.6841	1470.82
GRMZM2G164229	7665	1778	0.4741	1028.73
GRMZM2G700208	7627	1173	0.9991	1551.59
GRMZM2G005633	7516	1591	0.7945	1127.3
GRMZM2G375116	7323	3535	0.9528	494.336
GRMZM2G123029	7278	2021	0.951	859.346
GRMZM2G023786	6801	1433	0.9498	1132.53
GRMZM2G079348	6801	2788	0.5488	582.106
GRMZM2G139874	6407	2010	0.893	760.643
GRMZM2G457003	6265	3018	0.9569	495.364
GRMZM2G049915	6247	1832	0.8433	813.707
GRMZM2G103342	6215	2120	0.8769	699.564
GRMZM2G009479	6172	3118	0.9753	472.359
GRMZM2G450233	6172	2213	0.6602	665.529
GRMZM2G056252	5808	1961	0.9138	706.759
GRMZM2G067225	5785	2380	0.7492	580.028
GRMZM2G075255	5743	2491	0.9173	550.158
GRMZM2G145518	5618	1779	0.9028	753.578
GRMZM2G104325	5534	3579	0.8117	368.977
GRMZM2G074604	5529	2783	0.8534	474.084
GRMZM2G057514	5448	2024	0.8488	642.316
GRMZM2G146308	5331	901	0.9345	1411.91
GRMZM2G122276	5211	761	0.9869	1634.02
GRMZM2G308860	5161	2366	0.9983	520.525
GRMZM2G079616	5055	1594	0.9191	756.755
GRMZM2G064799	4379	2559	0.9097	408.345
GRMZM5G841015	4314	3884	0.9853	265.047
GRMZM2G141473	4184	4649	0.9632	214.76
GRMZM2G060583	4175	4213	0.9775	236.476
GRMZM2G098298	3984	1571	0.9039	605.153
GRMZM2G071154	3956	2103	0.9624	448.889
GRMZM2G432128	3910	2347	0.801	397.545
GRMZM2G166159	3818	2989	0.8933	304.812
GRMZM2G355752	3775	1534	0.6975	587.238
GRMZM2G015605	3771	803	0.6227	1120.63
GRMZM2G015419	3768	3098	0.9955	290.236
GRMZM2G063162	3766	4493	0.6984	200.017
GRMZM2G325575	3710	1867	0.6786	474.189
GRMZM2G104400	3691	2626	0.9429	335.407
GRMZM2G154523	3688	1780	0.841	494.417
GRMZM2G165901	3654	1256	0.6561	694.226
GRMZM2G119894	3641	4676	0.9416	185.81
GRMZM2G180625	3587	2060	0.5879	415.515
GRMZM2G099454	3585	1227	0.9446	697.215
GRMZM2G445602	3572	2435	0.9676	350.054
GRMZM2G117971	3537	782	0.5473	1079.32
GRMZM5G851266	3519	2172	0.9936	386.618
GRMZM2G064302	3487	2022	0.9075	411.522
GRMZM2G478920	3469	3706	0.8287	223.368
GRMZM2G156632	3441	619	0.8562	1326.53
GRMZM2G107839	3440	1094	0.4963	750.349
GRMZM2G427097	3430	2541	0.8327	322.116
GRMZM5G874955	3409	2382	0.9605	341.513
GRMZM2G374971	3404	1319	0.6566	615.839
GRMZM2G116273	3389	1337	0.7001	604.87
GRMZM2G129064	3388	2275	0.8598	355.373
GRMZM2G444801	3376	2618	0.9568	307.72
GRMZM2G116646	3367	1591	0.9654	505.004
GRMZM5G834758	3350	1571	0.9669	508.851
GRMZM2G029048	3338	2610	0.9402	305.188
AC207722.2	3333	1166	0.8739	682.117
GRMZM2G110504	3301	899	0.9188	876.21
GRMZM2G142584	3296	2508	0.9039	313.604
GRMZM2G047055	3271	2227	0.714	350.496
GRMZM2G011588	3265	2952	0.9458	263.93
GRMZM2G107101	3259	4571	0.9427	170.136
GRMZM2G084779	3258	2890	0.9585	269.014
GRMZM2G373522	3249	1356	0.9056	571.758
GRMZM2G176595	3239	1218	0.8678	634.579
GRMZM2G481440	3207	1865	0.9968	410.339
GRMZM5G848768	3186	1977	0.9327	384.558
GRMZM2G029912	3164	2452	0.971	307.92
GRMZM2G057186	3124	2184	0.9345	341.335
GRMZM2G156861	3124	2955	0.9858	252.276
AC195340.3	3118	3444	0.3656	216.041
GRMZM2G020801	3093	3273	0.9493	225.505
GRMZM2G142802	3062	1233	0.9505	592.604
GRMZM2G340251	3057	2648	0.8625	275.486
GRMZM2G139300	3029	2200	0.9805	328.548
GRMZM2G366392	2999	2055	0.928	348.247
GRMZM2G078033	2960	2411	0.9021	292.966
GRMZM2G087901	2946	2059	0.9791	341.428
GRMZM2G117198	2904	1633	0.94	424.358
GRMZM2G058032	2902	1436	0.9464	482.242
GRMZM2G117942	2890	792	0.7664	870.753
GRMZM2G057823	2830	1697	0.9222	397.948
GRMZM2G162461	2830	2324	0.923	290.585
GRMZM2G137329	2815	724	0.982	927.816
GRMZM2G023418	2794	4506	0.9802	147.964
GRMZM2G067546	2789	2731	0.9564	243.696
GRMZM2G092447	2769	3582	0.8437	184.467
GRMZM2G061969	2700	3144	0.9443	204.929
GRMZM2G109560	2693	3264	0.9479	196.883
GRMZM2G147014	2686	1404	0.8034	456.521
GRMZM2G152466	2684	2297	0.7357	278.833
GRMZM2G169033	2674	2420	0.9632	263.675
GRMZM2G129034	2651	1616	0.797	391.463
GRMZM2G402936	2638	1326	0.7345	474.737
GRMZM2G124434	2634	1546	0.9308	406.564
GRMZM2G070360	2504	1282	0.9275	466.089
GRMZM2G090980	2497	1626	0.8856	366.455
GRMZM2G105996	2486	1162	0.9148	510.525
GRMZM2G116140	2447	1756	0.697	332.531
GRMZM2G009335	2439	1914	0.9519	304.083
AC234203.1	2439	4491	0.984	129.596
GRMZM2G093313	2418	2055	0.9981	280.78
GRMZM2G073465	2407	2077	0.8739	276.542
GRMZM2G144387	2391	1127	0.8163	506.265
GRMZM2G097059	2383	1186	0.8929	479.47
GRMZM2G382413	2353	2247	0.9542	249.886
GRMZM2G094165	2349	1124	0.9733	498.7
GRMZM2G102829	2342	2673	0.8911	209.079
GRMZM2G103812	2336	2097	0.8612	265.826
GRMZM2G054050	2335	2361	0.9856	236.001
GRMZM2G159285	2332	1503	0.9494	370.247
GRMZM2G162359	2331	1736	0.8007	320.416
GRMZM2G006894	2327	3409	0.9789	162.889
GRMZM2G073725	2324	1781	0.8613	311.383
GRMZM2G180283	2320	1570	0.9312	352.623
GRMZM2G152328	2300	1989	0.6375	275.94
GRMZM2G067985	2299	2685	0.5732	204.323
GRMZM2G331368	2288	11519	0.9391	47.3984
GRMZM2G340656	2276	2894	0.8701	187.67
GRMZM2G153541	2274	1961	0.8001	276.717
GRMZM5G806449	2273	1974	0.9352	274.773
GRMZM2G365160	2265	2100	0.9314	257.378
GRMZM5G814700	2264	1810	0.9547	298.483
GRMZM2G112456	2253	2726	0.8899	197.223
GRMZM2G134256	2238	1922	0.9022	277.862
GRMZM2G415529	2233	5346	0.771	99.674
GRMZM5G864319	2231	2641	0.9546	201.583
GRMZM2G060800	2230	2425	0.8449	219.44
GRMZM2G009808	2228	3621	0.9177	146.828
GRMZM2G001297	2217	2720	0.9765	194.5
GRMZM2G134708	2205	1996	0.8798	263.615
GRMZM2G080056	2200	1813	0.9884	289.566
GRMZM2G392791	2173	1980	0.696	261.889
GRMZM2G080530	2167	2562	0.929	201.838
GRMZM2G352415	2153	1637	0.9786	313.847
GRMZM2G010356	2150	1921	0.9787	267.075
GRMZM2G088212	2128	2178	0.9504	233.15
GRMZM2G014240	2116	2894	0.9098	174.477
GRMZM2G056068	2115	2636	0.7709	191.464
GRMZM2G178398	2113	3613	0.9768	139.558
GRMZM2G127072	2110	1505	0.915	334.556
GRMZM2G343543	2102	1886	0.9115	265.958
GRMZM2G058910	2094	3761	0.7602	132.86
GRMZM2G328500	2093	2543	0.7495	196.402
GRMZM2G165917	2091	2604	0.7761	191.618
GRMZM2G422750	2086	2217	0.594	224.528
GRMZM2G450125	2085	2863	0.9155	173.783
GRMZM2G025860	2079	4070	0.9752	121.894
GRMZM2G094712	2052	2163	0.7957	226.383
GRMZM5G800112	2046	903	0.9391	540.68
GRMZM2G060296	2045	2322	0.9608	210.162
GRMZM2G145461	2044	1227	0.9315	397.52
GRMZM2G153268	2039	1086	0.9236	448.033
GRMZM2G123558	2019	1275	0.9404	377.875
GRMZM2G364349	2008	1785	0.9552	268.44
GRMZM2G396553	2004	3369	0.8943	141.945
GRMZM2G081155	1990	2311	0.9662	205.483
GRMZM2G158147	1981	1929	0.9679	245.061
GRMZM2G084881	1970	1995	0.8291	235.638
GRMZM2G310115	1969	3289	0.4579	142.858
GRMZM5G835323	1966	1250	0.7112	375.315
GRMZM2G026930	1958	1564	0.9655	298.743
GRMZM2G118003	1952	2170	0.888	214.656
GRMZM2G070659	1952	1836	0.6754	253.705
GRMZM2G041959	1934	2574	0.9693	179.296
GRMZM2G090338	1912	2420	0.9508	188.536
GRMZM2G353024	1910	1925	0.8187	236.769
GRMZM2G055320	1910	2240	0.9437	203.473
GRMZM2G003762	1904	1733	0.7507	262.175
GRMZM2G039238	1904	2199	0.9663	206.616
GRMZM2G122231	1887	3123	0.8873	144.186
GRMZM2G467799	1871	8676	0.9488	51.4608
GRMZM2G042313	1865	2526	0.9838	176.185
GRMZM2G126361	1858	2674	0.9058	165.808
GRMZM2G076062	1854	2836	0.9711	156
GRMZM2G433162	1848	2130	0.9526	207.035
GRMZM2G102471	1848	1291	0.7064	341.584
GRMZM2G144153	1841	1250	0.6472	351.452
GRMZM2G170013	1837	2732	0.9411	160.454
GRMZM2G166044	1833	1709	0.9813	255.943
GRMZM2G013002	1833	1857	0.8126	235.544
GRMZM2G700188	1831	2274	0.7102	192.141
GRMZM2G166281	1826	2328	0.5597	187.172
GRMZM2G077197	1820	2459	0.9776	176.618
GRMZM2G151992	1812	1442	0.9521	299.858
GRMZM5G840582	1796	3028	0.9412	141.538
GRMZM2G152975	1794	1849	0.8572	231.53
GRMZM2G151755	1793	1734	0.2676	246.748
GRMZM2G095727	1785	3454	0.9957	123.321
GRMZM2G382914	1781	1985	0.8156	214.104
GRMZM5G894233	1781	2704	0.7382	157.174
GRMZM2G125356	1779	2083	0.8833	203.802
GRMZM2G094497	1778	2063	0.9331	205.662
GRMZM2G177631	1778	4406	0.8255	96.2963
GRMZM2G130987	1771	1797	0.9822	235.176
GRMZM2G032003	1761	2560	0.782	164.15
GRMZM2G005954	1747	1833	0.6792	227.433
GRMZM2G148453	1743	1485	0.8842	280.087
GRMZM2G125635	1736	2100	0.9595	197.266
GRMZM2G421857	1735	2598	0.7082	159.361
GRMZM2G083526	1734	2569	0.9194	161.067
GRMZM2G363460	1733	1839	0.9913	224.874
GRMZM2G178917	1730	2993	0.992	137.931
GRMZM5G879278	1723	2327	0.9149	176.69
GRMZM5G801875	1722	2165	0.9695	189.801
GRMZM2G159397	1712	1730	0.7116	236.146
GRMZM2G438871	1711	2343	0.9569	174.261
GRMZM5G854613	1708	2045	0.9863	199.304
GRMZM5G866843	1702	2317	0.9784	175.289
GRMZM2G027098	1700	1283	0.9049	316.187
GRMZM2G018103	1696	1822	0.9067	222.126
GRMZM2G430600	1692	1954	0.6996	206.632
GRMZM2G360517	1689	5913	0.9621	68.1623
GRMZM2G071021	1685	2027	0.851	198.367
GRMZM2G135588	1679	2272	0.9274	176.346
GRMZM2G113696	1678	1520	0.5875	263.433
GRMZM2G122937	1666	1333	0.8342	298.241
GRMZM2G425249	1666	1886	0.982	210.793
GRMZM2G174807	1666	1388	0.9193	286.423
GRMZM2G044947	1662	1925	0.8992	206.026
GRMZM2G047310	1662	3851	0.8343	102.986
GRMZM2G117707	1655	2779	0.6391	142.112
GRMZM2G078804	1652	1328	0.93	296.848
GRMZM2G053458	1650	1443	0.817	272.86
GRMZM2G115750	1648	1642	0.9281	239.5
GRMZM2G021299	1644	11999	0.9267	32.6948
GRMZM2G146819	1642	4332	0.991	90.4497
GRMZM2G005643	1640	1154	0.7236	339.125
GRMZM2G068682	1639	2161	0.9699	180.987
GRMZM2G154958	1639	1964	0.8574	199.141
GRMZM2G457562	1636	1658	0.8179	235.462
AC205502.4	1634	1614	0.8476	241.585
GRMZM2G091481	1634	2242	0.7819	173.916
GRMZM2G179024	1631	2524	0.9643	154.201
GRMZM2G027663	1626	2669	0.9715	145.376
GRMZM2G010909	1624	1199	0.854	323.213
GRMZM2G131969	1619	1981	0.8289	195.022
GRMZM2G012160	1613	1711	0.5283	224.961
GRMZM2G129354	1609	2163	0.9353	177.51
GRMZM5G872068	1608	1489	0.9523	257.7
GRMZM2G123896	1605	1622	0.5925	236.127
GRMZM2G089736	1605	1421	0.6791	269.528
GRMZM2G146246	1601	1758	0.7571	217.317
GRMZM2G317406	1599	939	0.77	406.355
GRMZM2G085924	1599	1509	0.9675	252.861
GRMZM2G312521	1585	3525	0.8496	107.298
GRMZM2G411536	1583	11470	0.896	32.9336
GRMZM2G084819	1579	14668	0.9461	25.6882
GRMZM2G015295	1579	2241	0.8568	168.137
GRMZM2G410991	1576	2132	0.6149	176.397
GRMZM2G157929	1568	2347	0.9254	159.425
AC203173.3	1567	2532	0.987	147.682
GRMZM2G139786	1563	850	0.8694	438.796
GRMZM2G479608	1560	1204	0.9269	309.186
GRMZM2G442658	1559	2277	0.7255	163.382
GRMZM5G837108	1559	1556	0.9724	239.089
GRMZM2G390896	1557	1905	0.9806	195.036
GRMZM2G326643	1552	6328	0.966	58.5258
GRMZM2G178958	1549	2170	0.7571	170.339
GRMZM2G110408	1546	2511	0.9693	146.921
GRMZM2G031790	1541	1935	0.9364	190.04
GRMZM2G117836	1539	3418	0.9479	107.446
GRMZM2G156800	1534	3512	0.7956	104.23
GRMZM2G083725	1527	1424	0.6952	255.889
GRMZM2G173536	1527	2166	0.9243	168.23
AC233866.1	1527	1344	0.9829	271.12
GRMZM2G180720	1519	1918	0.938	188.987
GRMZM2G004534	1518	2241	0.9054	161.641
GRMZM2G028393	1514	759	0.6957	475.999
GRMZM2G087326	1513	1493	0.9538	241.825
GRMZM2G071484	1510	1414	0.9993	254.83
GRMZM2G019404	1505	3384	0.6442	106.128
GRMZM2G389233	1501	3609	0.8997	99.2467
GRMZM2G161335	1499	1811	0.9696	197.517
GRMZM2G057243	1496	2020	0.9663	176.727
GRMZM2G056772	1486	808	0.9579	438.864
GRMZM2G017249	1485	1789	0.9994	198.079
GRMZM2G352129	1483	2698	0.8918	131.166
GRMZM2G069542	1482	3422	0.9348	103.345
GRMZM2G041175	1481	1343	0.9188	263.149
GRMZM2G053023	1476	1007	0.9027	349.767
GRMZM2G128971	1471	2104	0.8617	166.836
GRMZM2G136508	1471	2539	0.8212	138.252
GRMZM2G029249	1466	1432	0.9567	244.294
GRMZM2G019183	1450	4551	0.8574	76.0297
GRMZM2G025242	1447	1637	0.8919	210.932
GRMZM2G038783	1442	1610	0.9534	213.728
GRMZM2G087186	1434	2506	0.8575	136.55
GRMZM2G036708	1430	1771	0.8447	192.681
GRMZM2G073535	1426	2115	0.6118	160.891
GRMZM2G142409	1424	1533	0.8415	221.661
GRMZM2G128877	1423	2325	0.9553	146.051
GRMZM2G140917	1419	3453	0.9823	98.0636
AC233882.1	1418	3921	0.9645	86.2982
GRMZM2G302604	1418	2045	0.9584	165.465
GRMZM2G044038	1414	2100	0.9086	160.676
GRMZM2G157027	1411	2395	0.9745	140.587
GRMZM2G036217	1406	2339	0.8568	143.442
GRMZM5G883741	1406	2083	0.988	161.071
GRMZM2G391042	1405	3776	0.9192	88.7905
GRMZM2G093050	1405	3467	0.9302	96.7041
GRMZM2G151041	1404	3889	0.9164	86.1492
GRMZM2G162505	1402	1152	0.8941	290.414
GRMZM2G701082	1402	2080	0.851	160.845
GRMZM2G450498	1402	1812	0.9023	184.634
GRMZM5G892675	1397	4335	0.7894	76.9006
GRMZM2G132331	1395	1336	0.9978	249.167
GRMZM5G838098	1395	1433	0.9944	232.301
GRMZM5G864414	1392	2755	0.9884	120.57
GRMZM2G029219	1388	2179	0.9312	152.004
GRMZM2G326111	1386	1210	0.7934	273.338
GRMZM2G128171	1384	2208	0.6653	149.575
GRMZM2G009443	1380	3270	0.9431	100.706
GRMZM2G104876	1377	2626	0.5468	125.13
GRMZM2G431856	1373	1369	0.9861	239.326
GRMZM2G128056	1372	2032	0.9749	161.121
GRMZM2G046804	1369	1963	0.7229	166.42
GRMZM2G124353	1368	2213	0.8559	147.512
GRMZM2G171311	1361	2027	0.9615	160.224
AC233949.1	1360	2538	0.8546	127.87
GRMZM5G883417	1357	1567	0.9917	206.649
GRMZM2G034985	1355	3349	0.6617	96.5487
GRMZM2G028521	1355	3130	0.815	103.304
GRMZM2G127798	1353	2594	0.7984	124.466
GRMZM2G066024	1351	1877	0.7757	171.757
GRMZM5G855672	1351	1185	0.93	272.057
GRMZM2G116614	1342	1444	0.9578	221.772
GRMZM2G164074	1338	2168	0.9608	147.272
GRMZM2G020920	1337	4287	0.9902	74.4218
GRMZM2G167758	1337	1016	0.9469	314.022
GRMZM2G003715	1336	2769	0.8834	115.135
GRMZM2G127453	1335	2333	0.5521	136.549
GRMZM2G108474	1335	1471	0.6703	216.566
GRMZM2G103945	1334	1462	0.907	217.736
GRMZM2G378547	1333	2476	0.6926	128.47
GRMZM5G815894	1331	1357	0.885	234.056
GRMZM2G061135	1327	1715	0.8927	184.641
GRMZM2G377341	1323	7198	0.9603	43.8602
GRMZM2G108348	1323	1542	0.6044	204.738
GRMZM2G327595	1323	2335	0.7366	135.206
GRMZM2G160113	1321	1070	0.9766	294.606
GRMZM2G122479	1318	2473	0.9171	127.178
GRMZM2G056039	1318	2498	0.9103	125.906
GRMZM2G150248	1313	2244	0.9024	139.625
GRMZM2G089713	1310	3223	0.8287	96.9914
GRMZM2G015875	1308	4034	0.9343	77.3738
GRMZM2G145715	1305	2069	0.9067	150.512
GRMZM2G014395	1303	1976	0.9403	157.355
GRMZM2G020484	1303	2950	0.9119	105.401
GRMZM2G048371	1303	1839	0.9184	169.077
GRMZM2G033644	1299	2236	0.877	138.631
GRMZM2G080041	1298	3623	0.9765	85.4926
GRMZM2G085577	1297	2881	0.9889	107.428
GRMZM2G066460	1296	1365	0.8762	226.566
GRMZM2G122816	1296	1796	0.971	172.195
GRMZM2G084181	1295	5156	0.9789	59.9348
GRMZM2G365374	1294	2517	0.9046	122.68
GRMZM2G181192	1293	1402	0.9757	220.076
GRMZM2G124317	1291	1218	0.8186	252.93
GRMZM2G088064	1289	1720	0.9203	178.833
AC148152.3	1287	2196	0.1088	139.852
GRMZM2G147191	1276	2433	0.9868	125.15
GRMZM2G179941	1275	3717	0.9432	81.854
GRMZM2G165413	1273	3534	0.9728	85.9576
GRMZM2G029323	1272	1840	0.9293	164.965
GRMZM2G176307	1271	2014	0.6554	150.594
GRMZM2G174644	1270	2003	0.9346	151.302
GRMZM2G043435	1269	3912	0.9013	77.4079
GRMZM2G025833	1268	2222	0.9824	136.175
GRMZM2G132903	1266	2845	0.9297	106.188
GRMZM2G080466	1266	1557	0.5857	194.029
GRMZM2G066950	1261	2045	0.9956	147.144
GRMZM2G038598	1260	1811	0.8493	166.025
GRMZM2G055970	1259	1766	0.9083	170.121
GRMZM2G424181	1257	4857	0.9924	61.7575
GRMZM2G354604	1257	1322	0.9039	226.896
GRMZM2G156748	1256	2480	0.9968	120.854
GRMZM2G109842	1253	888	0.9516	336.713
GRMZM2G098577	1253	3141	0.9144	95.1931
GRMZM2G005887	1251	1929	0.7771	154.756
GRMZM2G152963	1243	4346	0.8642	68.2502
GRMZM2G364069	1243	2146	0.4702	138.218
GRMZM2G084717	1240	1390	0.9288	212.877
GRMZM2G180430	1237	1924	0.9257	153.422
GRMZM2G145236	1236	2752	0.9342	107.175
GRMZM2G144030	1234	1617	0.5207	182.107
GRMZM2G122871	1233	1909	0.8549	154.127
GRMZM2G362850	1232	3642	0.9215	80.7222
GRMZM2G416388	1231	1788	0.7947	164.291
GRMZM2G157018	1230	1001	0.962	293.22
GRMZM2G108849	1226	1790	0.7872	163.44
GRMZM2G160354	1225	776	0.8698	376.701
GRMZM2G082271	1223	4012	0.8402	72.7424
GRMZM2G018375	1223	1655	0.9009	176.34
GRMZM2G180659	1223	2505	0.6934	116.504
GRMZM2G132759	1222	1284	0.8333	227.106
GRMZM2G096475	1220	1087	0.9733	267.826
GRMZM2G155709	1217	2806	0.9205	103.496
GRMZM5G803565	1216	2088	0.9674	138.971
GRMZM5G899851	1215	2751	0.9571	105.392
GRMZM2G032219	1214	2210	0.8986	131.084
GRMZM2G181505	1211	1940	0.8433	148.958
GRMZM2G155321	1209	2270	0.9366	127.093
GRMZM2G176253	1207	2250	0.9191	128.011
GRMZM2G175243	1206	758	0.9644	379.665
GRMZM2G031545	1205	1283	0.788	224.121
GRMZM2G137409	1204	2877	0.9148	99.864
GRMZM2G111269	1200	2440	0.9389	117.358
GRMZM2G323418	1200	2071	0.8267	138.269
GRMZM2G052088	1198	1627	0.8519	175.708
GRMZM2G149751	1197	3753	0.4839	76.1093
GRMZM2G419209	1196	853	0.5053	334.583
GRMZM2G181151	1192	2279	0.8521	124.811
GRMZM2G052100	1189	936	0.6368	303.13
GRMZM2G102959	1189	2148	0.9046	132.09
GRMZM2G159643	1188	998	0.9459	284.059
GRMZM2G012434	1186	2600	0.8419	108.851
GRMZM2G032163	1186	2871	0.9951	98.5766
GRMZM2G125294	1184	6126	0.9626	46.1208
GRMZM2G098278	1184	1847	0.994	152.97
GRMZM5G876285	1181	878	0.9043	320.98
GRMZM2G092101	1181	2108	0.982	133.691
GRMZM2G035417	1178	2025	0.8094	138.817
GRMZM2G012611	1176	2786	0.9932	100.728
GRMZM2G091155	1172	1520	0.9434	183.995
GRMZM2G126397	1169	923	0.948	302.228
GRMZM2G109405	1168	2140	0.7421	130.242
GRMZM2G106424	1167	1539	0.8635	180.948
GRMZM2G011523	1166	953	0.5645	291.963
GRMZM2G048324	1164	2279	0.8947	121.88
GRMZM2G455075	1162	1886	0.9883	147.023
GRMZM2G061681	1162	3471	0.9758	79.8866
GRMZM2G149556	1161	993	0.6495	279.001
GRMZM2G082517	1161	1047	0.979	264.611
GRMZM2G012966	1161	4826	0.8746	57.4073
GRMZM5G844173	1154	3982	0.9483	69.1555
GRMZM2G343916	1150	3866	0.9878	70.9836
GRMZM2G105571	1150	1735	0.955	158.169
GRMZM2G022206	1149	1025	0.7941	267.497
GRMZM2G006977	1148	3735	0.9422	73.3455
GRMZM2G120304	1146	1401	0.9529	195.195
GRMZM2G118462	1146	3644	0.9152	75.0462
GRMZM2G099295	1139	1406	0.9666	193.313
GRMZM2G113726	1138	1962	0.9842	138.409
GRMZM5G829894	1138	1562	0.9533	173.854
GRMZM2G168382	1136	1943	0.5347	139.517
GRMZM2G177812	1133	2688	0.9665	100.583
GRMZM2G349749	1128	1596	0.8904	168.655
GRMZM2G090274	1127	2020	0.9688	133.136
GRMZM2G175140	1127	2080	0.9144	129.295
GRMZM2G074053	1124	2029	0.9207	132.192
GRMZM2G138589	1124	2491	0.8462	107.675
GRMZM2G007195	1124	3057	0.6634	87.7391
GRMZM2G015989	1122	2635	0.7886	101.61
GRMZM2G415359	1120	1693	0.7702	157.864
GRMZM5G858094	1120	7464	0.9622	35.8071
GRMZM2G323830	1119	2028	0.9127	131.669
GRMZM2G036092	1118	1501	0.9014	177.739
GRMZM2G142315	1116	1298	0.9961	205.169
GRMZM2G011070	1115	4285	0.9666	62.0935
GRMZM2G171518	1114	2086	0.8706	127.436
GRMZM2G105570	1113	2579	0.9876	102.983
GRMZM2G123922	1113	3408	0.9425	77.9324
GRMZM2G358059	1112	1861	0.8855	142.587
GRMZM2G086489	1108	2700	0.8574	97.926
GRMZM2G172664	1108	1054	0.5636	250.854
GRMZM5G848945	1107	2811	0.9434	93.9743
GRMZM2G464137	1107	1726	0.8621	153.048
GRMZM2G112165	1107	2919	0.8051	90.4973
GRMZM2G026991	1107	6849	0.9753	38.5694
GRMZM2G363813	1106	2486	0.9159	106.164
GRMZM2G055575	1106	1905	0.8567	138.542
GRMZM2G113137	1105	4126	0.9576	63.908
GRMZM2G087150	1103	1805	0.7623	145.821
GRMZM2G027995	1102	1916	0.9525	137.249
GRMZM2G079236	1098	2981	0.9544	87.8947
GRMZM2G479885	1097	1558	0.8825	168.02
GRMZM2G032821	1095	2256	0.8254	115.824
GRMZM2G068973	1095	1523	0.8483	171.568
GRMZM2G156320	1095	1992	0.9804	131.174
GRMZM2G447785	1094	1226	0.7553	212.936
AC196475.3	1094	1902	0.9632	137.255
GRMZM2G017229	1094	1996	0.9449	130.791
GRMZM2G045987	1092	3151	0.908	82.6983
GRMZM2G019236	1092	3864	0.9389	67.4385
GRMZM2G040397	1090	1932	0.9291	134.63
GRMZM2G166767	1088	3466	0.7314	74.907
GRMZM2G152891	1087	1160	0.7948	223.611
GRMZM2G109959	1086	790	0.5987	328.039
GRMZM2G004377	1084	2532	0.8476	102.162
GRMZM2G077333	1084	1353	0.9549	191.185
GRMZM2G111143	1082	1928	0.9378	133.919
GRMZM2G033570	1081	2707	0.9272	95.2927
GRMZM2G075077	1079	2738	0.9354	94.0395
GRMZM2G066197	1077	1202	0.7438	213.813
GRMZM2G036609	1077	5897	0.8882	43.582
GRMZM2G054559	1076	3274	0.8668	78.4252
GRMZM2G026470	1076	1679	0.676	152.927
GRMZM2G153977	1073	1232	0.7865	207.831
AC217050.4	1073	2667	0.4368	96.0061
GRMZM2G006178	1072	2380	0.963	107.483
GRMZM2G045070	1066	2915	0.8854	87.2652
GRMZM5G833124	1066	2163	0.9394	117.604
GRMZM2G012631	1065	2668	0.9457	95.2546
GRMZM2G456568	1064	3377	0.7634	75.1853
GRMZM2G130348	1063	2606	0.784	97.3377
GRMZM2G121333	1063	2140	0.9299	118.534
GRMZM2G159908	1062	1951	0.8795	129.894
GRMZM5G823004	1061	2314	0.9542	109.414
GRMZM2G397247	1061	3899	0.9367	64.9358
GRMZM2G057646	1058	3127	0.9399	80.7384
GRMZM2G077837	1057	1564	0.75	161.273
GRMZM2G016511	1055	1149	0.9077	219.106
GRMZM2G071087	1054	2306	0.9536	109.07
GRMZM2G153263	1052	2182	0.8886	115.049
GRMZM2G110735	1050	2808	0.791	89.2307
GRMZM2G170128	1049	2340	0.8043	106.975
GRMZM2G010302	1047	1657	0.8751	150.781
GRMZM2G094742	1047	1245	0.6329	200.678
GRMZM2G113272	1047	1629	0.9847	153.373
GRMZM2G071172	1047	3654	0.9253	68.3755
GRMZM2G168833	1044	1568	0.8367	158.883
GRMZM2G169270	1042	4826	0.8469	51.5232
GRMZM2G116135	1042	1070	0.8692	232.384
GRMZM2G056247	1040	1915	0.8997	129.595
GRMZM2G314110	1039	681	0.9809	364.075
GRMZM2G034924	1038	1330	0.8865	186.238
GRMZM2G102745	1036	1956	0.9351	126.39
GRMZM2G176465	1033	4063	0.9392	60.6702
GRMZM2G017110	1032	2100	0.9371	117.269
GRMZM2G395844	1027	1205	0.5585	203.379
GRMZM2G058675	1025	2342	0.9202	104.438
GRMZM2G072886	1024	1089	0.6979	224.385
GRMZM2G053299	1024	2009	0.8736	121.63
GRMZM2G025175	1022	933	0.9164	261.392
GRMZM2G073498	1021	2231	0.8983	109.206
GRMZM2G176397	1021	3788	0.9221	64.3188
GRMZM2G163081	1021	1513	0.8367	161.031
GRMZM2G154218	1021	1782	0.6302	136.723
GRMZM2G080731	1021	1505	0.8671	161.887
GRMZM2G153162	1020	6145	0.953	39.6096
GRMZM2G116086	1019	2974	0.92	81.7627
GRMZM2G018950	1017	2086	0.8754	116.34
GRMZM2G114954	1017	1012	0.1571	239.807
GRMZM2G149576	1017	2204	0.9524	110.111
GRMZM2G374302	1016	2202	0.9659	110.103
GRMZM2G041697	1016	5460	0.9233	44.4041
GRMZM2G131912	1014	2163	0.7957	111.867
GRMZM2G053669	1013	2492	0.7612	97.0027
GRMZM2G435034	1013	2287	0.9873	105.698
AC208221.3	1012	744	0.6035	324.586
GRMZM2G064868	1012	3925	0.9758	61.5266
GRMZM2G025598	1010	2882	0.8675	83.6276
AC209208.3	1010	2967	0.3033	81.2318
GRMZM2G439201	1008	2117	0.4606	113.622
GRMZM2G177005	1008	1036	0.8871	232.179
GRMZM2G169384	1008	1793	0.9476	134.154
GRMZM2G037204	1008	2874	0.4555	83.6943
GRMZM2G115812	1007	7741	0.6991	31.0424
GRMZM2G157462	1006	3384	0.9347	70.9398
GRMZM2G330019	1006	2766	0.91	86.7897
GRMZM2G441347	1006	2519	0.9643	95.2998
GRMZM2G113203	1004	5260	0.8582	45.5481
GRMZM2G042074	1004	3944	0.9518	60.7462
GRMZM2G017013	1004	2415	0.7636	99.2062
GRMZM2G069162	1003	2816	0.7315	84.9944
GRMZM5G854138	1003	961	0.8554	249.058
GRMZM2G155532	1002	2767	0.8984	86.4133
GRMZM2G162699	1002	2612	0.9824	91.5412
AC203535.4	1001	2778	0.982	85.9853
GRMZM2G158872	1001	3297	0.9348	72.4498
GRMZM2G329144	1001	1018	0.9617	234.644
GRMZM2G038401	999	3100	0.8694	76.8999
GRMZM2G030422	999	4236	0.903	56.2771
GRMZM2G044337	998	1815	0.9631	131.213
GRMZM2G429113	998	3188	0.8984	74.7024
GRMZM2G006080	997	3172	0.9716	75.004
GRMZM5G851698	997	1304	0.8643	182.448
GRMZM2G406101	996	2952	0.8977	80.5129
GRMZM2G156857	995	1188	0.9899	199.861
GRMZM2G105019	991	1745	0.8195	135.519
GRMZM2G048912	990	4010	0.7958	58.9133
GRMZM2G099860	990	4077	0.8563	57.9451
GRMZM2G010987	988	2072	0.8523	113.786
GRMZM2G088290	988	834	0.9257	282.692
GRMZM2G098496	987	1435	0.9324	164.13
GRMZM2G333980	986	1449	0.8765	162.379
GRMZM2G015804	985	2196	0.9982	107.035
GRMZM2G111666	985	2440	0.9455	96.3316
GRMZM2G145088	984	4169	0.9758	56.323
GRMZM2G432722	984	3203	0.9975	73.3095
GRMZM2G127101	984	2362	0.9208	99.4117
GRMZM2G022279	983	1809	0.9425	129.669
GRMZM2G144155	983	2881	0.9542	81.4203
GRMZM5G877316	982	1762	0.9535	132.993
GRMZM2G134396	982	2969	0.966	78.9266
GRMZM2G134134	982	1607	0.7841	145.82
GRMZM2G093405	981	2002	0.8037	116.93
GRMZM2G077233	980	3870	0.5341	60.4279
GRMZM2G085078	980	7057	0.8529	33.1381
GRMZM2G116658	979	3968	0.9312	58.8753
GRMZM2G173067	979	1987	0.8727	117.573
GRMZM2G156599	977	2536	0.9562	91.9322
GRMZM2G027782	977	1720	0.9663	135.547
AC217401.3	977	2060	0.9238	113.175
GRMZM2G128491	977	1264	0.9462	184.446
GRMZM2G124175	976	1817	0.7386	128.179
GRMZM2G320175	976	2280	0.2285	102.15
GRMZM2G060702	976	2272	0.3671	102.509
AC205703.4	975	3462	0.9315	67.2047
GRMZM2G116427	975	1276	0.9812	182.338
GRMZM2G153138	973	3673	0.7337	63.2141
GRMZM2G168375	973	1528	0.9424	151.954
GRMZM2G009045	972	1667	0.88	139.14
AC211394.4	971	1980	0.9864	117.024
GRMZM2G138907	971	1809	0.895	128.086
GRMZM2G135570	970	1121	0.8769	206.485
GRMZM2G014136	970	2489	0.9771	92.997
GRMZM2G365035	968	2003	0.9546	115.323
GRMZM2G057576	968	5731	0.8763	40.3058
GRMZM2G174708	967	1055	0.9725	218.724
GRMZM2G467893	966	2424	0.8626	95.097
GRMZM5G836222	965	1247	0.9206	184.664
GRMZM5G845736	965	843	0.6987	273.163
GRMZM2G163849	965	7070	0.8945	32.5709
GRMZM2G159744	964	4590	0.9331	50.1172
GRMZM2G022403	961	841	0.3139	272.678
GRMZM2G073155	961	600	0.8983	382.203
AC234152.1	961	2337	0.9679	98.1266
GRMZM2G137037	960	1179	0.9737	194.303
GRMZM2G157061	959	3109	0.953	73.6072
GRMZM2G048883	957	2928	0.9057	77.9943
GRMZM2G152853	954	1815	0.9444	125.428
GRMZM2G175779	953	2750	0.9465	82.6956
GRMZM2G350802	952	2316	0.9801	98.0891
AC214448.3	951	1353	0.9734	167.728
GRMZM2G471142	949	2132	0.9278	106.219
GRMZM2G404375	946	2344	0.6237	96.3065
GRMZM2G084465	945	1714	0.5321	131.566
GRMZM2G009464	944	2224	0.8705	101.288
GRMZM2G119886	944	2003	0.9116	112.464
GRMZM2G092468	941	1250	0.9536	179.64
GRMZM2G157470	941	1673	0.8912	134.22
GRMZM2G087598	940	2872	0.8196	78.1026
GRMZM2G153615	938	2557	0.8721	87.5375
GRMZM2G179737	938	1565	0.954	143.025
GRMZM2G034362	938	3733	0.9896	59.9608
GRMZM2G044027	938	2234	0.6056	100.194
GRMZM2G004382	937	2076	0.9128	107.705
GRMZM2G028914	936	2713	0.8824	82.3281
GRMZM2G006130	936	3931	0.4202	56.8192
GRMZM2G126038	935	2781	0.84	80.2293
GRMZM2G177668	935	1916	0.9139	116.45
GRMZM2G102760	933	3292	0.8824	67.6307
GRMZM2G038636	932	1630	0.8963	136.443
GRMZM2G479340	931	1683	0.9364	132.004
GRMZM2G038217	928	1513	0.6563	146.363
GRMZM2G021427	925	1416	0.7302	155.884
GRMZM2G052869	924	1266	0.6256	174.165
GRMZM2G055585	924	1700	0.9912	129.702
GRMZM2G162486	921	1383	0.786	158.913
GRMZM2G161868	919	2068	0.6779	106.044
GRMZM2G126453	917	3171	0.9615	69.0073
GRMZM2G033208	915	3653	0.7115	59.7714
GRMZM2G090300	914	2144	0.9142	101.729
GRMZM2G004511	912	1443	0.8399	150.817
GRMZM2G139041	911	2318	0.9081	93.7837
GRMZM5G822237	909	1029	0.516	210.8
GRMZM2G001116	909	2456	0.956	88.3197
GRMZM2G105387	909	2247	0.5287	96.5346
GRMZM2G401664	909	1827	0.9475	118.726
GRMZM2G095593	909	1348	0.865	160.915
GRMZM2G053781	908	2354	0.952	92.0453
GRMZM2G035584	908	1910	0.8681	113.442
GRMZM2G107116	908	4665	0.9432	46.4469
GRMZM2G038001	907	2513	0.9845	86.1265
GRMZM2G095955	902	2344	0.8323	91.8272
GRMZM2G133129	902	610	0.8492	352.857
GRMZM2G088309	902	1228	0.864	175.279
GRMZM2G314546	899	5264	0.8841	40.7536
GRMZM2G460383	899	2134	0.7512	100.528
GRMZM2G027875	898	2942	0.8973	72.8376
GRMZM2G126062	898	1917	0.65	111.783
GRMZM5G877388	898	1393	0.6619	153.832
GRMZM2G148904	898	1528	0.7565	140.241
GRMZM2G074906	898	5484	0.6606	39.0752
GRMZM2G415215	897	7897	0.9202	27.1052
GRMZM2G162426	896	3685	0.9484	58.022
GRMZM2G140667	894	1312	0.75	162.602
GRMZM2G317584	894	2458	0.9353	86.7916
GRMZM2G113408	894	2677	0.7493	79.6914
GRMZM2G144653	894	771	0.9585	276.698
GRMZM2G079661	893	1504	0.6955	141.686
GRMZM2G163154	891	2245	0.9991	94.7073
GRMZM2G095124	891	3204	0.9641	66.3602
GRMZM2G440925	890	1844	0.7549	115.173
GRMZM2G166694	890	3274	0.8491	64.8685
GRMZM2G027451	889	2035	0.5744	104.246
GRMZM2G324471	888	1502	0.8808	141.08
GRMZM2G149281	888	2058	0.6851	102.965
GRMZM2G327357	887	2447	0.9845	86.4992
GRMZM2G085530	886	3503	0.9109	60.3554
GRMZM2G127087	885	2017	0.9217	104.703
GRMZM2G101760	885	3453	0.9337	61.1602
GRMZM2G122230	884	930	0.9226	226.825
GRMZM2G460396	884	4396	0.8321	47.9863
GRMZM2G001457	881	2993	0.9739	70.2411
GRMZM2G134806	880	1359	0.8734	154.52
GRMZM2G312110	880	8706	0.9023	24.1205
GRMZM2G019246	880	2381	0.8832	88.1953
GRMZM2G118037	880	939	0.8062	223.635
GRMZM2G458728	879	3524	0.9282	59.5217
GRMZM2G346455	879	1710	0.9146	122.663
GRMZM2G113129	878	2567	0.9899	81.6189
GRMZM2G070961	877	2763	0.9121	75.7427
AC215690.3	876	1179	0.9958	177.302
GRMZM2G024887	876	1040	0.9442	200.999
GRMZM2G093900	875	2095	0.7928	99.6658
GRMZM2G167932	875	1794	0.898	116.388
GRMZM2G024612	875	8129	0.9182	25.6858
GRMZM2G140811	873	2805	0.9622	74.2683
GRMZM2G354610	872	2247	0.8625	92.6053
GRMZM2G174757	872	2533	0.9317	82.1492
GRMZM2G175874	871	2922	0.7906	71.1312
GRMZM2G047093	869	3465	0.9726	59.8465
GRMZM2G083847	869	2314	0.8003	89.6146
GRMZM2G321870	869	2037	0.9676	101.801
GRMZM5G896560	868	879	0.9352	235.642
GRMZM2G127117	868	1498	0.988	138.271
GRMZM2G150772	868	5204	0.9917	39.802
GRMZM2G006765	867	1682	0.953	123.003
GRMZM2G106960	867	1415	0.7152	146.213
GRMZM2G375904	867	2600	0.8696	79.5734
GRMZM2G024571	867	4598	0.9037	44.9958
GRMZM2G374574	864	6139	0.9542	33.5845
GRMZM2G113592	863	3578	0.9413	57.5563
GRMZM2G116034	863	2541	0.7013	81.0454
GRMZM2G099481	862	3628	0.9537	56.6973
GRMZM2G448607	862	1365	0.8674	150.694
GRMZM2G086496	862	2492	0.9651	82.5432
GRMZM2G101446	861	1182	0.6641	173.823
GRMZM2G002825	861	1377	0.6057	149.208
GRMZM2G080183	860	1811	0.8029	113.319
GRMZM2G035213	857	1532	0.7807	133.489
GRMZM2G462635	857	959	0.952	213.248
GRMZM2G111818	857	3859	0.928	52.9942
GRMZM2G328988	856	5489	0.8694	37.2137
GRMZM2G162755	855	1880	0.9564	108.525
GRMZM2G164562	855	1671	0.9779	122.099
GRMZM2G354558	853	1730	0.9809	117.659
GRMZM2G150295	852	1849	0.5484	109.958
GRMZM2G101523	852	3573	0.9961	56.9022
GRMZM2G096585	852	2301	0.8844	88.3579
GRMZM2G118345	850	2934	0.8299	69.1323
GRMZM2G014805	850	4173	0.9521	48.6063
GRMZM2G050570	849	1967	0.9939	102.997
GRMZM2G057380	847	4903	0.8564	41.2234
GRMZM2G112579	846	1753	0.7998	115.162
GRMZM2G001500	845	2654	0.9359	75.9763
GRMZM2G044498	845	1310	0.9122	153.924
GRMZM2G017835	844	2651	0.9755	75.9722
GRMZM2G050193	844	2100	0.9543	95.9059
GRMZM2G110423	842	2152	0.9187	93.3667
GRMZM2G016323	842	3574	0.9085	56.2186
GRMZM2G180328	842	1420	0.9437	141.497
GRMZM2G310283	841	4654	0.9645	43.1213
GRMZM2G341271	841	3160	0.931	63.5084
GRMZM2G334628	840	3000	0.4477	66.816
GRMZM2G155384	838	3343	0.9106	59.8177
GRMZM2G044132	837	1451	0.0365	137.651
GRMZM2G127141	836	1761	0.8938	113.284
GRMZM2G051879	836	1155	0.639	172.722
GRMZM2G165357	836	2098	0.6988	95.0874
GRMZM2G347056	836	2375	0.9263	83.9972
GRMZM2G131334	835	2848	0.9364	69.963
GRMZM2G077307	833	3454	0.9331	57.5499
GRMZM2G013619	832	1762	0.71	112.678
GRMZM2G181551	832	1534	0.7419	129.426
GRMZM2G169005	831	1345	0.8743	147.435
GRMZM2G137839	831	1354	0.7954	146.455
GRMZM2G156068	830	1230	0.8805	161.026
GRMZM2G161154	829	837	0.7491	236.348
GRMZM2G155357	828	2048	0.9868	96.4767
GRMZM2G164020	827	1622	0.7281	121.668
GRMZM5G846339	826	1970	0.9685	100.054
AC212835.3	826	1930	0.7585	102.128
GRMZM2G058305	825	2479	0.7003	79.4145
GRMZM2G019999	824	1618	0.8962	121.526
GRMZM2G011355	822	1739	0.3715	112.796
GRMZM2G101859	822	913	0.8773	214.844
GRMZM2G110922	821	1656	0.9263	118.306
GRMZM2G087233	821	1380	0.6935	141.967
GRMZM2G161611	820	1758	0.9005	111.306
GRMZM2G305046	820	997	0.7533	196.264
GRMZM5G806387	820	866	0.8256	225.953
GRMZM2G045239	819	954	0.9811	204.86
GRMZM2G057674	819	2666	0.8207	73.3071
GRMZM2G065083	816	1047	0.8921	185.98
GRMZM2G150367	816	1325	0.8453	146.959
AC149475.2	816	4569	0.7135	42.6178
GRMZM2G068715	816	1269	0.9141	153.444
GRMZM2G335521	814	1015	0.9064	191.373
GRMZM2G010363	814	1789	0.8927	108.577
GRMZM2G084587	814	1222	0.1743	158.955
GRMZM2G314769	813	1145	0.7424	169.437
GRMZM2G000278	813	1759	0.8852	110.293
GRMZM2G114681	812	1737	0.9752	111.552
GRMZM2G164663	812	2593	0.8862	74.7267
AC207342.3	812	1029	0.9981	188.305
GRMZM2G310431	812	2581	0.7927	75.0741
GRMZM2G084063	811	1162	0.5207	166.547
GRMZM2G006377	809	2258	0.9194	85.4962
GRMZM5G858454	809	3201	0.7507	60.3094
GRMZM2G169329	808	1116	0.8683	172.77
GRMZM2G048172	808	2337	0.8943	82.504
GRMZM2G447632	807	869	0.3774	221.603
GRMZM2G181236	806	1983	0.8966	96.9917
GRMZM2G039455	806	3704	0.8904	51.9262
GRMZM2G051782	805	1757	0.9306	109.332
GRMZM2G060213	805	3967	0.9246	48.4235
GRMZM2G041448	805	501	0.9242	383.425
GRMZM5G817964	803	2145	0.9347	89.3327
GRMZM2G151903	803	2209	0.9493	86.7445
GRMZM2G413897	802	1030	0.899	185.806
GRMZM2G003963	801	1730	0.8786	110.486
GRMZM2G338259	801	3192	0.7917	59.8814
GRMZM2G538064	800	1760	0.9869	108.467
GRMZM2G158835	800	1307	0.899	146.062
GRMZM2G084149	797	1880	0.9739	101.163
GRMZM2G083418	797	1746	0.858	108.927
GRMZM2G061096	796	2608	0.9283	72.8329
GRMZM2G092129	795	2044	0.9848	92.8129
GRMZM2G078143	795	1948	0.886	97.3869
GRMZM2G112805	795	1357	0.9617	139.801
GRMZM2G358827	795	3647	0.8451	52.018
GRMZM5G889999	793	2930	0.9314	64.5844
GRMZM2G324903	793	1291	0.9667	146.578
GRMZM2G005562	792	2629	0.798	71.8881
AC190609.3	792	2085	0.8273	90.6445
GRMZM2G137321	791	1896	0.9694	99.5544
GRMZM2G018372	790	3916	0.7066	48.1401
GRMZM2G406830	790	3654	0.9327	51.5918
GRMZM2G152041	790	817	0.9621	230.742
GRMZM2G131473	789	1922	0.9547	97.9593
GRMZM2G462140	789	1704	0.9173	110.492
GRMZM2G095280	787	1823	0.9495	103.017
GRMZM2G099355	787	7504	0.8433	25.0267
GRMZM2G168898	784	1044	0.9061	179.2
GRMZM2G036765	783	2793	0.9062	66.898
GRMZM2G035741	783	1780	0.7551	104.97
GRMZM2G103617	783	816	0.8248	228.978
GRMZM2G007404	782	1817	0.6181	102.701
GRMZM2G166035	782	1751	0.8572	106.572
GRMZM5G803952	780	970	0.9351	191.887
GRMZM2G568636	779	3247	0.9495	57.2503
GRMZM2G143046	778	1315	0.9574	141.181
GRMZM2G028129	778	1911	0.8566	97.1496
GRMZM2G180951	778	3220	0.9866	57.6562
GRMZM2G136300	778	1924	0.9595	96.4932
GRMZM5G826911	777	2219	0.8598	83.5576
GRMZM2G043291	777	1579	0.8062	117.425
GRMZM2G166646	776	2051	0.9634	90.2856
GRMZM2G100288	776	3368	0.8679	54.9809
GRMZM2G010048	776	946	0.9218	195.746
GRMZM5G813470	775	2430	0.9173	76.1058
GRMZM2G161512	775	1948	0.9671	94.9369
GRMZM2G459746	774	3369	0.8578	54.8229
GRMZM2G091456	773	2203	0.9083	83.7312
GRMZM2G083058	772	2316	0.959	79.5428
GRMZM2G125893	772	935	0.8193	197.028
GRMZM2G105004	772	3979	0.8824	46.2984
GRMZM2G166089	771	2796	0.932	65.8021
GRMZM2G048434	771	1931	0.8912	95.2784
GRMZM2G128641	770	3041	0.9513	60.4222
GRMZM2G394827	769	1270	0.7079	144.492
GRMZM2G025832	769	1891	0.9513	97.0414
GRMZM2G181362	769	3731	0.9526	49.1839
GRMZM2G114162	769	6466	0.8869	28.38
GRMZM2G058227	768	1610	0.8652	113.83
GRMZM2G113655	767	2048	0.8906	89.3692
GRMZM2G447745	767	5941	0.8889	30.8076
GRMZM2G009136	764	1864	0.8246	97.8069
GRMZM2G019919	763	2910	0.9859	62.5682
AC199526.5	763	2259	0.2665	80.5992
GRMZM2G171387	762	1005	0.799	180.93
GRMZM2G065012	761	4197	0.5185	43.2681
GRMZM2G089409	761	924	0.7078	196.533
GRMZM5G873455	760	761	0.9041	238.315
GRMZM2G107082	758	1660	0.9398	108.964
GRMZM2G101480	757	1195	0.6184	151.165
AC155377.1	757	5390	0.9525	33.5142
GRMZM2G125271	755	1178	0.843	152.941
GRMZM2G134367	754	1810	0.9773	99.4066
GRMZM2G353497	754	1612	0.6284	111.617
GRMZM2G181359	751	1723	0.9733	104.01
GRMZM2G140726	751	2879	0.8458	62.2473
GRMZM5G827266	748	1042	0.4107	171.3
GRMZM2G138419	748	3753	0.955	47.5604
GRMZM2G095895	747	721	0.9279	247.234
GRMZM2G469523	746	1126	0.9387	158.097
GRMZM2G176707	746	2125	0.8329	83.7726
GRMZM2G045664	746	914	0.9376	194.767
GRMZM2G105787	746	2176	0.8805	81.8092
GRMZM2G153393	745	2703	0.8986	65.7707
GRMZM2G028313	745	2249	0.8822	79.0477
GRMZM2G150932	743	2365	0.8858	74.9687
GRMZM2G087625	742	2158	0.9588	82.0493
GRMZM2G088371	742	606	0.934	292.182
GRMZM2G085833	741	2580	0.9442	68.5363
GRMZM2G006297	741	3023	0.9947	58.4928
GRMZM2G158595	741	2239	0.9741	78.9744
GRMZM2G134668	741	2362	0.8891	74.8618
GRMZM2G130230	740	2115	0.8019	83.4918
GRMZM2G048549	740	1933	0.925	91.3529
GRMZM2G013318	740	2511	0.9395	70.3246
GRMZM2G063792	739	2267	0.9281	77.7885
GRMZM2G135186	738	1865	0.8799	94.4278
GRMZM2G073079	738	1241	0.4762	141.908
GRMZM2G179523	737	2591	0.9707	67.8769
GRMZM2G044306	736	6143	0.932	28.5904
GRMZM2G305115	735	2131	0.7902	82.305
GRMZM2G099657	735	1683	0.7564	104.214
GRMZM2G045275	735	3050	0.9325	57.5055
GRMZM2G125544	734	2148	0.9413	81.5425
GRMZM2G097129	734	939	0.8914	186.532
GRMZM2G060937	733	778	0.8766	224.826
GRMZM2G063851	733	2313	0.8474	75.6224
GRMZM2G138516	733	2072	0.9633	84.4183
GRMZM2G308064	733	3722	0.9605	46.9948
GRMZM2G089406	733	5242	0.9836	33.3679
GRMZM2G062914	732	1779	0.9337	98.1878
GRMZM2G400714	731	1765	0.6759	98.8314
GRMZM2G119696	731	3725	0.8526	46.8288
GRMZM2G147716	731	1522	0.8555	114.611
GRMZM2G071790	730	1927	0.8557	90.3989
GRMZM2G066923	729	1708	0.9637	101.85
GRMZM2G180372	729	1705	0.9308	102.029
GRMZM5G813206	729	4110	0.9345	42.3261
GRMZM2G092451	728	2603	0.8963	66.739
GRMZM5G862540	728	1975	0.9696	87.9603
GRMZM2G012263	728	1603	0.9775	108.373
GRMZM2G113202	727	3966	0.8558	43.7425
GRMZM2G023387	727	1417	0.8553	122.43
GRMZM2G055698	727	1882	0.5988	92.1801
GRMZM2G155123	726	3632	0.9562	47.6994
GRMZM2G062554	726	2106	0.6519	82.2622
GRMZM2G150256	725	1894	0.9667	91.3441
GRMZM2G117513	725	1398	0.9206	123.752
GRMZM2G098346	725	1685	0.9958	102.674
GRMZM2G167613	725	1419	0.9563	121.921
GRMZM2G002898	725	2176	0.8387	79.5063
GRMZM2G159295	724	1759	0.9608	98.2189
GRMZM2G059015	724	3300	0.9267	52.3536
GRMZM2G169182	723	2782	0.8875	62.016
GRMZM2G162786	723	2585	0.9145	66.7421
AC233895.1	722	1185	0.9941	145.392
AC233959.1	721	984	0.998	174.849
GRMZM2G030784	721	1700	0.7153	101.207
GRMZM2G108153	720	1701	0.8178	101.007
GRMZM2G150014	719	1642	0.8861	104.491
GRMZM2G372180	719	3177	0.95	54.005
GRMZM2G120563	719	5542	0.4897	30.9588
GRMZM2G127948	718	1815	0.6149	94.3996
GRMZM2G145396	718	1906	0.6516	89.8926
GRMZM2G001895	718	6485	0.9021	26.4202
GRMZM2G158568	717	2285	0.4363	74.8782
GRMZM5G817886	717	2117	0.8479	80.8203
GRMZM2G082924	717	968	0.8626	176.753
GRMZM2G145972	716	2311	0.968	73.9325
GRMZM2G141432	716	1560	0.5096	109.524
GRMZM2G134980	716	1813	0.5792	94.2405
GRMZM2G163888	716	3110	0.9058	54.9383
GRMZM2G079823	715	2709	0.983	62.9824
GRMZM2G010637	715	6355	0.7937	26.848
GRMZM2G478709	715	2407	0.8833	70.8846
GRMZM2G118355	714	1120	0.6562	152.126
GRMZM2G351018	713	4688	0.8948	36.2931
GRMZM2G064695	713	1952	0.8478	87.163
GRMZM2G109009	713	3222	0.9649	52.8064
GRMZM2G434173	713	2497	0.7609	68.1386
GRMZM2G142757	713	1336	0.9828	127.352
GRMZM2G058310	713	2047	0.6019	83.1178
GRMZM2G093526	712	2425	0.7918	70.0633
GRMZM2G080940	710	2142	0.8585	79.0972
GRMZM2G024484	710	2024	0.9392	83.7086
GRMZM2G160428	708	2823	0.9412	59.8473
GRMZM2G004997	707	2388	0.9376	70.6492
GRMZM5G899308	707	1828	0.9732	92.2923
GRMZM2G397242	707	861	0.8688	195.947
GRMZM2G015132	707	2269	0.9343	74.3545
GRMZM2G006468	706	2844	0.8288	59.2376
GRMZM2G018275	705	1393	0.9641	120.77
GRMZM2G418644	705	2334	0.2009	72.0793
GRMZM5G885644	704	2853	0.9565	58.8834
GRMZM2G156673	704	1736	0.5219	96.771
GRMZM2G420882	704	2963	0.975	56.6974
GRMZM2G023232	704	3133	0.9218	53.6209
GRMZM2G308687	703	1601	0.669	104.782
GRMZM5G881464	702	3191	0.9094	52.4968
GRMZM2G016655	702	2767	0.9668	60.5411
GRMZM2G078500	702	1420	0.9746	117.97
GRMZM2G045241	702	2155	0.9513	77.7342
GRMZM2G136803	701	1816	0.9758	92.1137
GRMZM2G089501	701	2621	0.7867	63.8224
GRMZM2G080871	701	2388	0.6147	70.0496
GRMZM2G367834	700	1929	0.959	86.594
GRMZM2G124886	699	3688	0.901	45.2281
GRMZM2G127949	699	2424	0.9604	68.8124
GRMZM2G416484	698	3664	0.9239	45.4592
GRMZM2G145460	698	1952	0.9426	85.3292
GRMZM2G130889	698	2503	0.8398	66.5452
GRMZM2G423456	695	4319	0.8947	38.3993
GRMZM2G108780	694	1223	0.6051	135.411
GRMZM5G887631	693	2793	0.8983	59.2086
GRMZM2G126865	693	2598	0.6963	63.6526
GRMZM2G012416	693	1960	0.9173	84.3722
GRMZM2G055643	693	2104	0.8645	78.5977
GRMZM2G005849	693	2647	0.9584	62.4743
GRMZM2G003565	692	2107	0.8462	78.3725
GRMZM2G049347	692	2142	0.9613	77.0919
GRMZM2G123537	691	3884	0.9627	42.4542
GRMZM2G135470	691	2085	0.8854	79.085
GRMZM2G345717	691	2839	0.5181	58.0811
GRMZM2G094928	689	1733	0.5649	94.8731
GRMZM2G027851	689	2654	0.9213	61.9499
GRMZM5G821988	688	2262	0.9819	72.5802
GRMZM2G113409	688	3239	0.9639	50.6874
GRMZM2G109039	688	2062	0.8472	79.62
GRMZM2G100146	688	1366	0.8748	120.188
GRMZM2G018716	688	2182	0.9606	75.2412
GRMZM5G864266	687	4070	0.858	40.2795
GRMZM2G089698	687	1746	0.9754	93.8933
GRMZM2G040296	687	5332	0.9405	30.746
GRMZM2G117755	686	1456	0.8846	112.431
GRMZM2G468260	686	2615	0.7403	62.6
GRMZM2G428391	686	2628	0.8832	62.2904
GRMZM2G113512	685	3272	0.8976	49.9574
GRMZM2G074611	685	826	0.9286	197.894
GRMZM2G052434	685	2921	0.9476	55.9605
GRMZM2G154366	685	4384	0.9181	37.2857
GRMZM2G009936	683	1048	0.5735	155.518
GRMZM2G139073	683	1449	0.8765	112.48
AC207890.3	682	2961	0.9743	54.9627
GRMZM2G063060	682	2890	0.8374	56.313
GRMZM2G063435	682	1860	0.8742	87.4971
GRMZM2G137046	681	861	0.9605	188.741
GRMZM2G002391	681	1629	0.9724	99.7581
GRMZM2G074743	681	1491	0.9162	108.991
GRMZM2G467169	680	3479	0.9615	46.642
GRMZM2G433959	679	1171	0.8873	138.368
GRMZM2G179432	679	1560	0.8763	103.865
GRMZM2G045090	679	4092	0.9814	39.5965
GRMZM5G836378	678	1727	0.8413	93.6827
GRMZM2G165511	678	1598	0.6258	101.245
GRMZM2G155837	678	3727	0.8575	43.4103
GRMZM2G075333	677	2235	0.9687	72.2825
GRMZM2G088088	677	2476	0.9483	65.247
GRMZM2G161274	676	1214	0.8641	132.877
GRMZM2G081949	675	1660	0.806	97.0327
GRMZM2G172244	675	1097	0.7238	146.832
GRMZM2G019328	675	1089	0.7934	147.91
GRMZM2G074479	674	1837	0.4578	87.5534
GRMZM2G075320	674	4953	0.9233	32.4724
GRMZM2G168096	674	6322	0.9508	25.4406
GRMZM2G018356	673	3397	0.9782	47.2761
GRMZM2G434541	673	573	0.6998	280.274
GRMZM2G151195	673	3905	0.9746	41.126
GRMZM2G083317	672	2756	0.9467	58.1852
GRMZM2G062354	672	2848	0.9213	56.3056
GRMZM2G165944	672	4079	0.9613	39.3131
GRMZM2G007871	671	2375	0.9789	67.4188
GRMZM2G065757	671	2521	0.5105	63.5144
GRMZM2G042089	671	2160	0.9611	74.1295
GRMZM2G038281	671	3426	0.8269	46.7366
GRMZM2G110509	670	1813	0.7027	88.1859
GRMZM2G114126	670	1927	0.8739	82.9689
GRMZM2G336962	669	4693	0.8979	34.0171
GRMZM2G136769	668	2203	0.97	72.3576
GRMZM2G104017	668	1786	0.6601	89.2519
GRMZM2G009232	668	1888	0.696	84.43
GRMZM2G159724	668	2489	0.7895	64.0433
GRMZM2G142088	667	3013	0.8762	52.8261
GRMZM2G330218	667	3956	0.9525	40.2339
GRMZM2G425728	667	1494	0.753	106.536
GRMZM2G082174	667	1994	0.8902	79.8221
GRMZM2G012391	666	2284	0.8533	69.5826
GRMZM2G115775	666	1449	0.7274	109.68
GRMZM2G165998	666	1914	0.4822	83.0337
GRMZM2G079089	666	1409	0.6522	112.794
GRMZM2G098397	666	2134	0.9649	74.4735
GRMZM2G061928	666	1806	0.6257	87.9992
GRMZM2G104294	666	2673	0.8077	59.4562
GRMZM2G033493	666	1536	0.8783	103.468
GRMZM2G099467	665	1617	0.8949	98.1372
GRMZM2G082529	664	3126	0.9296	50.6876
GRMZM2G303631	664	2712	0.6479	58.4253
GRMZM2G022032	663	2668	0.9307	59.2994
GRMZM2G345055	663	3054	0.8824	51.8044
GRMZM2G103137	663	2249	0.8728	70.3471
GRMZM2G146115	663	1730	0.9491	91.4513
GRMZM2G176546	663	1812	0.9111	87.3127
GRMZM2G116700	663	3346	0.9375	47.2835
GRMZM2G107362	662	1790	0.8966	88.2525
GRMZM2G110681	661	1374	0.9774	114.799
GRMZM2G462613	661	3661	0.9019	43.0848
GRMZM2G066222	660	1234	0.5478	127.629
GRMZM2G082185	660	1680	0.822	93.7469
GRMZM2G342246	659	1313	0.8264	119.769
GRMZM2G082203	658	2979	0.804	52.7081
GRMZM2G009845	658	2553	0.9248	61.5031
GRMZM2G414528	657	2436	0.6474	64.3592
GRMZM2G014914	657	1957	0.6096	80.1119
GRMZM2G021331	656	2290	0.8424	68.3582
GRMZM2G300841	655	1706	0.9426	91.6188
GRMZM2G113033	655	1149	0.7554	136.033
AC210013.4	654	1966	0.3652	79.381
GRMZM2G375807	654	3258	0.9312	47.9015
GRMZM2G085111	654	4221	0.8751	36.973
GRMZM2G079682	654	2067	0.9318	75.5022
GRMZM2G117935	653	1219	0.913	127.83
GRMZM2G001327	653	2595	0.4023	60.0479
GRMZM2G384327	653	2122	0.9218	73.4328
GRMZM2G135027	652	1882	0.9107	82.6704
GRMZM2G121683	651	2585	0.8793	60.0956
GRMZM2G054136	651	1362	0.7783	114.058
GRMZM2G140150	651	1822	0.8535	85.2619
GRMZM2G076771	651	2347	0.9523	66.1897
GRMZM2G139617	650	2195	0.8237	70.6645
GRMZM2G025322	650	1091	0.8469	142.171
GRMZM2G050647	649	3770	0.8565	41.0795
GRMZM2G010884	649	1676	0.79	92.4045
GRMZM2G345840	649	2795	0.9907	55.4096
GRMZM5G840955	649	1263	0.9216	122.621
GRMZM2G455557	649	3465	0.8597	44.6955
GRMZM2G141587	648	3353	0.9517	46.1173
GRMZM2G137348	648	3537	0.8343	43.7182
GRMZM2G093032	648	1980	0.9429	78.0966
GRMZM2G055619	647	5813	0.7418	26.5599
GRMZM2G336871	647	1347	0.5375	114.62
GRMZM2G102421	646	1529	0.8496	100.82
GRMZM2G061487	646	1569	0.9477	98.2498
GRMZM2G100511	646	2349	0.8335	65.6254
GRMZM2G000531	645	1607	0.8731	95.7781
GRMZM2G146551	645	1175	0.3166	130.992
GRMZM2G094388	645	1213	0.8557	126.888
GRMZM2G031859	644	3239	0.9136	47.4457
GRMZM5G850966	644	596	0.9279	257.847
GRMZM2G058289	643	2640	0.8693	58.1205
GRMZM2G412986	643	1969	0.967	77.9269
GRMZM2G415846	642	2276	0.9785	67.3108
GRMZM2G094123	642	1984	0.9315	77.2175
GRMZM2G112240	641	1675	0.8549	91.3199
GRMZM2G442195	641	2568	0.7819	59.5642
GRMZM2G076239	641	1710	0.8807	89.4508
GRMZM2G114570	641	2689	0.8248	56.8839
GRMZM2G104999	640	1479	0.9391	103.26
GRMZM5G893444	640	2522	0.9397	60.556
GRMZM2G114044	639	1515	0.8917	100.649
GRMZM2G033876	639	4308	0.9508	35.3954
GRMZM2G139513	638	756	0.7103	201.382
GRMZM2G126860	638	2080	0.8851	73.1947
GRMZM2G001676	637	2055	0.9577	73.969
GRMZM2G133919	637	4190	0.6134	36.2784
GRMZM5G835213	637	2521	0.6938	60.296
GRMZM2G115518	636	2504	0.8335	60.6101
GRMZM2G120320	636	1703	0.9413	89.1179
GRMZM2G146267	636	4485	0.8343	33.839
GRMZM2G174990	635	2647	0.8644	57.2456
GRMZM2G010960	635	4930	0.9207	30.7361
GRMZM2G139223	635	1910	0.9168	79.3346
GRMZM5G826714	634	2080	0.9337	72.7358
GRMZM2G146331	634	572	0.8304	264.494
GRMZM2G104418	634	1634	0.9064	92.589
GRMZM2G059179	634	4188	0.9515	36.1247
GRMZM2G169688	634	2801	0.9579	54.013
GRMZM2G127665	633	3914	0.3922	38.5927
GRMZM2G061537	632	2098	0.8684	71.8843
GRMZM2G106650	632	1952	0.7869	77.2609
GRMZM2G019358	632	2353	0.9057	64.094
GRMZM2G395508	631	1827	0.9693	82.4163
GRMZM2G062499	631	1797	0.9672	83.7922
GRMZM2G328094	631	1576	0.8344	95.5422
GRMZM2G167336	631	1874	0.9845	80.3493
GRMZM5G811797	630	2095	0.7986	71.7594
GRMZM2G147724	630	1906	0.9407	78.8751
GRMZM2G347043	629	1685	0.8748	89.0785
GRMZM2G098039	629	3750	0.9432	40.0259
GRMZM2G044457	629	2071	0.8262	72.4758
GRMZM2G336448	629	2233	0.8056	67.2178
GRMZM2G477872	628	4606	0.8888	32.5355
GRMZM2G043932	628	1247	0.6648	120.175
GRMZM2G026143	628	589	0.927	254.429
GRMZM2G015542	628	2915	0.7242	51.4095
GRMZM2G040030	628	1302	0.8794	115.099
GRMZM2G072088	626	4033	0.8683	37.0398
GRMZM2G061906	626	1890	0.8392	79.0378
GRMZM2G020156	626	2071	0.9788	72.1301
GRMZM2G078781	625	3037	0.9239	49.1086
GRMZM2G474459	625	9064	0.126	16.4544
GRMZM2G153815	625	2716	0.88	54.9127
GRMZM2G177659	624	2126	0.9224	70.0396
GRMZM2G153333	624	2324	0.9845	64.0724
GRMZM2G030167	623	1270	0.8213	117.059
GRMZM2G134027	623	2749	0.8774	54.0799
GRMZM2G062076	623	1304	0.7554	114.007
GRMZM2G035985	623	4170	0.7324	35.6512
GRMZM2G168416	622	1381	0.9848	107.478
GRMZM2G002786	622	1226	0.8467	121.066
GRMZM2G312661	622	1852	0.5351	80.1441
GRMZM2G527891	622	3345	0.9073	44.3728
GRMZM2G362883	622	1814	0.9476	81.823
GRMZM2G148930	621	1163	0.8401	127.419
GRMZM2G138074	621	2233	0.8482	66.3629
GRMZM2G110378	621	2004	0.7086	73.9462
GRMZM5G813363	619	1848	0.8577	79.9302
GRMZM2G048129	619	1880	0.891	78.5697
GRMZM2G059590	618	4191	0.8774	35.1879
GRMZM2G107757	618	1566	0.7516	94.1714
GRMZM2G138425	616	3546	0.7532	41.4538
GRMZM2G109056	616	3072	0.8822	47.85
GRMZM2G342327	615	2779	0.8687	52.8091
GRMZM2G395354	614	1258	0.9436	116.469
GRMZM2G168858	614	2830	0.9099	51.7731
GRMZM2G558539	614	1582	0.9191	92.6156
GRMZM5G871013	614	1307	0.622	112.102
GRMZM2G025459	614	1585	0.747	92.4403
GRMZM2G028986	613	968	0.156	151.115
GRMZM2G115491	613	1149	0.9782	127.31
GRMZM2G018398	612	1637	0.8821	89.2124
GRMZM2G036206	612	2822	0.9015	51.7508
GRMZM2G109121	612	2357	0.9092	61.9604
GRMZM2G157564	611	2808	0.9366	51.9238
GRMZM2G122943	611	1608	0.834	90.6729
GRMZM2G179106	611	2788	0.7791	52.2963
GRMZM2G147787	610	1557	0.8658	93.4896
GRMZM2G157621	610	3654	0.8818	39.8367
GRMZM2G027741	610	1846	0.9187	78.8534
GRMZM2G004703	610	1069	0.8428	136.168
GRMZM5G853854	610	1752	0.9172	83.0841
GRMZM2G080274	610	1108	0.7843	131.375
GRMZM2G099745	608	680	0.7294	213.362
GRMZM2G121960	608	5402	0.6923	26.8578
GRMZM2G104081	608	2163	0.9612	67.0763
GRMZM2G407825	607	3749	0.964	38.6363
GRMZM2G031398	607	3585	0.7816	40.4038
GRMZM2G056270	607	1608	0.8526	90.0793
GRMZM2G101938	607	1262	0.8891	114.776
GRMZM2G031107	607	1956	0.9407	74.0529
GRMZM2G077844	607	2363	0.9441	61.2981
GRMZM2G045638	607	784	0.7602	184.754
GRMZM2G104843	607	3430	0.8554	42.2296
GRMZM2G321725	606	2109	0.6719	68.5675
GRMZM2G012052	606	894	0.943	161.755
AC215244.3	606	1558	0.9442	92.817
GRMZM2G469111	605	2745	0.9559	52.5939
GRMZM2G159013	605	1913	0.9462	75.468
GRMZM2G318475	605	1400	0.8529	103.122
GRMZM2G450163	605	2430	0.8728	59.4116
GRMZM2G031028	604	1492	0.9511	96.6029
AC217358.3	604	1935	0.7788	74.4866
GRMZM2G424857	604	3412	0.5815	42.2426
GRMZM2G104118	604	2105	0.895	68.4711
GRMZM2G141784	603	1796	0.9527	80.1186
GRMZM5G813627	603	2417	0.9193	59.5337
GRMZM2G389362	603	2151	0.9307	66.8958
GRMZM2G085747	601	2863	0.8432	50.0928
GRMZM2G102596	601	1403	0.7862	102.221
GRMZM2G392975	601	1674	0.779	85.6725
GRMZM2G145104	600	3715	0.8431	38.5403
GRMZM2G458549	600	2186	0.8028	65.4973
GRMZM2G080375	600	2235	0.8635	64.0613
GRMZM2G352431	600	6054	0.9073	23.65
AC235535.1	599	3342	0.9207	42.7703
GRMZM2G136170	599	3099	0.9929	46.1241
GRMZM2G059825	599	1852	0.9503	77.1806
GRMZM2G400173	599	3783	0.8781	37.7844
GRMZM2G005444	599	2346	0.9599	60.9286
GRMZM2G426917	599	3014	0.8461	47.4248
GRMZM5G856297	599	1568	0.6237	91.1597
GRMZM2G077752	599	1786	0.8919	80.0327
GRMZM2G345725	599	3182	0.9349	44.9209
GRMZM2G056221	598	963	0.9865	148.183
GRMZM2G069009	598	2360	0.936	60.466
GRMZM2G047274	597	1806	0.9225	78.8822
GRMZM2G039841	596	1253	0.8276	113.506
GRMZM2G010342	596	5035	0.9474	28.2468
GRMZM5G892645	595	2111	0.9043	67.2591
GRMZM2G353444	595	1972	0.966	72
GRMZM2G079777	595	1497	0.9365	94.8456
GRMZM2G366146	595	3921	0.9179	36.2112
GRMZM2G108829	595	2734	0.6898	51.9327
GRMZM2G106590	595	2121	0.8562	66.942
GRMZM2G046900	595	1832	0.5622	77.5021
GRMZM5G876379	594	1783	0.9125	79.4982
GRMZM2G108277	594	1716	0.4266	82.6022
GRMZM2G167031	594	3671	0.9028	38.6122
GRMZM2G153722	594	6166	0.9029	22.9882
GRMZM2G165926	593	3105	0.487	45.5738
GRMZM2G164352	592	2271	0.9472	62.2052
GRMZM2G003385	592	2321	0.7579	60.8652
GRMZM2G104920	592	2450	0.9469	57.6604
GRMZM2G431156	592	938	0.9478	150.606
GRMZM2G070199	592	1471	0.533	96.0354
GRMZM2G176698	592	4892	0.8383	28.8774
GRMZM5G863596	591	3138	0.8792	44.9425
GRMZM2G143354	591	2108	0.9265	66.902
GRMZM2G152421	591	2024	0.7871	69.6786
GRMZM2G119930	591	1935	0.8899	72.8834
GRMZM2G133937	591	5468	0.9323	25.7918
GRMZM2G031824	591	2157	0.9383	65.3822
GRMZM2G159369	590	1798	0.6958	78.3041
GRMZM2G077127	590	2494	0.66	56.4518
GRMZM2G150406	590	2176	0.9062	64.7017
GRMZM2G134930	590	2213	0.9123	63.6199
GRMZM5G820122	590	3366	0.8969	41.8273
GRMZM2G700683	590	3904	0.8673	36.0632
GRMZM2G055331	589	3938	0.9033	35.6913
AC199541.4	589	1645	0.3745	85.442
GRMZM2G109743	589	1519	0.7064	92.5294
GRMZM2G056569	589	1734	0.9625	81.0566
GRMZM2G057535	588	1890	0.8905	74.24
GRMZM2G438551	588	1002	0.7365	140.033
GRMZM2G335287	587	5545	0.903	25.2615
GRMZM2G066191	587	2140	0.6836	65.4556
GRMZM2G436593	587	1650	0.9503	84.8939
GRMZM2G106263	587	2270	0.7626	61.707
GRMZM2G124307	587	1021	0.9148	137.194
GRMZM2G140339	587	1707	0.9848	82.0591
GRMZM2G109821	586	3109	0.3976	44.9779
GRMZM2G042118	586	1393	0.5994	100.385
GRMZM2G141355	586	3120	0.9705	44.8193
GRMZM2G134797	586	1237	0.7049	113.045
GRMZM2G170843	585	2363	0.9475	59.0764
GRMZM2G118731	584	1765	0.9756	78.957
GRMZM2G422464	584	6222	0.911	22.3978
GRMZM2G019267	584	2431	0.7515	57.3258
GRMZM2G108766	584	1855	0.8997	75.1262
GRMZM2G119782	583	861	0.899	161.58
GRMZM2G361256	583	4649	0.923	29.9248
GRMZM2G022061	583	2476	0.9382	56.1876
GRMZM5G871143	583	3296	0.9026	42.2089
GRMZM2G301934	582	1977	0.648	70.2487
GRMZM2G416069	582	2003	0.9026	69.3369
GRMZM2G025992	581	1570	0.6057	88.3077
GRMZM2G150484	581	3373	0.879	41.1038
GRMZM2G102000	580	3603	0.8929	38.4137
GRMZM2G143651	580	2232	0.6725	62.0092
GRMZM2G003642	580	1162	0.7952	119.109
GRMZM2G103345	579	2775	0.7398	49.7895
GRMZM2G042992	579	4464	0.8703	30.9511
GRMZM2G014180	579	2022	0.9411	68.3313
GRMZM5G896731	579	1550	0.4019	89.1393
GRMZM2G449681	578	2243	0.9082	61.4923
GRMZM2G065928	578	2286	0.8539	60.3356
GRMZM2G059299	577	1483	0.9892	92.8447
GRMZM2G059836	576	831	0.941	165.403
GRMZM2G047139	576	2283	0.7372	60.2059
GRMZM2G410393	576	6466	0.7079	21.2573
GRMZM2G472428	576	6423	0.9141	21.3997
GRMZM5G824944	575	2344	0.8793	58.5373
GRMZM2G473001	575	3540	0.8726	38.7603
GRMZM2G130558	574	2024	0.6947	67.6743
GRMZM2G348512	574	1636	0.709	83.7242
GRMZM2G177263	574	1661	0.7971	82.464
GRMZM2G416308	574	2507	0.9039	54.6361
GRMZM2G000816	574	1854	0.8646	73.8796
GRMZM2G027272	574	1979	0.9252	69.2131
GRMZM2G172369	573	3453	0.8978	39.5986
GRMZM2G170281	573	2502	0.9708	54.6499
GRMZM2G155836	573	1304	0.7216	104.857
GRMZM2G111846	573	7881	0.8153	17.3498
GRMZM2G012041	572	3955	0.9484	34.5121
GRMZM2G044143	572	8574	0.827	15.9197
GRMZM2G166658	572	2272	0.8618	60.0772
GRMZM2G045976	572	1831	0.9099	74.547
GRMZM2G175562	571	1568	0.7538	86.8985
GRMZM2G129954	571	1513	0.7832	90.0574
GRMZM2G147687	571	2959	0.7955	46.0483
GRMZM2G426156	570	2585	0.8685	52.6183
GRMZM2G113062	570	1875	0.9029	72.5431
GRMZM2G051792	570	3803	0.888	35.766
GRMZM2G083243	570	2010	0.8716	67.6708
GRMZM2G077809	569	2304	0.9193	58.9321
GRMZM2G099187	569	2931	0.6366	46.3253
GRMZM2G081812	569	1699	0.9423	79.9174
GRMZM2G111903	569	5206	0.7196	26.0814
GRMZM2G394259	569	2278	0.1822	59.6047
GRMZM2G098239	569	2246	0.6848	60.454
GRMZM2G471269	569	2159	0.6693	62.89
GRMZM2G123540	569	1899	0.9768	71.5006
GRMZM2G133173	569	2715	0.8711	50.0109
GRMZM5G887054	568	1182	0.8029	114.671
GRMZM5G814314	568	1963	0.6439	69.0479
GRMZM2G016858	567	3329	0.8916	40.6435
GRMZM2G168629	567	4460	0.8632	30.3368
GRMZM2G035557	566	883	0.9241	152.96
GRMZM2G087719	565	2372	0.6071	56.8403
GRMZM2G084521	564	1433	0.6643	93.9194
GRMZM5G893252	564	889	0.9471	151.391
GRMZM2G079013	564	3062	0.9484	43.9538
GRMZM2G100913	564	2297	0.9534	58.5923
GRMZM2G443668	563	3947	0.9009	34.038
GRMZM2G005710	563	1285	0.8755	104.551
GRMZM2G062953	563	2619	0.9416	51.2974
GRMZM2G109472	563	4100	0.7495	32.7678
GRMZM2G132796	562	2659	0.8703	50.436
GRMZM2G151122	562	2272	0.7698	59.0269
GRMZM2G029583	562	1943	0.8224	69.0217
GRMZM2G425863	562	1700	0.7253	78.8878
GRMZM2G014452	562	2360	0.9386	56.8259
GRMZM2G130440	562	1915	0.9582	70.0309
GRMZM2G000264	562	2152	0.7147	62.3184
GRMZM2G140590	562	2509	0.9043	53.4513
GRMZM2G140328	562	3559	0.8966	37.6817
GRMZM2G704053	561	1569	0.9452	85.3222
GRMZM2G366532	561	2542	0.9099	52.6635
GRMZM2G099666	561	2419	0.4328	55.3413
GRMZM2G092296	560	2098	0.5091	63.6949
GRMZM2G316967	560	3804	0.9458	35.1293
GRMZM2G130432	560	1663	0.9333	80.3559
GRMZM2G047681	560	1591	0.934	83.9924
AC187157.4	560	2577	0.9849	51.8556
AC193379.3	559	2940	0.9265	45.3719
GRMZM2G092959	559	2183	0.885	61.1055
GRMZM2G145854	559	2868	0.8511	46.5109
GRMZM2G472693	559	3655	0.939	36.4961
GRMZM2G439950	559	3536	0.9449	37.7244
GRMZM2G171430	559	2039	0.4316	65.4209
GRMZM2G386824	558	3020	0.8722	44.091
GRMZM2G097116	558	1699	0.2213	78.3724
GRMZM2G133621	558	2403	0.9114	55.4119
GRMZM2G359038	558	2356	0.9109	56.5173
GRMZM2G078360	556	5060	0.7263	26.2208
GRMZM2G110185	556	1844	0.8509	71.9509
GRMZM2G074361	556	914	0.965	145.161
GRMZM2G063679	555	2029	0.9019	65.2729
GRMZM2G044469	555	1566	0.8825	84.5714
GRMZM2G142072	555	3375	0.9381	39.2411
AC196426.3	554	2235	0.979	59.15
GRMZM2G329885	554	3211	0.811	41.171
GRMZM2G130678	553	1054	0.9421	125.201
GRMZM5G870752	553	1178	0.9185	112.022
GRMZM2G029370	553	2140	0.928	61.6643
AC233870.1	553	1944	0.9846	67.8814
GRMZM2G165426	553	2777	0.798	47.5195
GRMZM2G004932	552	2287	0.9799	57.5964
GRMZM2G412899	551	2176	0.9729	60.4248
GRMZM2G054905	551	3778	0.8007	34.8026
GRMZM2G057935	550	4151	0.8689	31.6178
GRMZM2G134613	550	1846	0.7595	71.0973
GRMZM2G089484	550	2581	0.9458	50.8507
GRMZM2G082484	550	1796	0.8029	73.0766
GRMZM2G090226	550	1522	0.772	86.2324
GRMZM2G130586	550	3155	0.8735	41.5993
GRMZM5G815009	550	1074	0.8771	122.203
GRMZM2G165679	549	1262	0.958	103.809
GRMZM5G882708	549	2295	0.8392	57.0837
GRMZM2G110153	548	1210	0.8983	108.073
GRMZM2G117851	548	1614	0.9678	81.0213
GRMZM2G107815	548	2175	0.9729	60.1234
GRMZM2G368448	548	4559	0.8166	28.6836
GRMZM2G152877	547	2942	0.9748	44.3677
GRMZM2G463464	547	2808	0.8433	46.485
GRMZM2G013114	547	3335	0.9259	39.1394
GRMZM5G831993	546	1838	0.9592	70.8875
GRMZM2G174481	546	1523	0.8109	85.549
GRMZM2G097249	546	3600	0.9617	36.192
GRMZM2G106906	546	1157	0.8254	112.611
GRMZM2G149153	545	7521	0.849	17.2919
GRMZM2G034764	545	1893	0.831	68.7018
GRMZM2G051764	544	1886	0.9565	68.8303
GRMZM2G017616	544	3392	0.8001	38.2706
GRMZM2G168706	544	2351	0.8762	55.2165
GRMZM2G109509	543	4235	0.877	30.5963
GRMZM2G104373	543	1764	0.9059	73.4554
GRMZM2G016447	542	1708	0.8747	75.724
GRMZM2G115372	542	3082	0.6583	41.9652
GRMZM2G022313	542	2347	0.9608	55.1072
GRMZM5G825524	542	2906	0.9129	44.5068
GRMZM2G332562	541	2339	0.7905	55.1937
GRMZM2G081188	541	2491	0.953	51.8258
GRMZM2G174202	541	1846	0.9274	69.9339
GRMZM2G119361	541	2728	0.9644	47.3233
GRMZM2G057441	540	3681	0.8699	35.0066
GRMZM2G014788	540	3986	0.9443	32.328
GRMZM2G141258	538	6058	0.8944	21.1922
GRMZM2G401050	538	3148	0.8409	40.7821
GRMZM5G855347	538	3395	0.6112	37.8151
AC149829.2	537	3075	0.6241	41.6727
GRMZM2G036921	537	1286	0.9697	99.645
GRMZM2G027049	537	3722	0.8211	34.4287
GRMZM2G181000	537	1909	0.781	67.126
GRMZM2G011592	537	2036	0.7775	62.9388
GRMZM2G140867	536	1385	0.857	92.3501
GRMZM2G170120	536	3978	0.4771	32.1531
GRMZM2G435373	535	1839	0.9375	69.4215
GRMZM2G097533	535	2391	0.7762	53.3945
GRMZM2G007587	534	2124	0.8879	59.9942
GRMZM2G113480	534	682	0.9839	186.844
GRMZM2G022180	534	2427	0.6881	52.5042
GRMZM2G160626	534	1583	0.47	80.4975
GRMZM2G394450	533	2450	0.9265	51.9139
GRMZM2G023037	533	3825	0.6735	33.252
GRMZM5G802392	532	920	0.875	137.99
GRMZM2G151050	532	2440	0.9029	52.0288
GRMZM2G448511	532	823	0.7886	154.253
GRMZM2G035807	532	2456	0.8428	51.6899
GRMZM2G178415	532	2657	0.4893	47.7796
GRMZM5G806358	531	5464	0.6744	23.1903
GRMZM5G839757	531	1986	0.9758	63.8025
GRMZM2G176396	531	1721	0.8024	73.6268
GRMZM2G022538	531	1568	0.7341	80.811
GRMZM2G081175	530	2212	0.8562	57.1759
GRMZM2G004699	530	1798	0.6774	70.341
GRMZM2G133396	530	2315	0.8579	54.632
GRMZM2G165044	530	2072	0.9474	61.0391
GRMZM2G001652	529	3697	0.8802	34.1451
GRMZM2G341747	529	3552	0.9749	35.539
GRMZM2G314898	529	1715	0.9271	73.6061
GRMZM2G163749	529	2881	0.9084	43.8162
GRMZM2G099630	528	3835	0.9074	32.8542
GRMZM2G127756	528	2503	0.9545	50.3379
GRMZM2G097434	528	3372	0.8304	37.3653
GRMZM2G054152	528	2292	0.9407	54.972
GRMZM2G132000	527	1026	0.7534	122.57
GRMZM2G023020	527	2350	0.6698	53.5137
GRMZM2G574782	527	1985	0.8972	63.3538
GRMZM2G132060	527	2327	0.8526	54.0426
GRMZM2G464782	526	1828	0.9201	68.6644
GRMZM5G836182	526	1072	0.9021	117.088
GRMZM2G323024	526	4583	0.8898	27.3879
GRMZM2G171354	526	2496	0.8922	50.2879
GRMZM2G123977	525	2202	0.837	56.8937
GRMZM2G426591	525	2063	0.9355	60.7271
GRMZM2G019121	525	2159	0.868	58.0268
GRMZM2G060357	525	1379	0.8978	90.8484
GRMZM2G175273	525	646	0.9427	193.932
GRMZM2G314652	525	2151	0.9888	58.2427
GRMZM2G340048	525	2335	0.9242	53.6531
GRMZM2G155911	525	2057	0.8999	60.9042
GRMZM2G108285	525	1005	0.9502	124.657
GRMZM2G152703	524	1352	0.7315	92.4862
GRMZM2G165778	524	1940	0.9232	64.4543
GRMZM2G016749	524	2648	0.8327	47.221
GRMZM2G058522	524	1552	0.6128	80.5679
GRMZM2G139977	524	6022	0.9029	20.7641
GRMZM2G105466	524	2314	0.7126	54.0369
GRMZM2G336908	523	2084	0.8637	59.8861
AC199765.4	523	1491	0.8142	83.704
GRMZM2G169820	523	3885	0.8968	32.1242
AC211737.3	523	2115	0.913	59.0084
GRMZM2G010941	523	2219	0.863	56.2428
GRMZM2G047774	523	2313	0.952	53.9571
GRMZM2G078876	522	1213	0.8763	102.691
GRMZM2G122135	522	2270	0.907	54.874
GRMZM2G155954	522	2178	0.9178	57.1919
GRMZM2G132373	521	5444	0.9414	22.8371
GRMZM2G394410	521	2386	0.5624	52.1062
GRMZM2G165987	521	1697	0.749	73.2619
GRMZM2G100620	520	1504	0.7161	82.5045
GRMZM2G021194	520	2978	0.8351	41.6678
GRMZM2G157317	520	1977	0.9332	62.7652
GRMZM2G406603	520	2317	0.8442	53.5549
GRMZM2G033526	520	2643	0.7813	46.9492
GRMZM2G115456	520	2458	0.7783	50.4828
GRMZM2G004927	519	1212	0.9967	102.185
GRMZM2G306105	519	1088	0.8548	113.831
GRMZM2G104025	519	1394	0.7059	88.8437
GRMZM2G098076	518	2352	0.9639	52.5551
GRMZM2G003331	518	2337	0.8939	52.8924
GRMZM2G344911	518	1194	0.8333	103.526
GRMZM2G077897	518	2805	0.9226	44.0676
GRMZM2G151193	518	1785	0.8639	69.249
GRMZM2G005947	518	2167	0.6802	57.0418
GRMZM2G146951	517	2476	0.9628	49.8267
GRMZM2G140051	517	1713	0.8716	72.0204
GRMZM2G119755	517	836	0.945	147.573
GRMZM2G093119	516	4243	0.9284	29.0201
GRMZM2G393471	516	7061	0.87	17.4384
GRMZM2G142863	516	3966	0.8306	31.047
GRMZM2G011483	515	3743	0.9033	32.8329
GRMZM2G447617	515	1657	0.7924	74.1664
GRMZM2G118241	514	2611	0.8342	46.9763
GRMZM2G080775	514	2794	0.9792	43.8994
GRMZM2G147800	514	2709	0.9815	45.2769
GRMZM2G137236	514	3916	0.8453	31.3215
GRMZM2G001645	513	2554	0.8708	47.9312
GRMZM2G173967	513	1883	0.881	65.0114
GRMZM5G882852	513	1473	0.408	83.1069
GRMZM2G009655	513	3548	0.9335	34.5029
GRMZM2G047855	513	1711	0.9006	71.5467
GRMZM2G017086	512	1968	0.8018	62.0822
GRMZM2G074914	512	1893	0.8347	64.5419
GRMZM2G446050	512	5975	0.7078	20.4482
GRMZM2G020940	512	1548	0.8488	78.9262
GRMZM2G175661	512	4579	0.8048	26.6822
GRMZM5G807639	512	1805	0.9363	67.6885
AC206788.3	512	3506	0.405	34.8482
GRMZM2G125728	511	2633	0.8842	46.3119
GRMZM2G006964	511	1566	0.8659	77.8666
GRMZM2G013890	511	3239	0.8509	37.6472
GRMZM2G335052	511	3266	0.8885	37.3359
GRMZM2G429118	510	2115	0.8714	57.5416
GRMZM2G443525	510	3824	0.7207	31.8254
GRMZM2G176029	510	1494	0.8119	81.4595
GRMZM2G139431	509	683	0.7921	177.836
GRMZM2G104626	509	2830	0.6739	42.9194
GRMZM2G035461	509	3167	0.9675	38.3523
GRMZM2G351074	509	2614	0.935	46.4659
GRMZM2G300348	509	2093	0.8844	58.0324
GRMZM2G173747	508	948	0.8671	127.873
GRMZM2G003692	508	1946	0.7903	62.2936
GRMZM2G056645	507	8354	0.8181	14.4822
GRMZM2G309025	507	2874	0.9576	42.0963
GRMZM2G035405	507	2932	0.9175	41.2635
GRMZM2G040477	507	1473	0.9572	82.1348
GRMZM2G474798	507	8784	0.7633	13.7733
GRMZM2G102560	507	2508	0.8341	48.2395
GRMZM2G308203	507	2934	0.8712	41.2354
GRMZM2G083437	506	3274	0.931	36.8803
GRMZM2G173085	506	2048	0.9521	58.958
GRMZM5G898290	506	1313	0.9886	91.9619
GRMZM2G035243	506	2550	0.8996	47.3514
GRMZM2G174926	505	2781	0.9061	43.3324
GRMZM2G172210	505	1945	0.9424	61.9575
GRMZM2G060611	505	3205	0.9051	37.5998
GRMZM2G017805	504	2460	0.8472	48.8897
GRMZM2G145101	504	2510	0.647	47.9158
GRMZM2G145175	504	1538	0.8212	78.1981
GRMZM2G050984	503	2354	0.9609	50.9899
GRMZM2G148800	503	1884	0.9172	63.7103
GRMZM2G441541	503	3504	0.8659	34.2552
GRMZM2G031360	503	4806	0.4938	24.9751
GRMZM2G058039	503	2324	0.8877	51.6481
GRMZM2G431573	502	3404	0.9424	35.1914
GRMZM2G305027	502	1101	0.852	108.802
GRMZM2G044460	502	1307	0.9128	91.6538
GRMZM2G062156	502	2179	0.9238	54.9754
GRMZM2G056870	501	1810	0.6221	66.0513
GRMZM2G157332	501	2068	0.7394	57.8109
GRMZM2G001272	500	2172	0.8674	54.9329
GRMZM2G424205	500	2028	0.4961	58.8334
GRMZM2G480002	500	5453	0.8911	21.8805
GRMZM2G017941	500	1469	0.8502	81.2214
GRMZM2G333875	499	2253	0.8455	52.852
GRMZM2G001639	499	1843	0.8687	64.6097
GRMZM2G032807	499	1009	0.9514	118.013
GRMZM2G334457	499	3958	0.9111	30.0848
GRMZM2G320013	499	3442	0.8995	34.5949
GRMZM2G126821	498	2042	0.8208	58.1964
GRMZM2G109284	498	3260	0.8822	36.4531
GRMZM2G019050	498	3290	0.9167	36.1207
GRMZM2G032409	498	2211	0.972	53.7481
GRMZM2G117582	498	1848	0.4426	64.3057
GRMZM2G074401	498	1459	0.8986	81.451
GRMZM2G176647	498	3659	0.9172	32.478
GRMZM5G889372	497	3533	0.9072	33.5687
GRMZM2G153368	497	754	0.6592	157.292
GRMZM2G020096	497	2115	0.8109	56.0749
GRMZM2G035017	497	1469	0.5813	80.7341
GRMZM2G167149	496	1052	0.9325	112.509
GRMZM2G137676	496	2307	0.9632	51.3046
GRMZM2G157334	496	1182	0.8367	100.135
GRMZM2G127050	495	2471	0.8555	47.8029
GRMZM2G317900	495	3231	0.9477	36.5587
GRMZM2G131099	495	788	0.9391	149.9
GRMZM2G303374	494	1992	0.3017	59.1779
GRMZM2G047431	494	1782	0.8984	66.1518
GRMZM2G077406	494	2773	0.8987	42.5108
GRMZM2G147245	494	2130	0.7418	55.3439
GRMZM2G121820	494	1674	0.6374	70.4196
GRMZM2G347541	493	2803	0.6828	41.9707
GRMZM2G151916	493	1926	0.9242	61.0819
GRMZM2G145280	493	1036	0.8359	113.556
GRMZM2G092327	492	2650	0.8464	44.3038
GRMZM2G036034	492	3563	0.7735	32.9512
GRMZM2G032852	492	3282	0.7523	35.7725
GRMZM2G159926	492	1756	0.8781	66.8595
GRMZM2G330635	492	1406	0.6366	83.503
GRMZM2G030463	491	2858	0.8957	40.996
GRMZM2G369939	491	2194	0.9471	53.4032
GRMZM2G476009	491	1088	0.8548	107.69
GRMZM2G068755	490	6523	0.8265	17.9255
GRMZM2G068217	490	4719	0.9447	24.7781
GRMZM2G024865	490	1835	0.8785	63.721
GRMZM2G177621	490	2524	0.9382	46.3264
GRMZM2G103230	489	3767	0.9392	30.9767
GRMZM2G130425	489	2467	0.8585	47.3001
GRMZM2G017187	489	2579	0.9616	45.246
GRMZM2G322024	489	5538	0.8891	21.0707
GRMZM2G018177	489	1560	0.8359	74.8008
GRMZM2G043822	488	2103	0.8445	55.3736
GRMZM2G033478	488	6597	0.9107	17.6521
GRMZM2G122750	487	5799	0.8929	20.04
GRMZM2G151254	487	2010	0.8552	57.8169
GRMZM2G076593	486	2084	0.9064	55.6494
GRMZM2G463032	486	4419	0.5415	26.2443
GRMZM2G077036	485	2455	0.9177	47.1425
GRMZM2G153075	485	1972	0.7049	58.689
GRMZM2G438722	485	3272	0.8078	35.3713
GRMZM2G083894	485	1606	0.6326	72.064
GRMZM2G156638	484	2344	0.9876	49.2731
GRMZM2G019926	484	2919	0.776	39.567
GRMZM2G012319	484	4260	0.8289	27.1118
GRMZM2G096548	484	2103	0.9001	54.9197
GRMZM2G340224	484	2410	0.6788	47.9237
GRMZM2G133407	483	1503	0.7618	76.685
GRMZM2G387076	483	1646	0.3931	70.0228
GRMZM2G409865	483	2098	0.9881	54.9369
GRMZM2G078468	483	5237	0.6271	22.0083
GRMZM2G135795	482	992	0.9708	115.946
GRMZM2G046284	482	1809	0.9619	63.5815
AC233893.1	482	2349	0.0792	48.9651
GRMZM2G113950	481	2702	0.9308	42.4798
GRMZM2G038183	481	2656	0.9089	43.2155
GRMZM2G404897	481	2333	0.8345	49.1986
GRMZM2G097662	481	2213	0.8911	51.8664
GRMZM2G459702	481	2823	0.9667	40.659
GRMZM2G052403	480	2637	0.8684	43.4364
GRMZM2G054300	480	2013	0.5618	56.901
GRMZM2G125387	480	3185	0.7284	35.9628
GRMZM2G157384	480	1514	0.8164	75.655
GRMZM2G097122	479	858	0.9394	133.22
GRMZM2G003883	479	1994	0.9609	57.3235
GRMZM2G153792	479	4527	0.9187	25.2492
GRMZM2G155686	479	1633	0.9161	69.9957
GRMZM2G104958	478	3675	0.9565	31.0379
GRMZM2G027282	478	1776	0.6475	64.2255
GRMZM2G138770	478	2070	0.8705	55.1036
GRMZM2G013639	477	1653	0.9552	68.8601
GRMZM2G147671	477	1715	0.891	66.3707
GRMZM2G136372	477	923	0.2882	123.322
GRMZM2G424053	477	1208	0.6175	94.2266
GRMZM2G010298	477	1464	0.847	77.7498
GRMZM2G085568	476	2415	0.6882	47.034
GRMZM2G308106	476	1556	0.9325	72.9995
GRMZM2G166873	476	2900	0.9438	39.168
GRMZM2G144971	476	5683	0.8661	19.9872
GRMZM2G132468	476	2580	0.9341	44.026
GRMZM2G098569	475	1568	0.9311	72.2886
GRMZM2G000052	475	2411	0.8909	47.0131
GRMZM2G126922	475	1343	0.8347	84.3995
GRMZM2G316191	475	7924	0.7923	14.3045
GRMZM2G138976	475	1422	0.9634	79.7106
GRMZM2G140432	475	3097	0.9387	36.5995
GRMZM2G374065	475	2874	0.9638	39.4393
GRMZM2G001084	475	3072	0.7298	36.8973
GRMZM2G060824	475	4033	0.7858	28.1053
GRMZM2G066441	475	1838	0.944	61.6695
GRMZM2G155329	474	1266	0.797	89.3443
GRMZM2G175076	474	1315	0.7734	86.0151
GRMZM2G065494	474	3407	0.6589	33.1993
GRMZM2G541193	474	2664	0.9493	42.4587
GRMZM2G092256	474	1847	0.7791	61.2398
GRMZM2G422651	474	2301	0.9144	49.1568
GRMZM2G071844	474	1660	0.7741	68.1385
GRMZM2G401869	474	6555	0.8352	17.2555
GRMZM2G070863	473	2500	0.7832	45.1485
GRMZM2G120115	473	1790	0.8101	63.0566
GRMZM2G130002	473	3238	0.9679	34.8583
GRMZM5G882986	473	1998	0.9359	56.4921
GRMZM2G331032	473	2011	0.9324	56.1269
GRMZM2G086887	473	2688	0.8274	41.9908
GRMZM2G093359	473	1828	0.8321	61.7458
GRMZM2G155348	472	2422	0.8382	46.504
GRMZM2G442148	472	2310	0.855	48.7587
GRMZM2G469162	472	4107	0.8951	27.4246
GRMZM2G009591	472	2506	0.8532	44.9452
GRMZM2G151087	472	1511	0.9305	74.5418
GRMZM2G103430	471	2032	0.9478	55.312
AC235541.1	471	3009	0.897	37.3526
GRMZM5G862817	471	1788	0.6717	62.8602
GRMZM2G060564	471	1650	0.7927	68.1176
GRMZM2G432796	471	3458	0.8158	32.5026
GRMZM2G129288	470	2229	0.9067	50.3165
GRMZM2G161728	470	1755	0.8131	63.9062
GRMZM2G131708	470	1872	0.8739	59.9121
GRMZM2G149843	470	1436	0.915	78.1026
GRMZM2G006707	470	3054	0.9889	36.7241
GRMZM2G366150	470	2473	0.9244	45.352
GRMZM2G146589	470	2585	0.8522	43.387
GRMZM2G322953	470	1717	0.9814	65.3205
GRMZM2G350626	470	6624	0.5919	16.9317
GRMZM2G099056	470	3073	0.8923	36.497
GRMZM2G481005	470	4474	0.7526	25.0683
GRMZM5G876616	469	1020	0.6951	109.722
GRMZM2G024668	469	2550	0.9392	43.8889
GRMZM2G169095	469	2569	0.8747	43.5643
GRMZM2G111611	469	1282	0.6981	87.2986
GRMZM2G018508	469	3684	0.9218	30.3791
GRMZM2G042171	469	2650	0.9091	42.2327
GRMZM2G000044	469	1102	0.6742	101.558
GRMZM2G158629	468	2116	0.8979	52.7779
GRMZM2G058745	467	2136	0.8694	52.172
GRMZM2G092311	467	1216	0.8528	91.6443
GRMZM2G083551	467	1638	0.7589	68.0339
GRMZM2G011219	467	2940	0.8269	37.9046
GRMZM2G445634	466	873	0.8545	127.378
GRMZM2G081582	466	2681	0.8605	41.4774
GRMZM2G177781	466	2587	0.9567	42.9845
GRMZM2G099337	465	5106	0.9352	21.7317
GRMZM5G825515	465	3217	0.8539	34.4925
GRMZM2G014653	465	2034	0.7389	54.5537
GRMZM2G120578	465	1822	0.9693	60.9013
GRMZM2G066578	464	2489	0.8911	44.4852
GRMZM2G152258	464	1512	0.8082	73.2299
GRMZM5G813111	464	1625	0.9132	68.1376
GRMZM2G550865	464	2089	0.8904	53.0032
GRMZM2G079308	464	2827	0.7198	39.1665
GRMZM2G136400	464	1862	0.8931	59.4649
GRMZM2G468756	464	2671	0.8278	41.454
AC205122.4	463	2481	0.0198	44.5324
GRMZM2G163193	463	3149	0.9543	35.0857
GRMZM2G164821	463	2347	0.9672	47.075
GRMZM2G125044	463	3315	0.8184	33.3288
GRMZM2G704032	463	2391	0.9322	46.2087
GRMZM2G029186	463	4584	0.9058	24.1023
GRMZM2G452016	463	2310	0.9329	47.829
GRMZM2G118800	462	2036	0.8787	54.1485
GRMZM2G048482	462	2907	0.8923	37.9244
GRMZM2G057450	462	2114	0.9087	52.1506
AC216067.3	462	498	0.8936	221.378
GRMZM2G553314	461	2542	0.9461	43.2761
AC185226.4	461	2790	0.9258	39.4293
GRMZM2G174572	461	2952	0.8977	37.2655
GRMZM2G018775	460	4047	0.6192	27.1236
GRMZM2G073504	460	3018	0.6233	36.3715
GRMZM2G161913	460	4021	0.9174	27.299
GRMZM2G442008	460	1595	0.8389	68.8207
GRMZM2G080048	460	1461	0.8549	75.1328
GRMZM2G126749	460	2062	0.9442	53.2343
GRMZM2G035996	460	2646	0.4856	41.4849
GRMZM2G156643	460	2563	0.7015	42.8284
GRMZM2G029559	459	1726	0.9177	63.4591
GRMZM2G160174	459	1337	0.8332	81.9226
GRMZM2G090245	458	917	0.9084	119.184
AC208023.3	458	528	0.9337	206.992
GRMZM2G080851	458	3350	0.9549	32.6244
GRMZM2G050305	458	1536	0.9577	71.1535
GRMZM2G071630	457	1696	0.793	64.3002
GRMZM2G167637	457	1952	0.981	55.8674
AC234158.1	457	4926	0.8526	22.1383
GRMZM2G432566	456	3283	0.8754	33.1449
GRMZM2G146697	456	3560	0.8944	30.5659
GRMZM2G063069	456	1782	0.9018	61.0632
GRMZM2G180578	456	2059	0.9082	52.8483
GRMZM2G423202	456	2781	0.9328	39.1279
GRMZM2G119411	455	3306	0.931	32.8421
GRMZM2G154229	455	3420	0.8769	31.7474
GRMZM2G071883	454	3014	0.9645	35.9447
GRMZM2G079904	454	3175	0.7965	34.122
GRMZM2G113613	454	2217	0.9382	48.8666
GRMZM2G178227	454	2042	0.6866	53.0545
GRMZM2G406026	454	893	0.7682	121.318
GRMZM2G168449	454	3656	0.8731	29.6327
GRMZM2G161299	454	1581	0.9159	68.5246
GRMZM2G059151	453	2322	0.8665	46.5541
GRMZM2G378906	453	3430	0.8149	31.5157
GRMZM2G008216	453	962	0.9439	112.369
GRMZM2G169671	453	1287	0.8679	83.9928
GRMZM2G049141	452	6055	0.8601	17.8134
GRMZM2G128651	452	1361	0.8508	79.2506
GRMZM2G144403	452	2935	0.8487	36.7496
GRMZM2G035118	452	3705	0.9055	29.112
GRMZM2G360234	452	1633	0.9155	66.0503
GRMZM2G168149	451	1376	0.8794	78.2133
GRMZM2G055204	451	2658	0.7163	40.4896
GRMZM2G052435	451	3891	0.8843	27.6591
GRMZM2G307252	451	1979	0.8732	54.3817
GRMZM2G130389	451	1587	0.8513	67.8144
GRMZM2G017586	451	1321	0.8675	81.4697
GRMZM2G070323	450	3627	0.7899	29.6065
GRMZM2G159996	450	2660	0.559	40.3695
GRMZM5G833406	450	1766	0.8783	60.8057
GRMZM2G052685	450	2646	0.9478	40.5831
GRMZM2G164265	450	2552	0.8245	42.0779
GRMZM2G180471	450	1486	0.8748	72.263
GRMZM2G013457	450	649	0.9661	165.459
GRMZM2G077356	450	1585	0.783	67.7494
GRMZM2G079908	450	866	0.6409	123.999
GRMZM2G154489	450	2306	0.9072	46.5667
GRMZM2G310947	450	2186	0.7896	49.123
GRMZM2G053600	449	2201	0.8237	48.6798
GRMZM2G025731	449	1814	0.9344	59.0651
GRMZM2G067747	449	2417	0.8237	44.3294
GRMZM2G102499	449	2206	0.5195	48.5694
GRMZM2G065073	449	2082	0.9049	51.4621
GRMZM2G122481	449	739	0.8444	144.985
AC226230.2	449	4027	0.9193	26.6065
GRMZM2G100431	449	2151	0.9586	49.8113
GRMZM2G029258	449	3926	0.8826	27.2909
GRMZM2G341729	449	1785	0.4868	60.0247
GRMZM2G000622	449	4869	0.9006	22.0054
GRMZM2G034083	449	1782	0.9119	60.1258
GRMZM2G145024	448	1646	0.825	64.9487
GRMZM2G038126	448	2257	0.8529	47.3662
GRMZM2G030125	448	2256	0.8945	47.3872
GRMZM2G041328	448	4228	0.5979	25.2851
GRMZM2G019325	448	815	0.9227	131.172
GRMZM2G133029	448	2097	0.8813	50.9802
GRMZM2G095141	448	2597	0.7586	41.165
GRMZM2G140156	448	3733	0.9092	28.638
GRMZM2G098237	448	1359	0.6431	78.6649
GRMZM2G048472	447	1975	0.9575	54.0086
GRMZM5G878530	447	2705	0.9253	39.4332
GRMZM2G122277	447	3599	0.7494	29.6379
GRMZM2G000114	447	2905	0.8923	36.7184
GRMZM2G046681	446	2728	0.8999	39.0133
AC212068.4	446	1152	0.8559	92.3857
GRMZM2G160526	446	1700	0.4406	62.6049
GRMZM2G167549	446	2159	0.8337	49.2952
GRMZM2G153274	446	3797	0.6031	28.0296
GRMZM2G143955	446	1845	0.8813	57.6847
GRMZM2G056145	446	3554	0.9049	29.9461
GRMZM2G035268	446	2031	0.9257	52.4019
GRMZM2G424832	446	4055	0.8205	26.2462
GRMZM2G177883	445	3366	0.7846	31.5477
GRMZM2G033931	445	3814	0.897	27.8421
GRMZM2G068151	445	2073	0.8726	51.2251
GRMZM2G050467	445	1461	0.7693	72.6829
GRMZM2G173341	445	2057	0.6237	51.6236
GRMZM2G143328	445	908	0.9471	116.949
GRMZM2G171688	444	2574	0.8749	41.162
GRMZM2G010468	444	2113	0.8036	50.1425
GRMZM2G025074	444	2296	0.9525	46.1459
GRMZM2G028929	444	1571	0.7549	67.4418
GRMZM2G314133	444	5197	0.8884	20.387
GRMZM2G063875	443	2748	0.9465	38.4689
GRMZM2G002959	443	1864	0.8916	56.7127
GRMZM2G078641	443	3933	0.1968	26.8783
GRMZM5G827171	443	2221	0.8028	47.5968
GRMZM2G082916	443	4837	0.8999	21.855
GRMZM2G150024	443	2829	0.8151	37.3674
GRMZM2G169580	443	2666	0.7899	39.6521
GRMZM5G886913	443	1421	0.9395	74.393
GRMZM5G821611	442	2186	0.8788	48.2497
GRMZM2G126507	442	1965	0.9242	53.6762
GRMZM5G892758	442	2686	0.8958	39.268
GRMZM2G431708	442	2982	0.9135	35.3701
GRMZM2G385287	441	1387	0.5833	75.8725
GRMZM2G078985	441	1444	0.7341	72.8775
GRMZM2G007810	441	2612	0.9104	40.2891
GRMZM2G336815	441	1739	0.9149	60.5148
GRMZM2G055489	441	1757	0.963	59.8948
GRMZM2G015238	441	2653	0.922	39.6665
GRMZM5G879882	441	2183	0.9015	48.2067
GRMZM2G311036	440	1545	0.5955	67.9589
GRMZM5G846198	440	1894	0.9065	55.4364
GRMZM2G033356	440	2047	0.9218	51.2929
GRMZM2G136443	440	3379	0.8204	31.0733
GRMZM2G007708	440	746	0.9437	140.746
AC214360.3	440	2772	0.9585	37.8775
GRMZM2G013750	440	1815	0.7218	57.8493
GRMZM2G464401	439	2099	0.8009	49.9085
GRMZM2G127729	439	2848	0.9544	36.783
GRMZM2G056975	439	1917	0.9249	54.6468
GRMZM2G121303	439	1556	0.7841	67.3251
AC218972.3	438	2598	0.9038	40.2307
GRMZM5G833389	438	2040	0.9485	51.2349
AC233910.1	438	2253	0.071	46.3912
GRMZM2G059381	438	2562	0.897	40.796
AC217271.3	438	1834	0.8571	56.9898
GRMZM2G091258	438	3657	0.8499	28.5806
GRMZM2G021110	437	1918	0.9119	54.3695
GRMZM5G823855	437	991	0.9929	105.228
GRMZM2G139517	437	721	0.8363	144.633
GRMZM2G071059	437	1665	0.8198	62.631
GRMZM2G079538	437	2255	0.7831	46.2442
GRMZM2G434696	437	3582	0.9126	29.1124
GRMZM2G069676	437	2327	0.9441	44.8133
GRMZM2G394500	437	1818	0.7145	57.3601
[truncated: 22,297 more rows]
